# Supplementary material
Source: PubMed Central journal article supplement (PMC4333587)

<sup>1</sup>H NMR spectra of compound **1a**

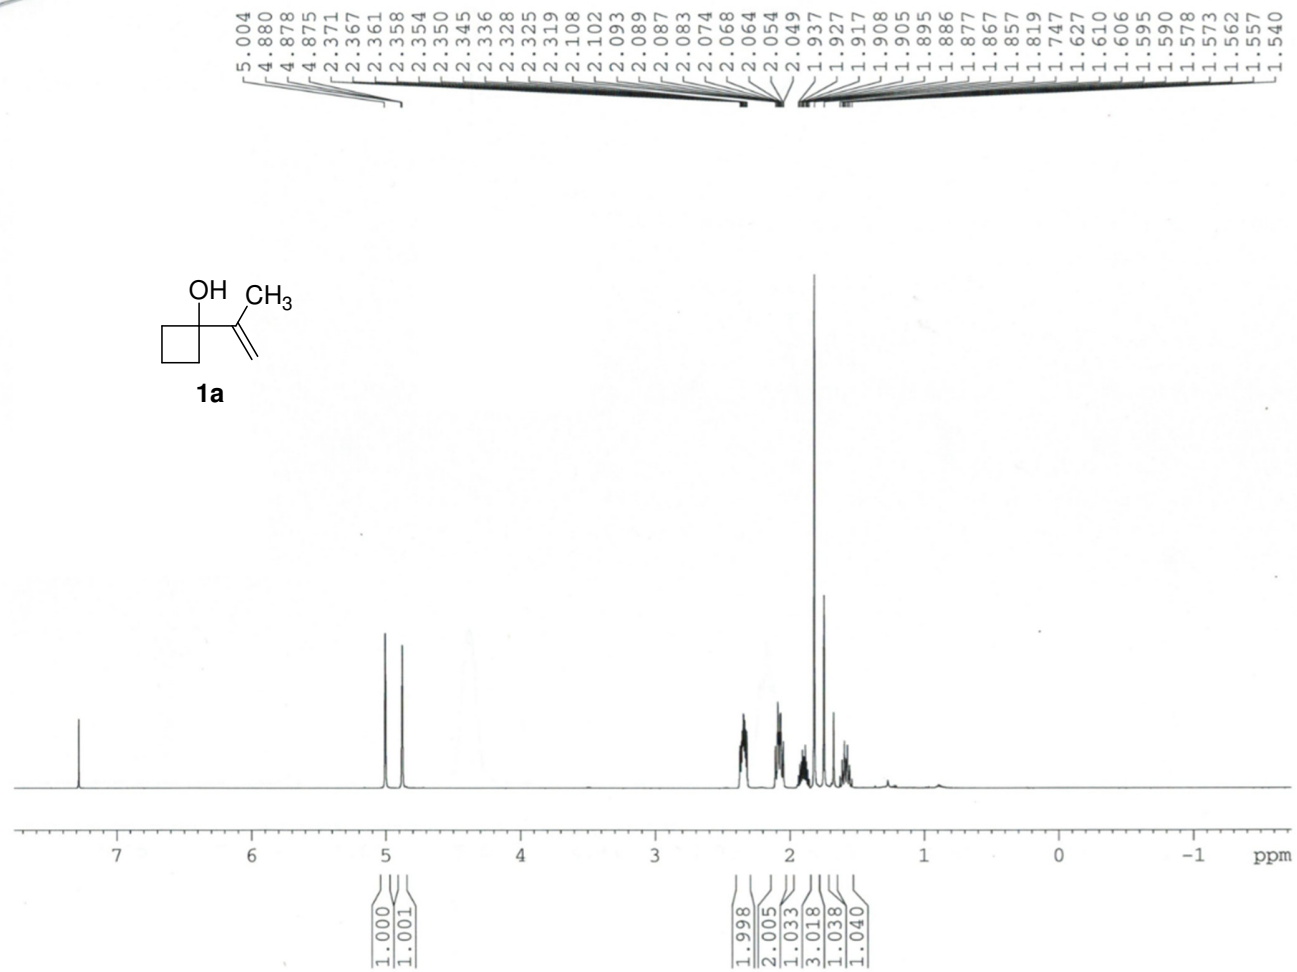

$^{13}\text{C}$  NMR spectra of compound **1a**

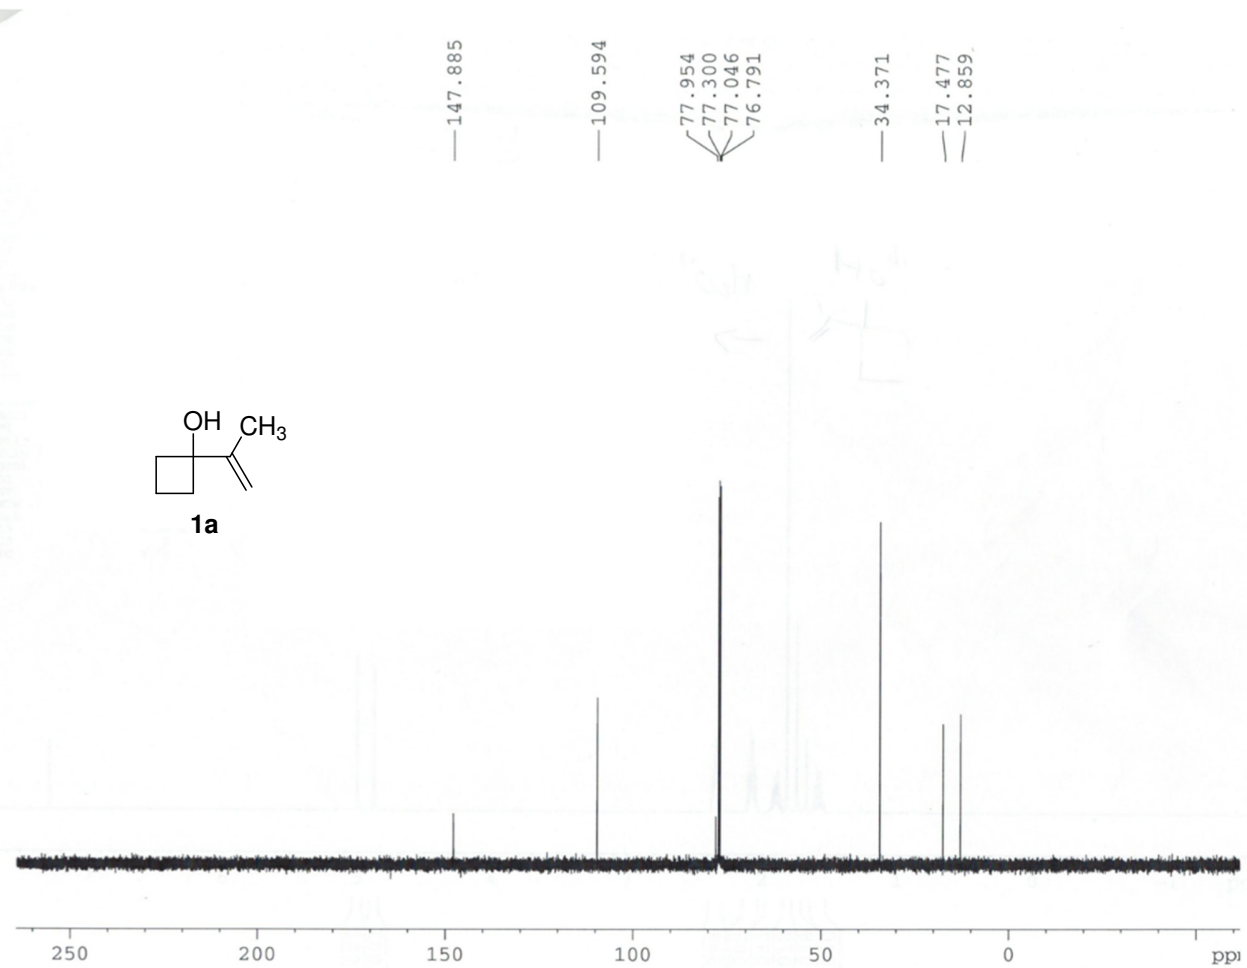

<sup>1</sup>H NMR spectra of compound **1b**

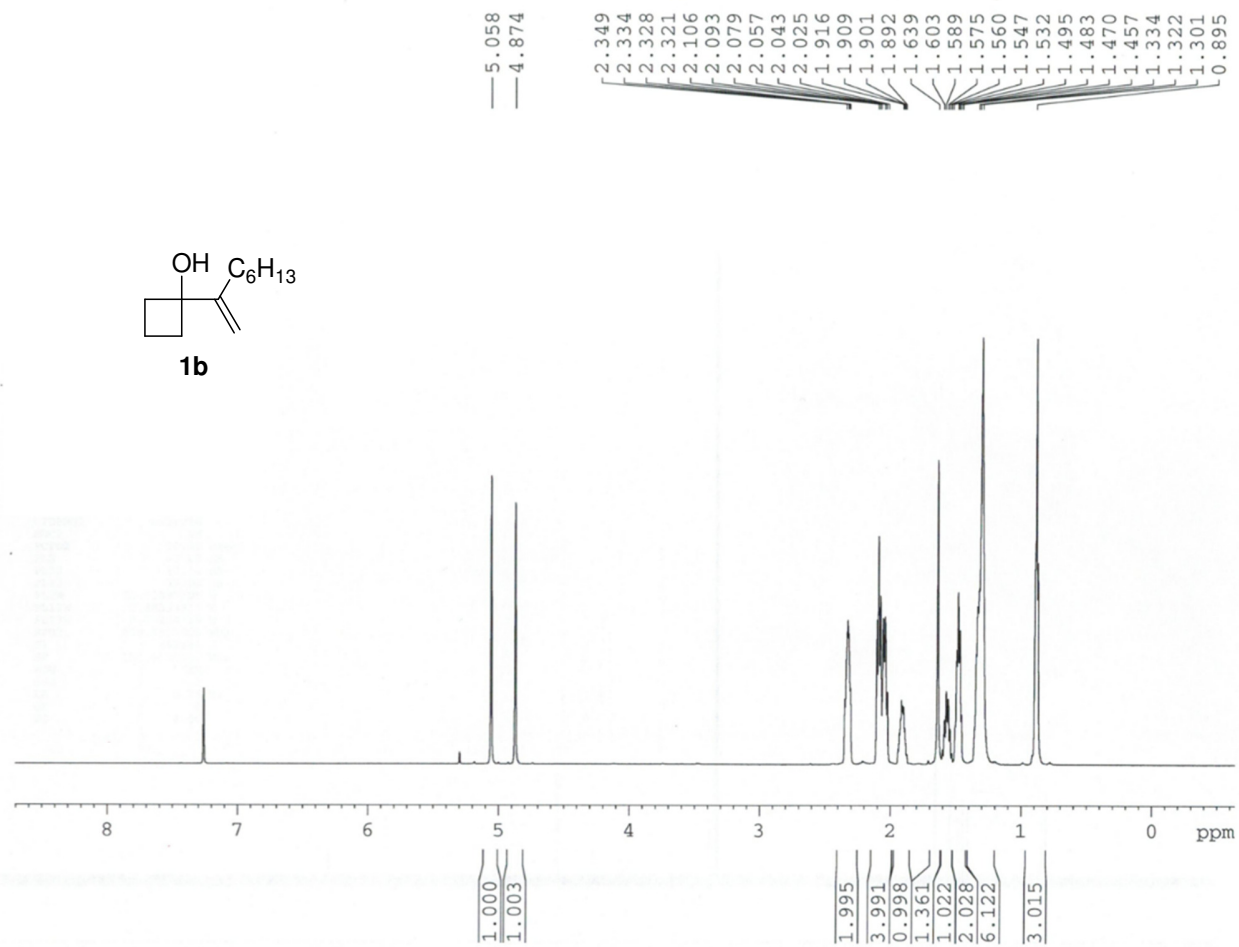

<sup>13</sup>C NMR spectra of compound **1b**

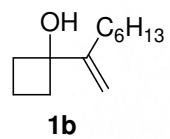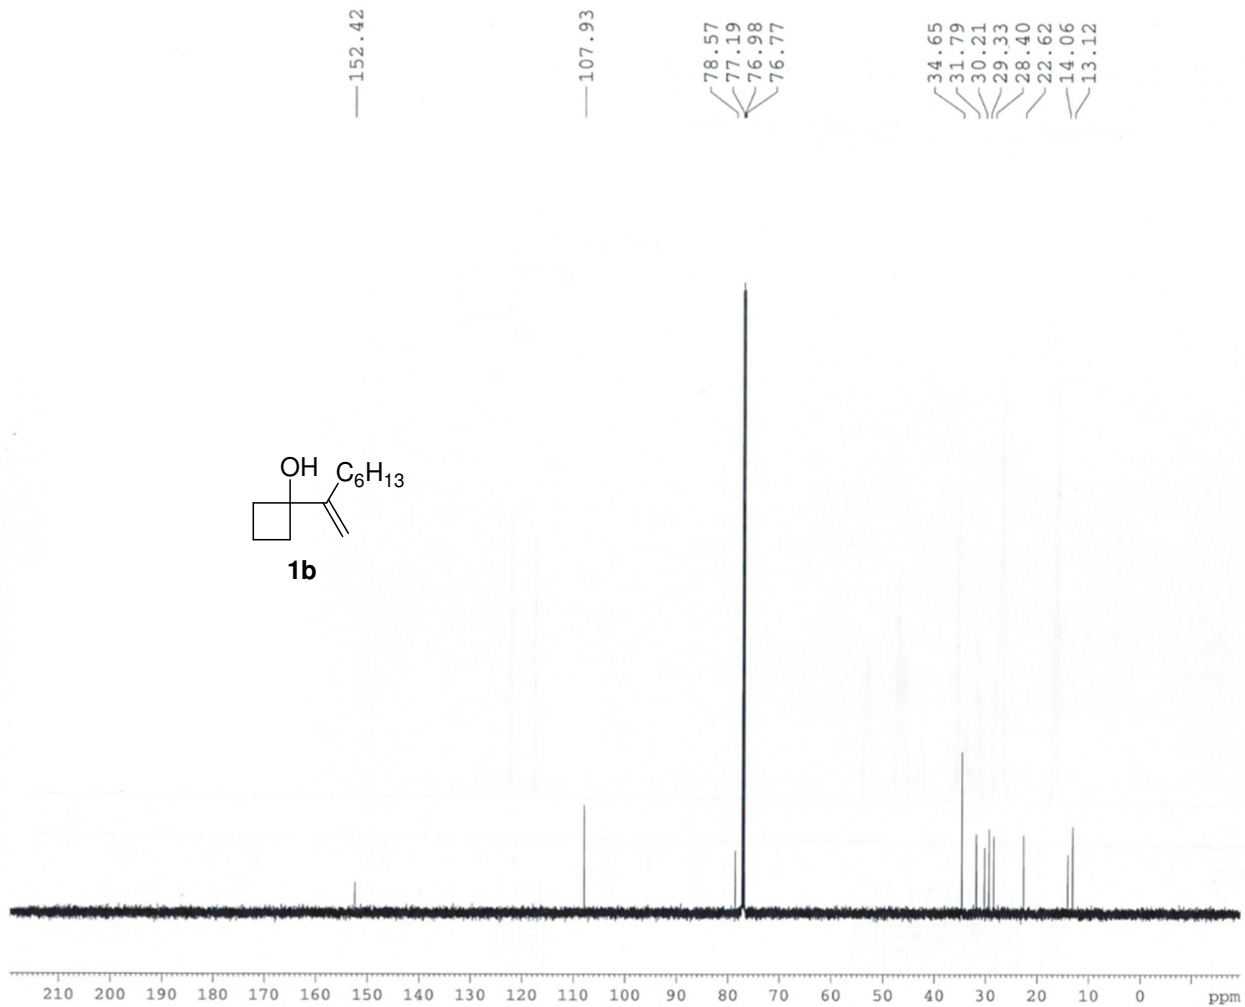



# <sup>1</sup>H NMR spectra of compound **1c**

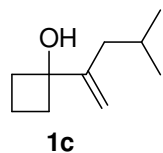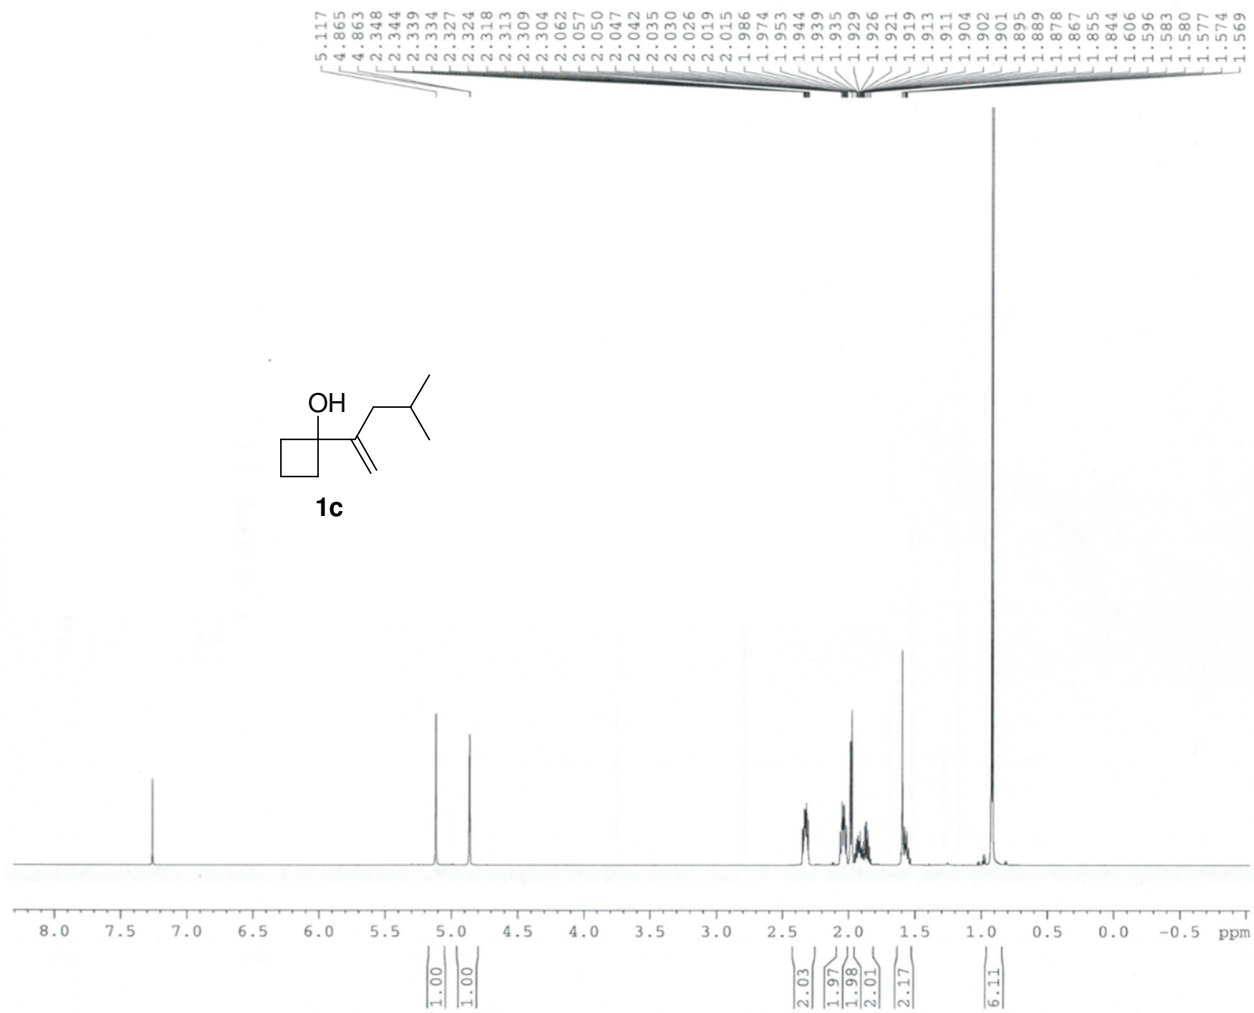

<sup>13</sup>C NMR spectra of compound **1c**

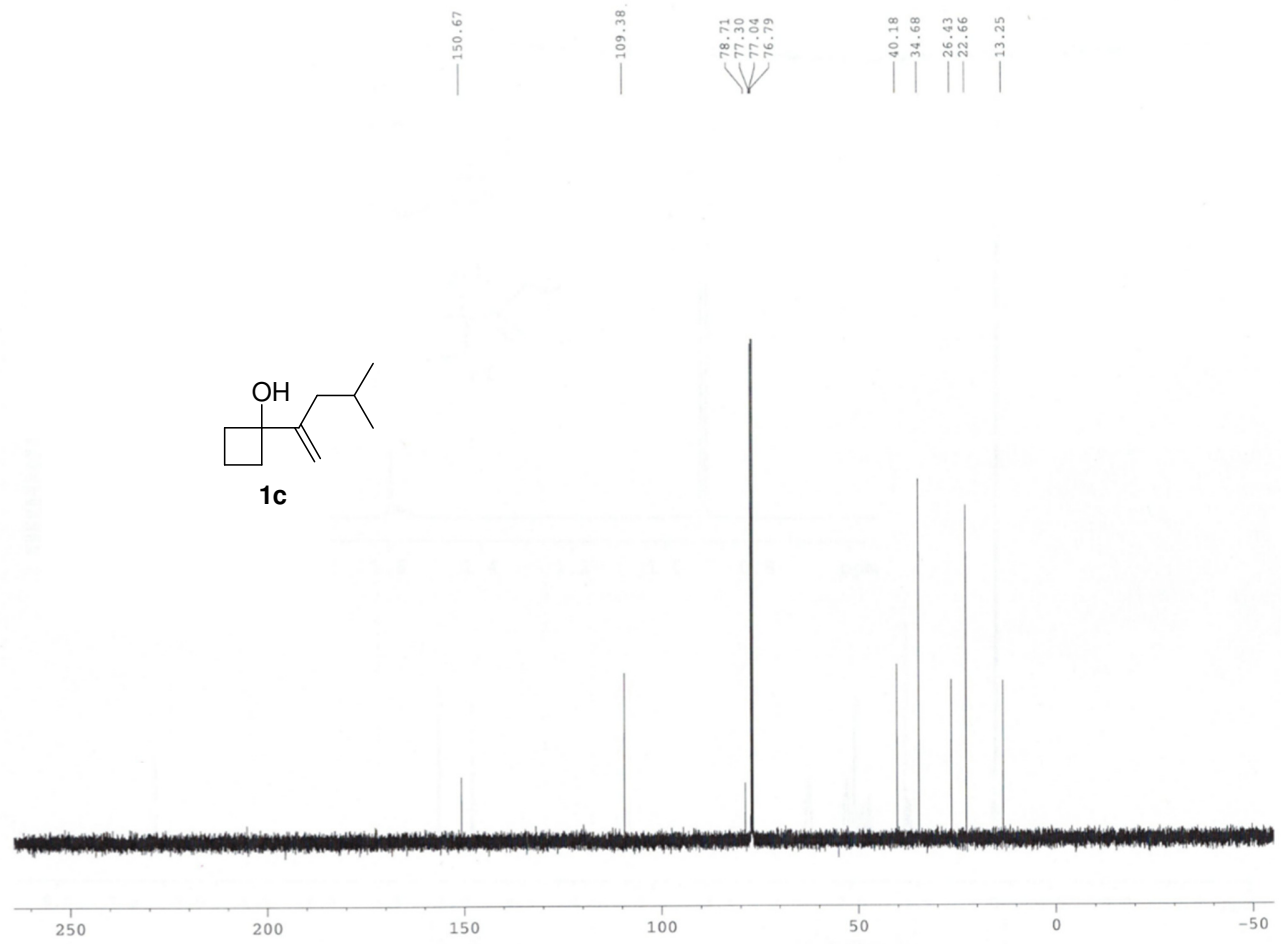

<sup>1</sup>H NMR spectra of compound **1d**

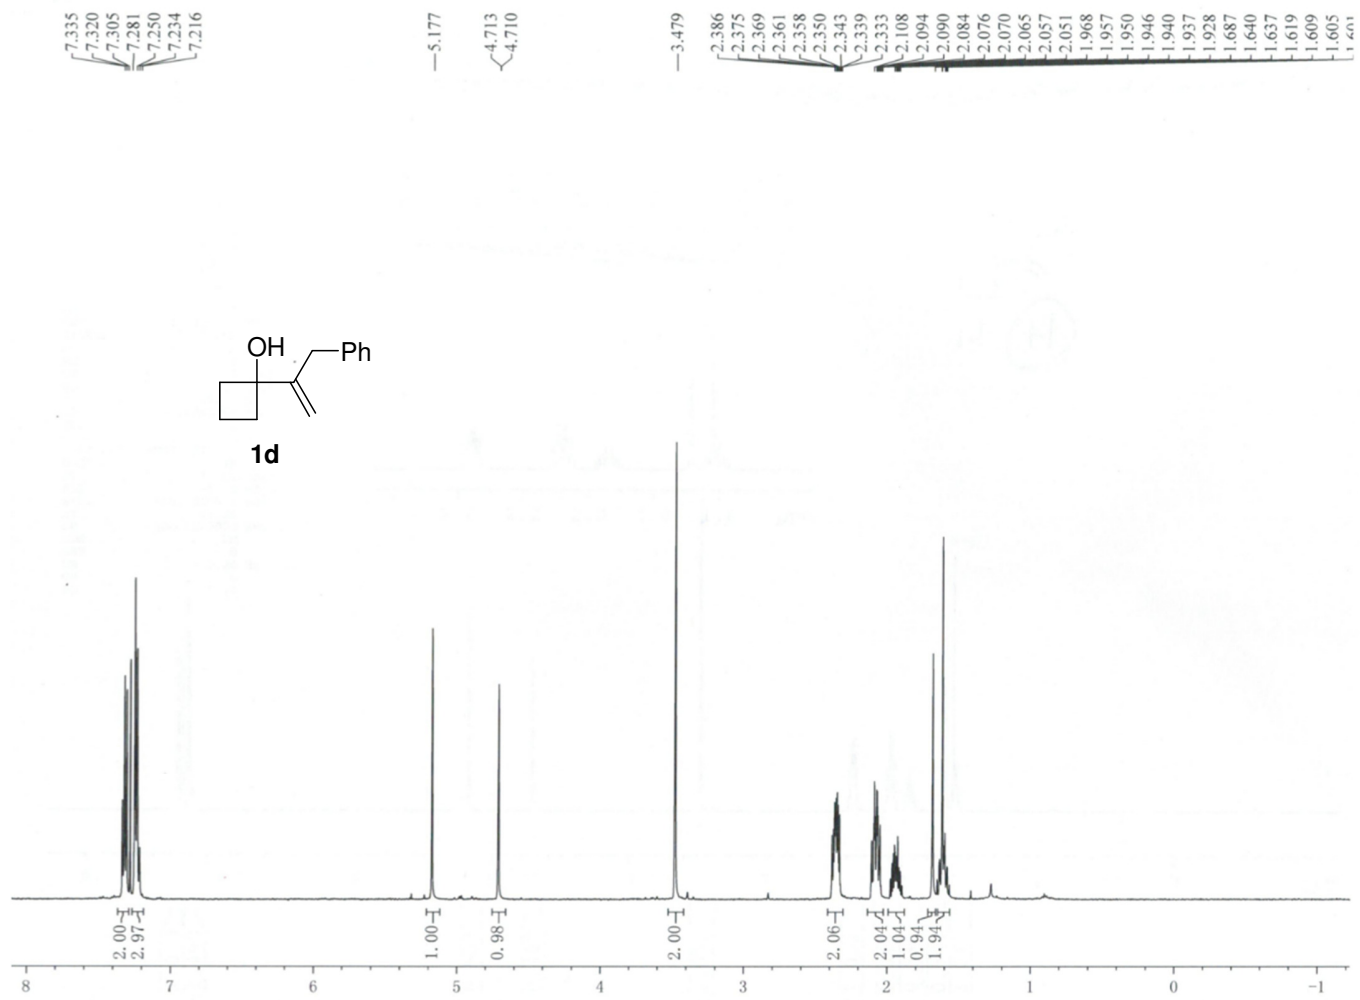

<sup>13</sup>C NMR spectra of compound **1d**

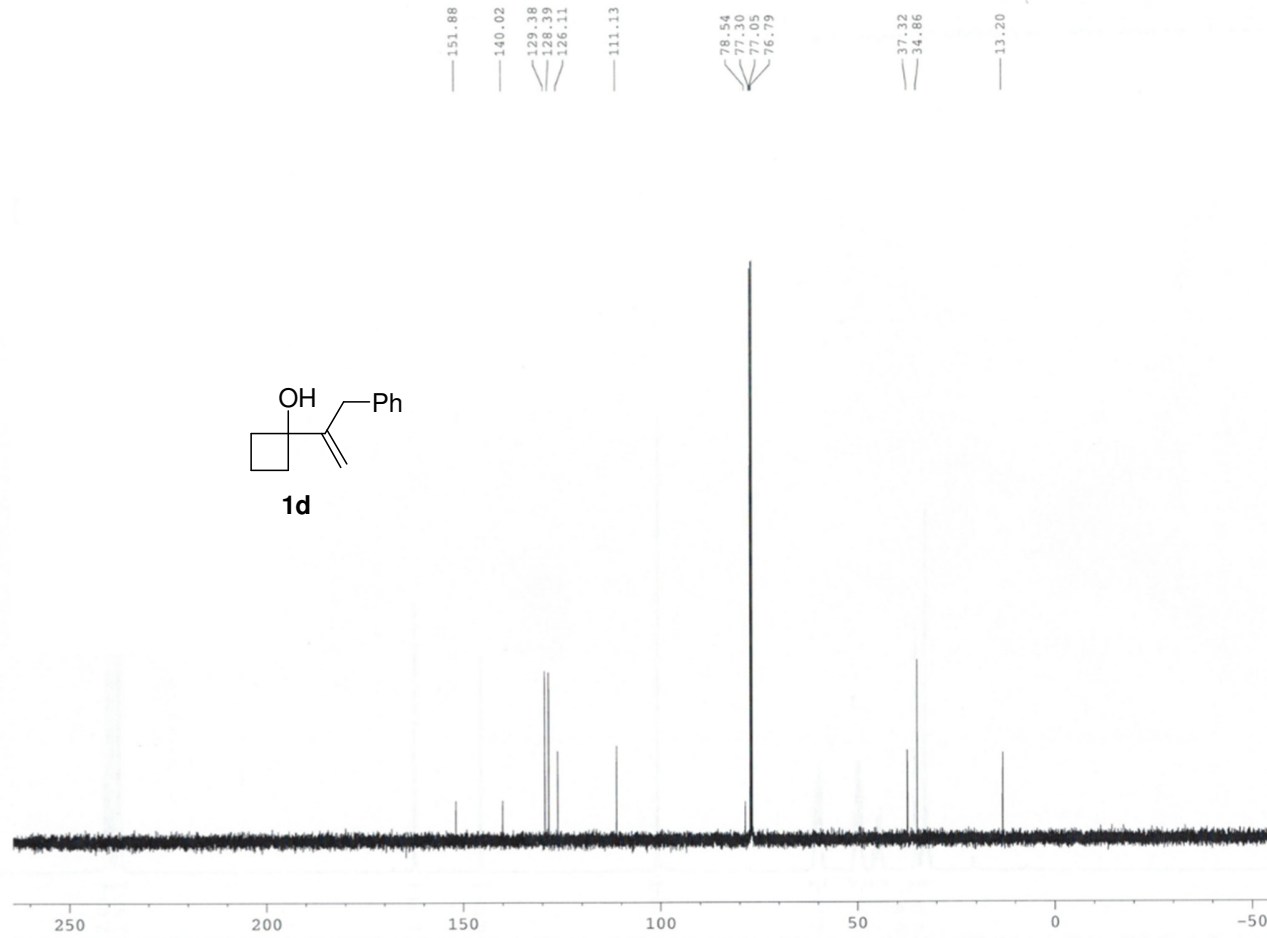

# <sup>1</sup>H NMR spectra of compound 4

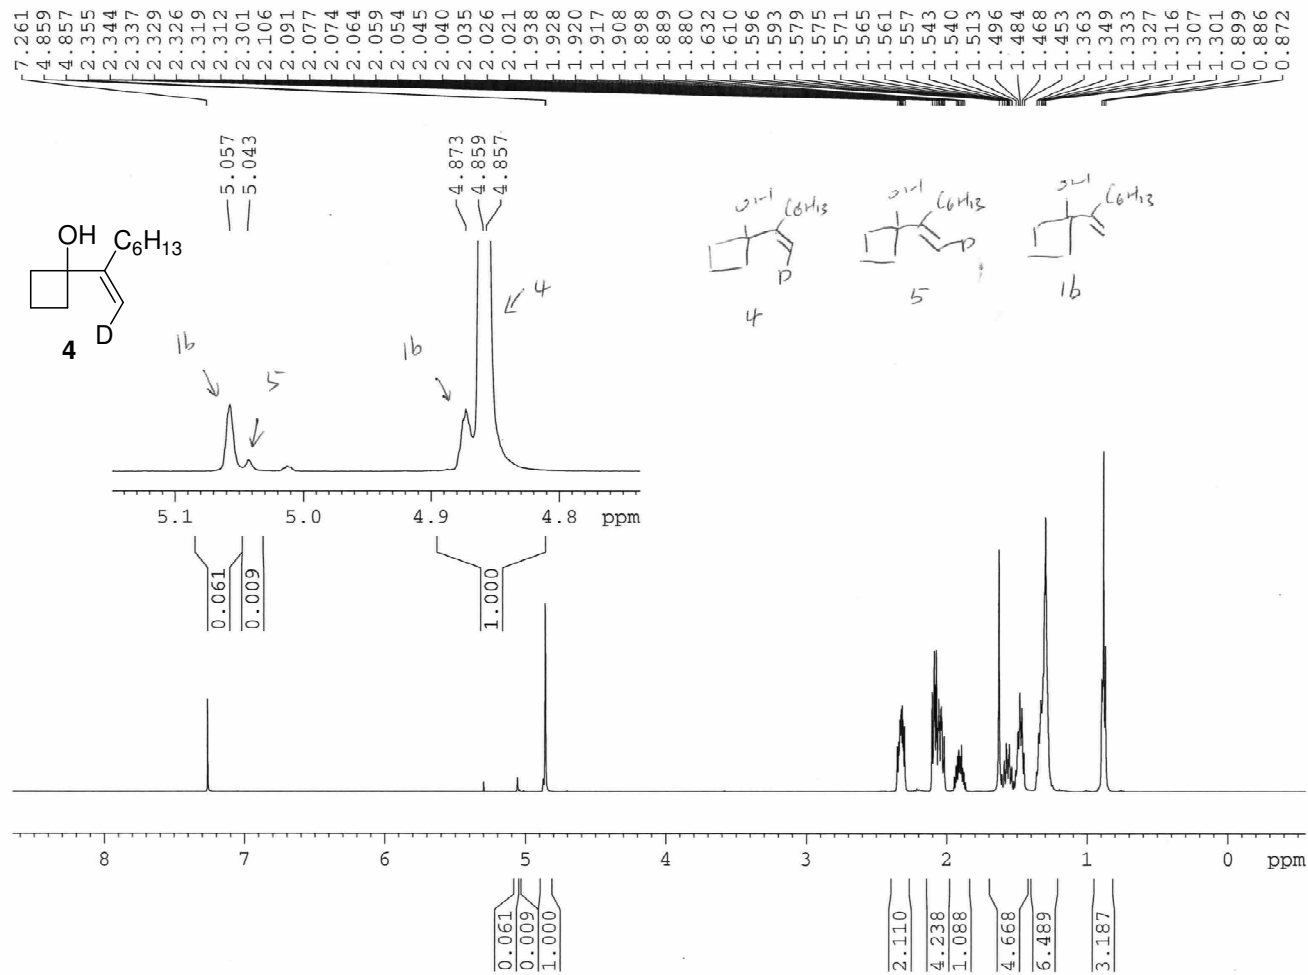

# <sup>13</sup>C NMR spectra of compound **4**

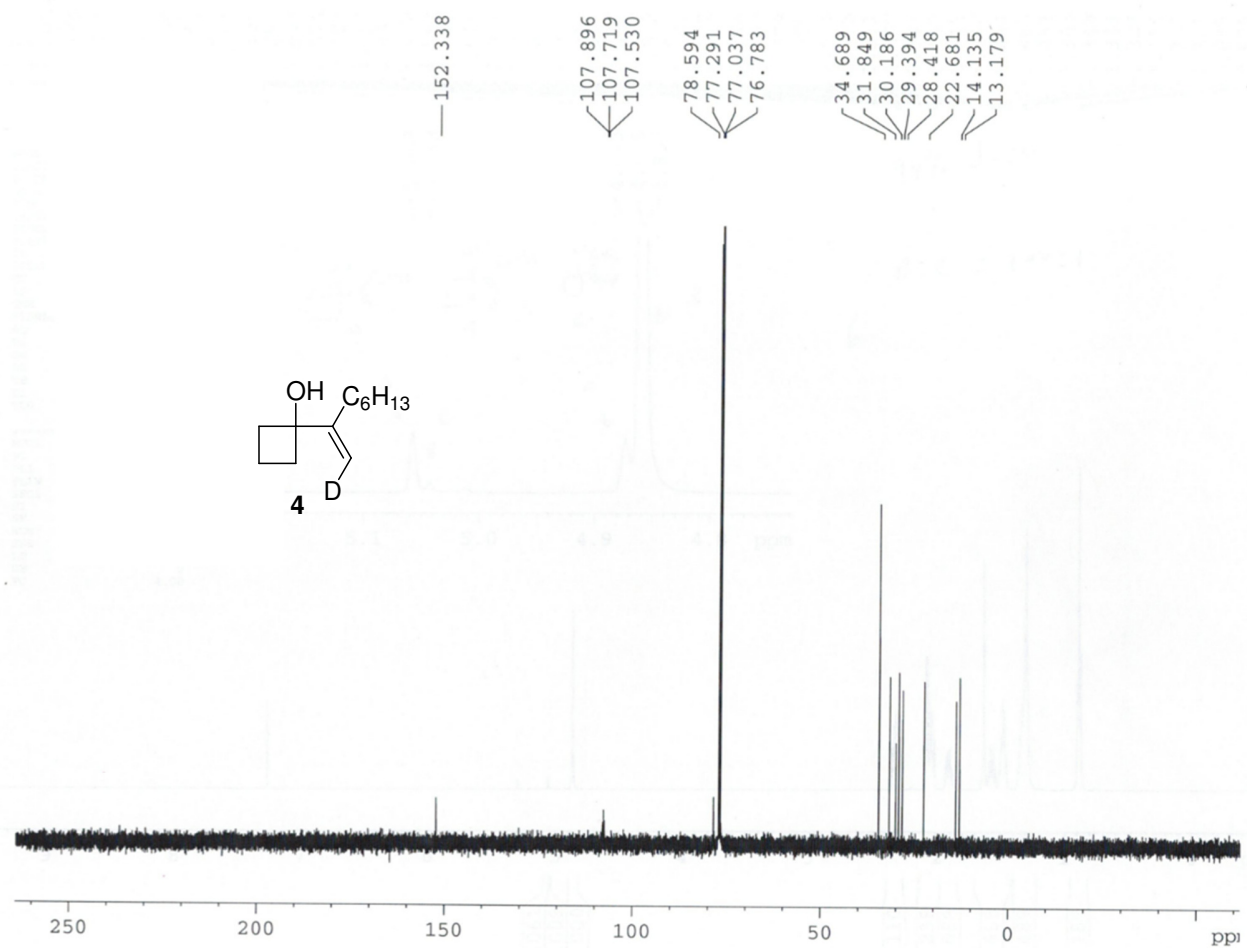

# <sup>1</sup>H NMR spectra of compound 5

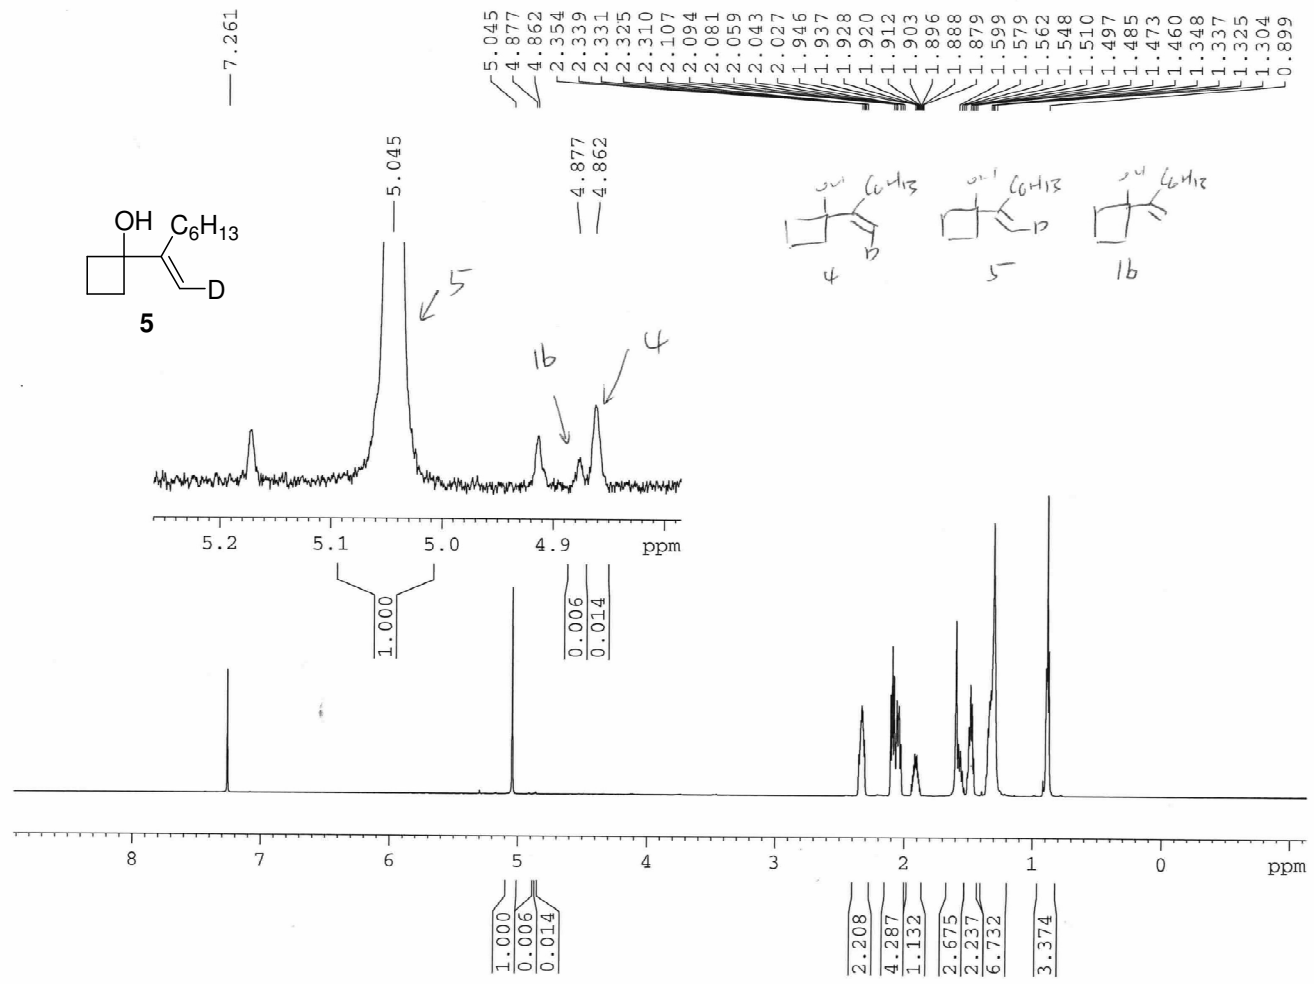

# $^{13}\text{C}$ NMR spectra of compound 5

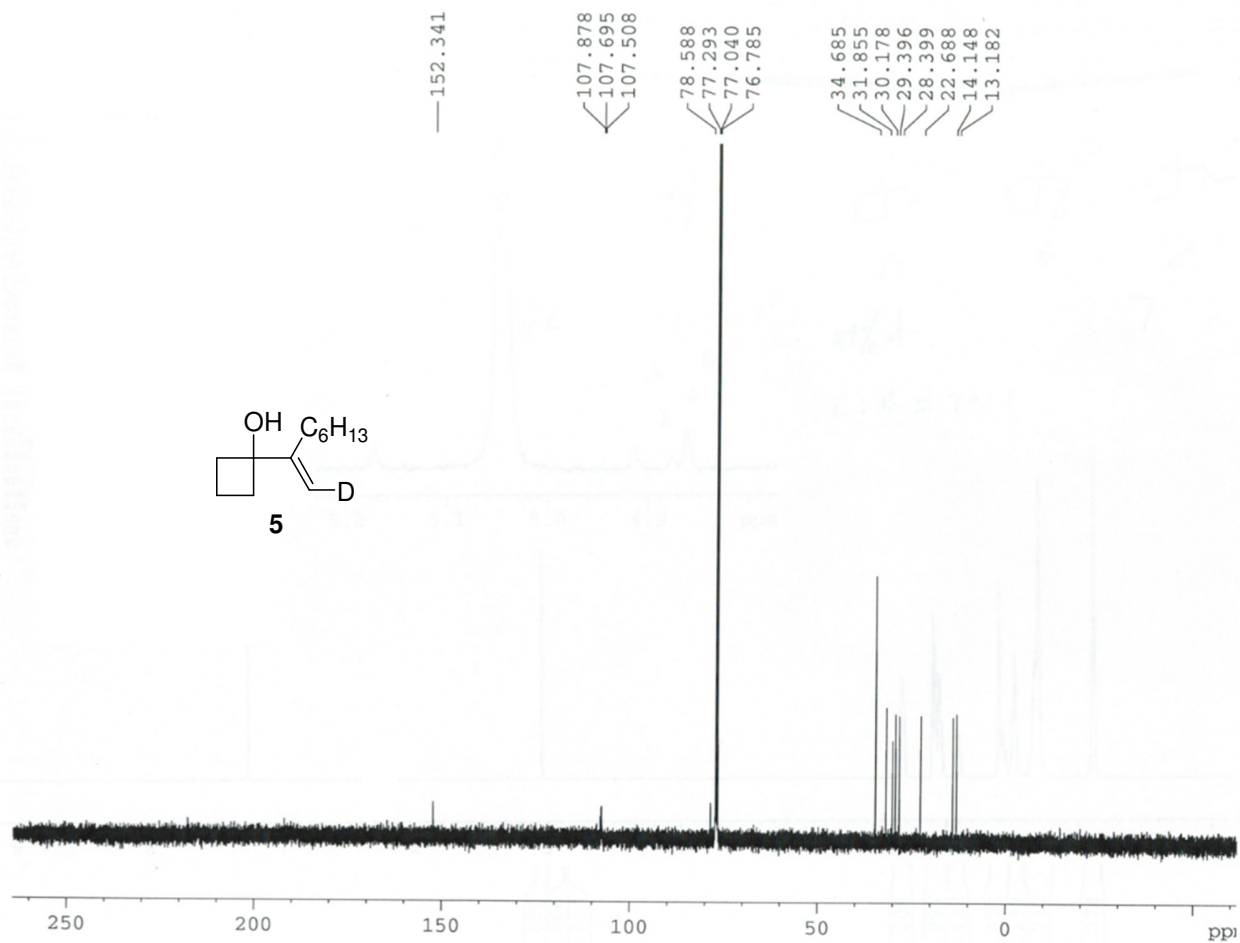



# <sup>1</sup>H NMR spectra of compound **1e**

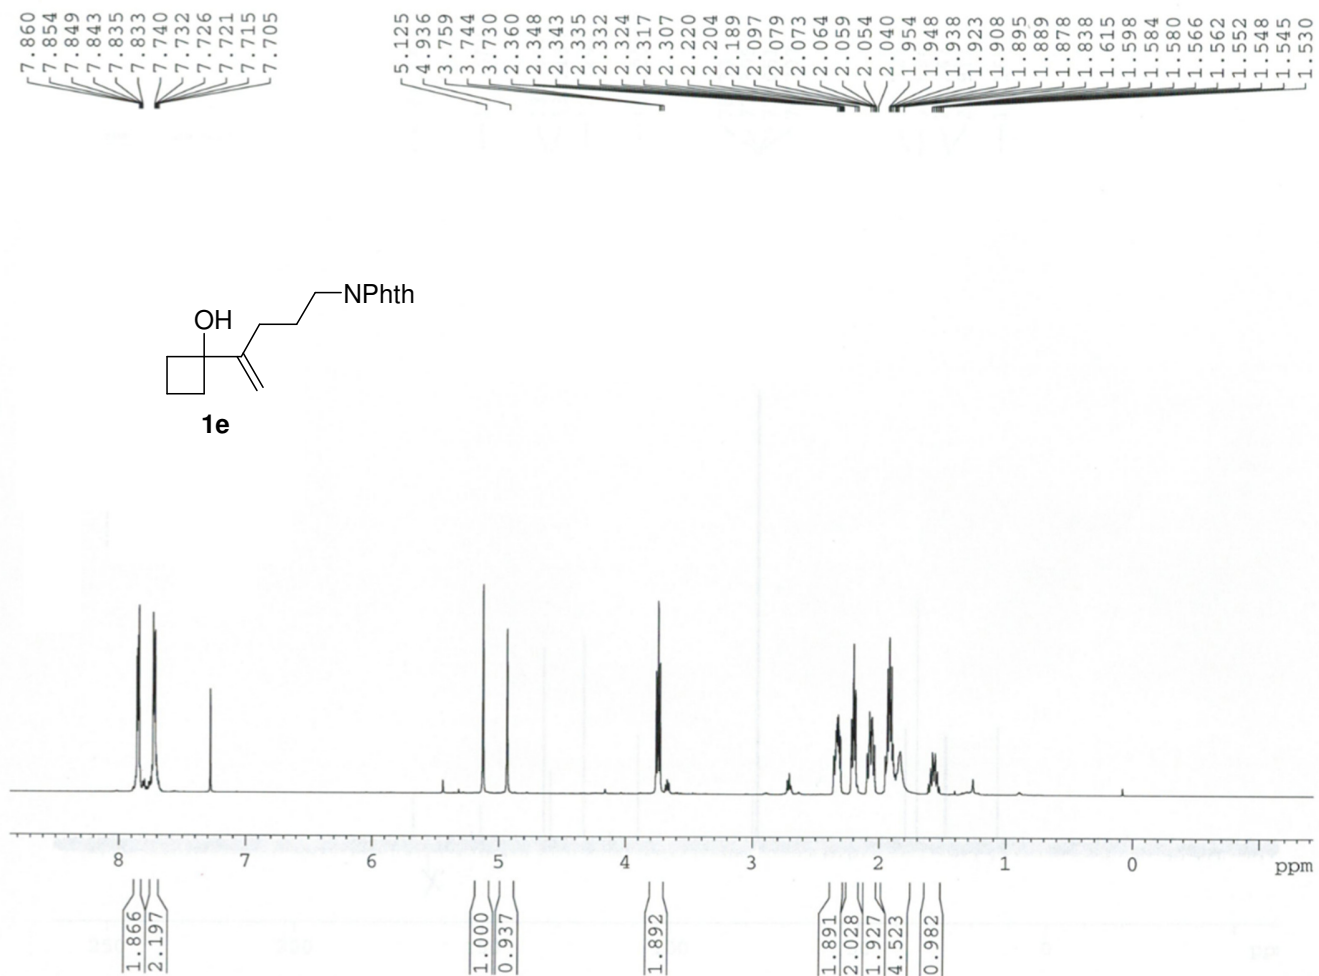

<sup>13</sup>C NMR spectra of compound **1e**

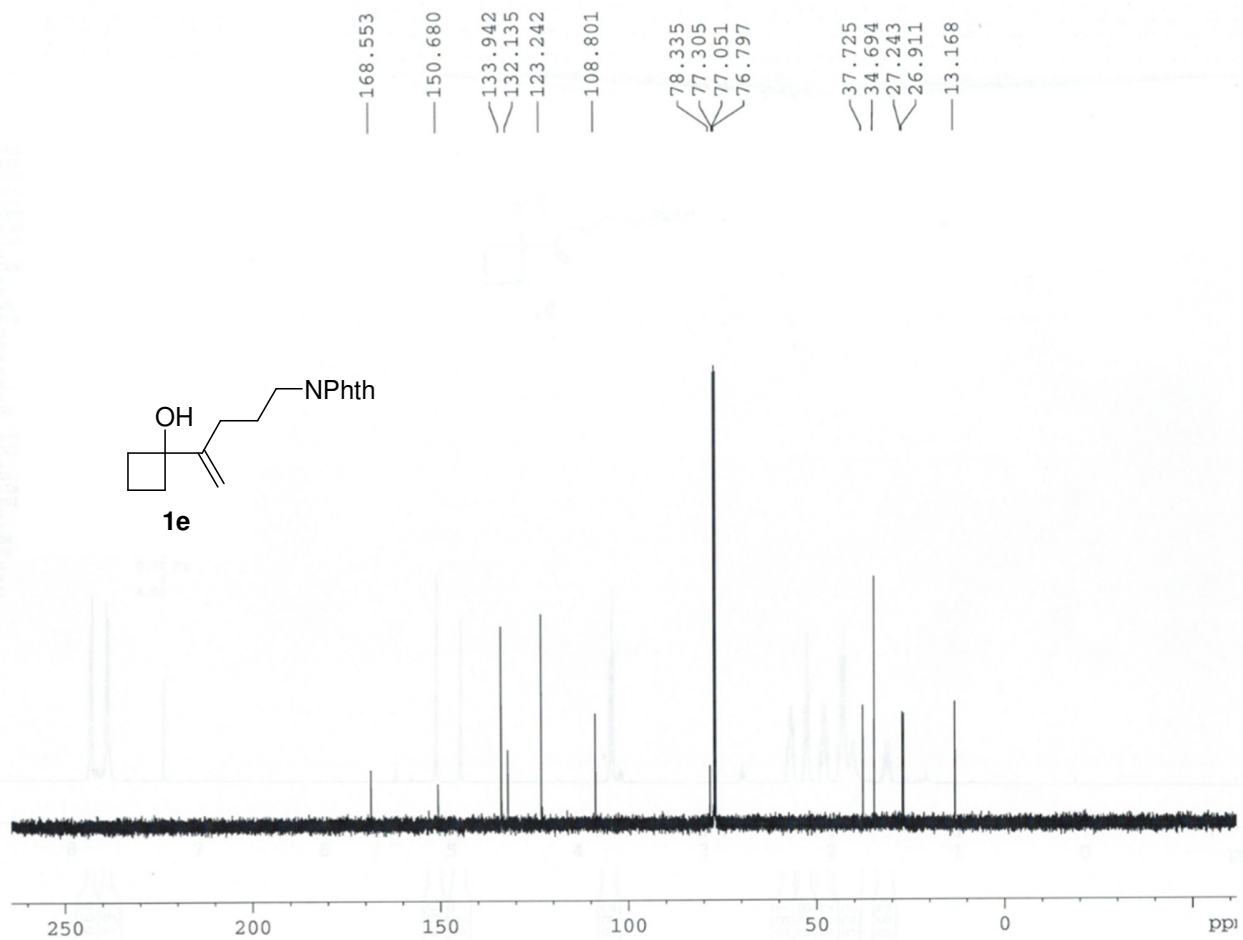

<sup>1</sup>H NMR spectra of compound **1f**

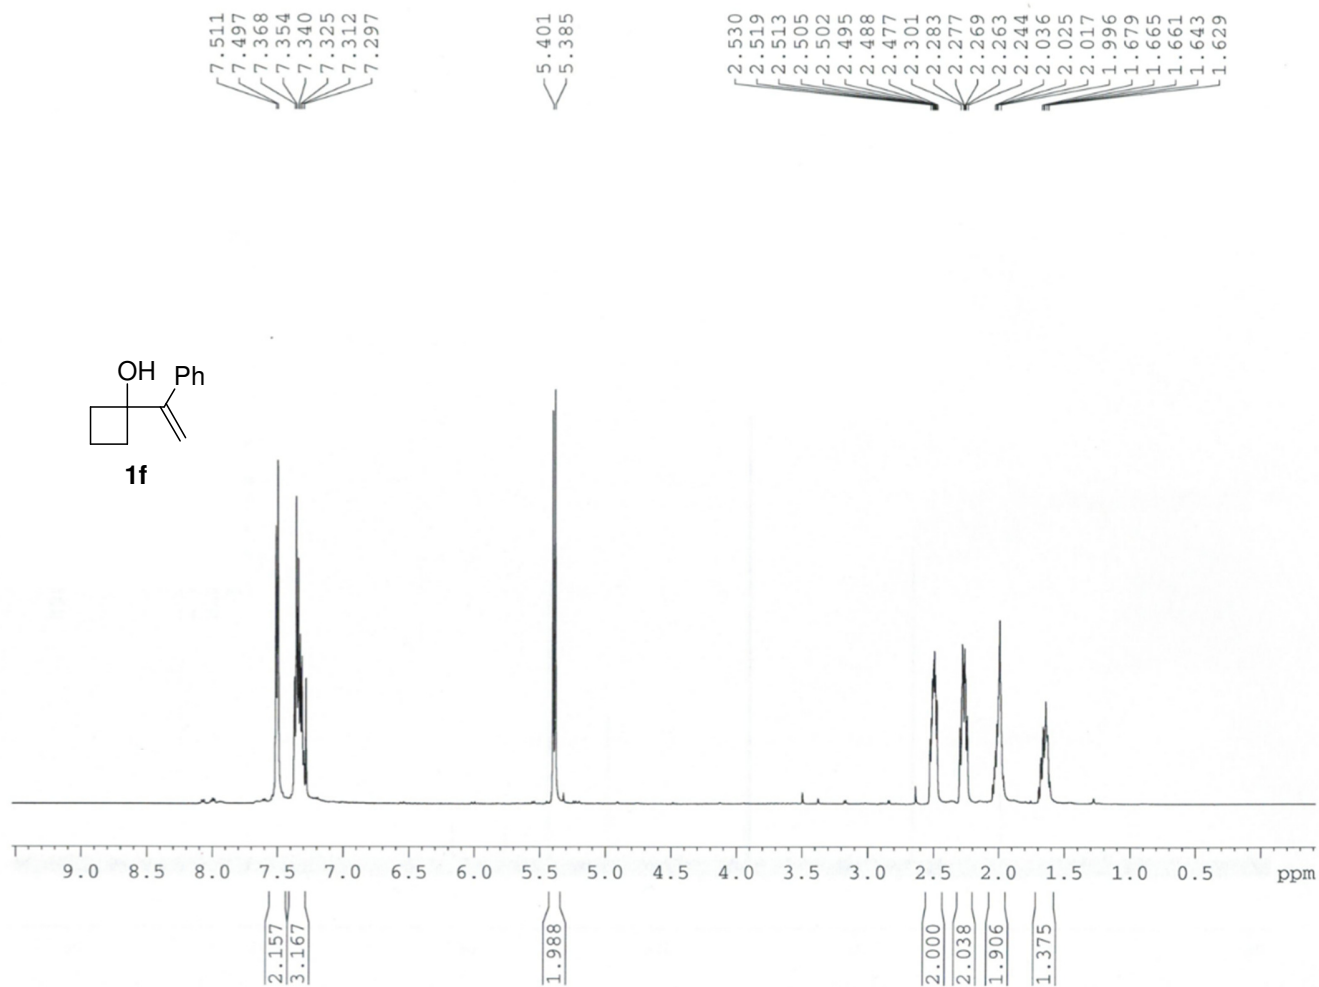

<sup>13</sup>C NMR spectra of compound **1f**

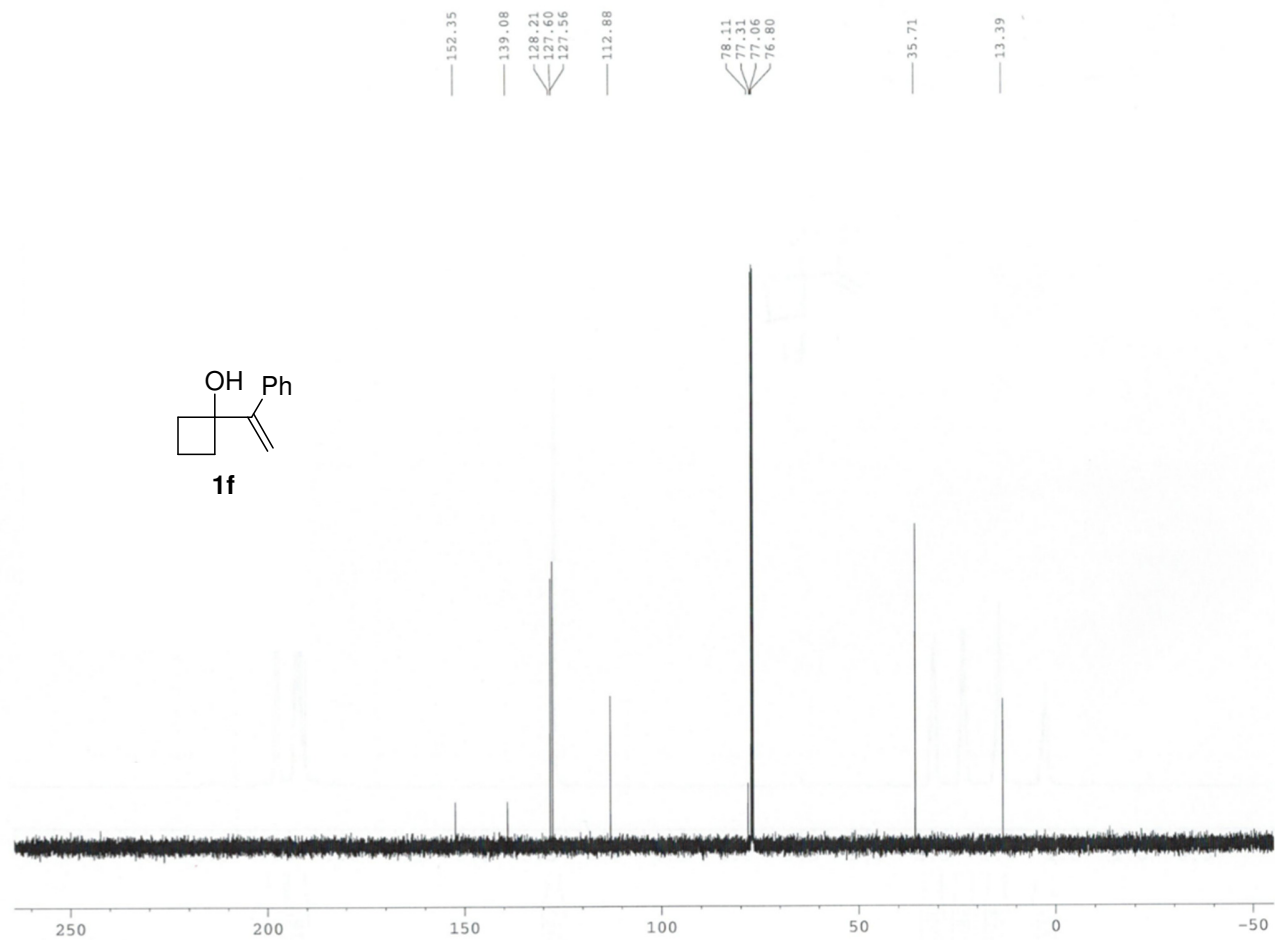

<sup>1</sup>H NMR spectra of compound **1g**

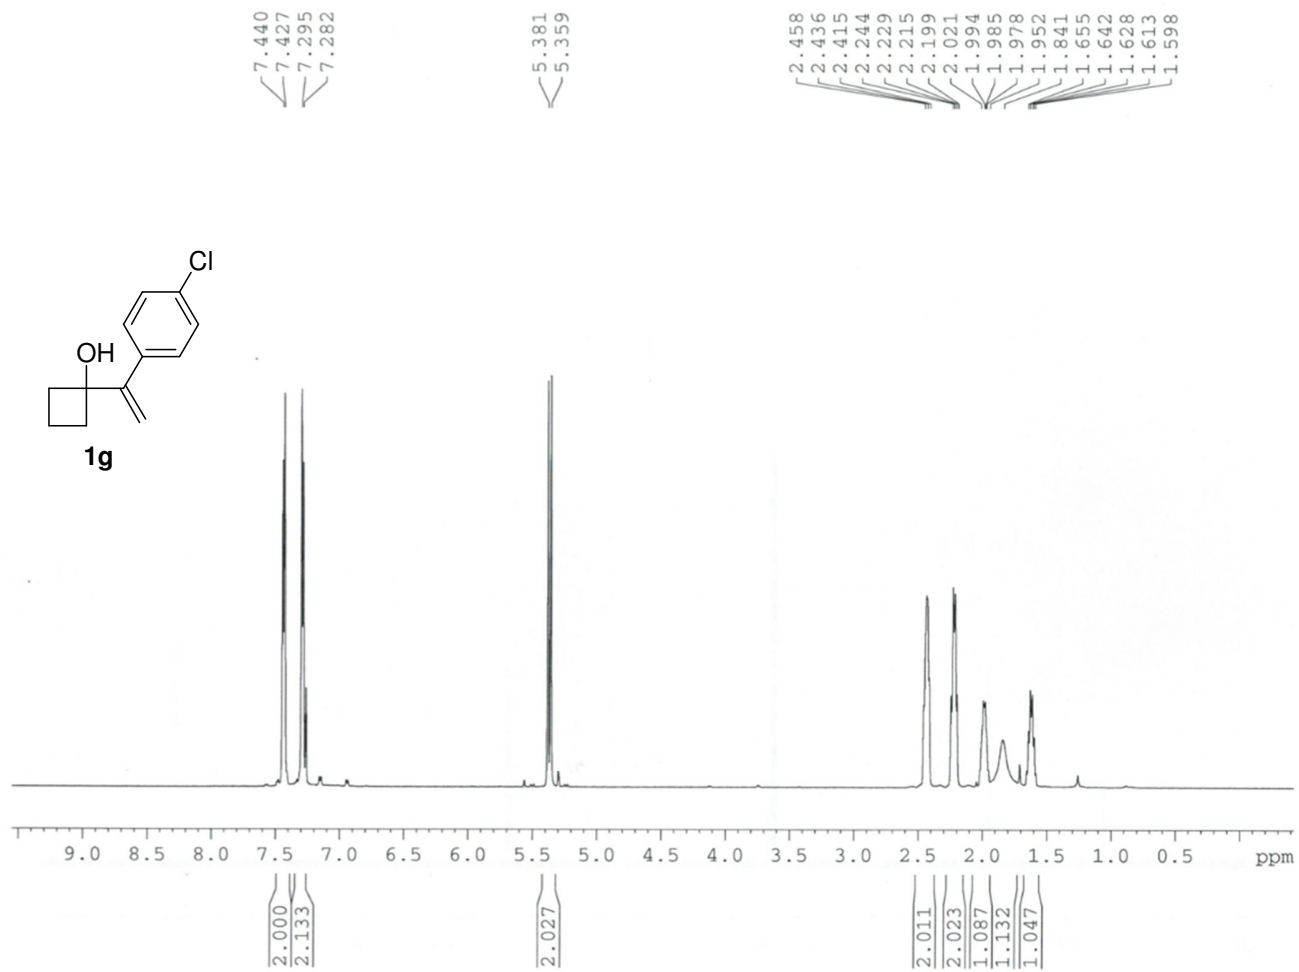

<sup>13</sup>C NMR spectra of compound **1g**

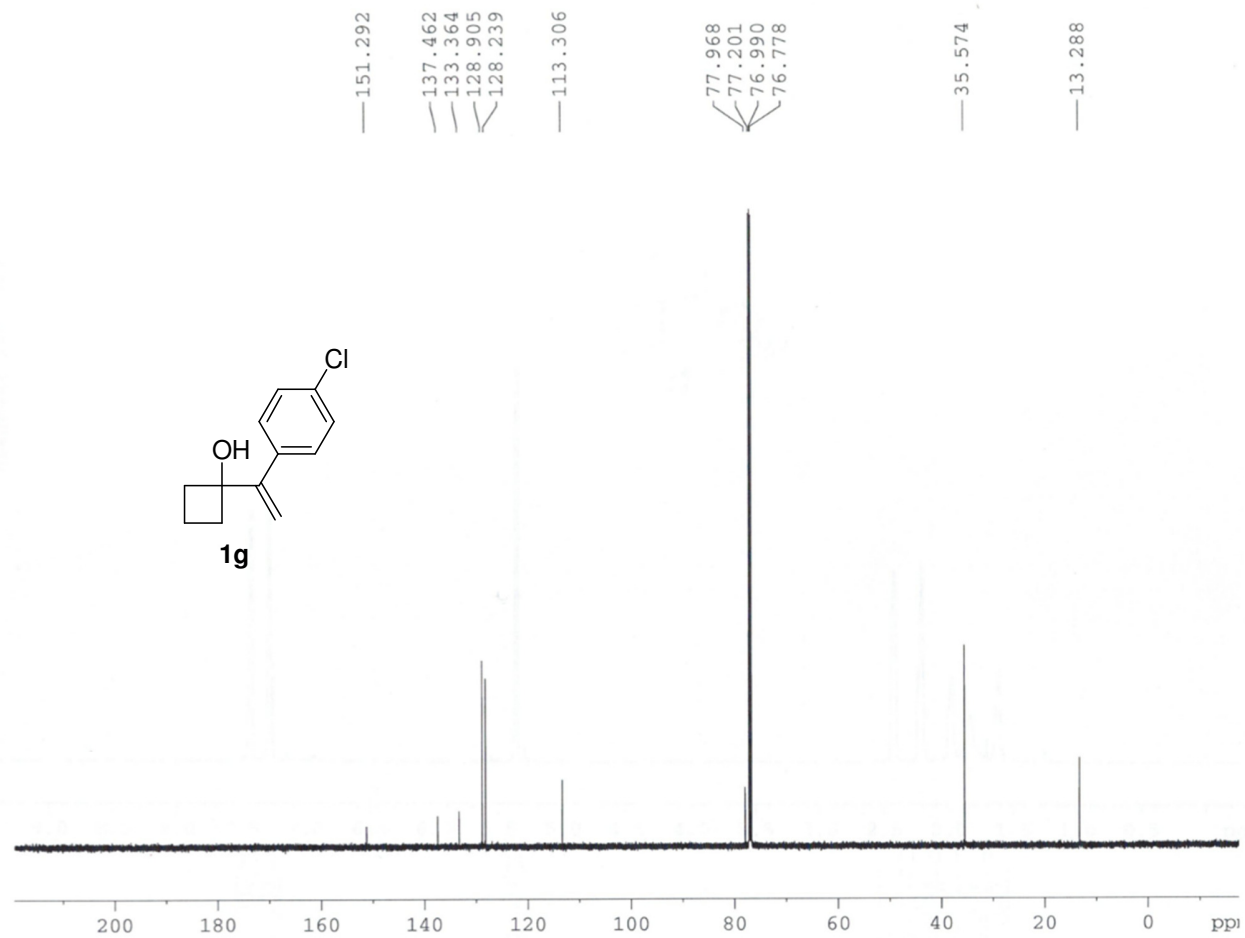

<sup>1</sup>H NMR spectra of compound **1h**

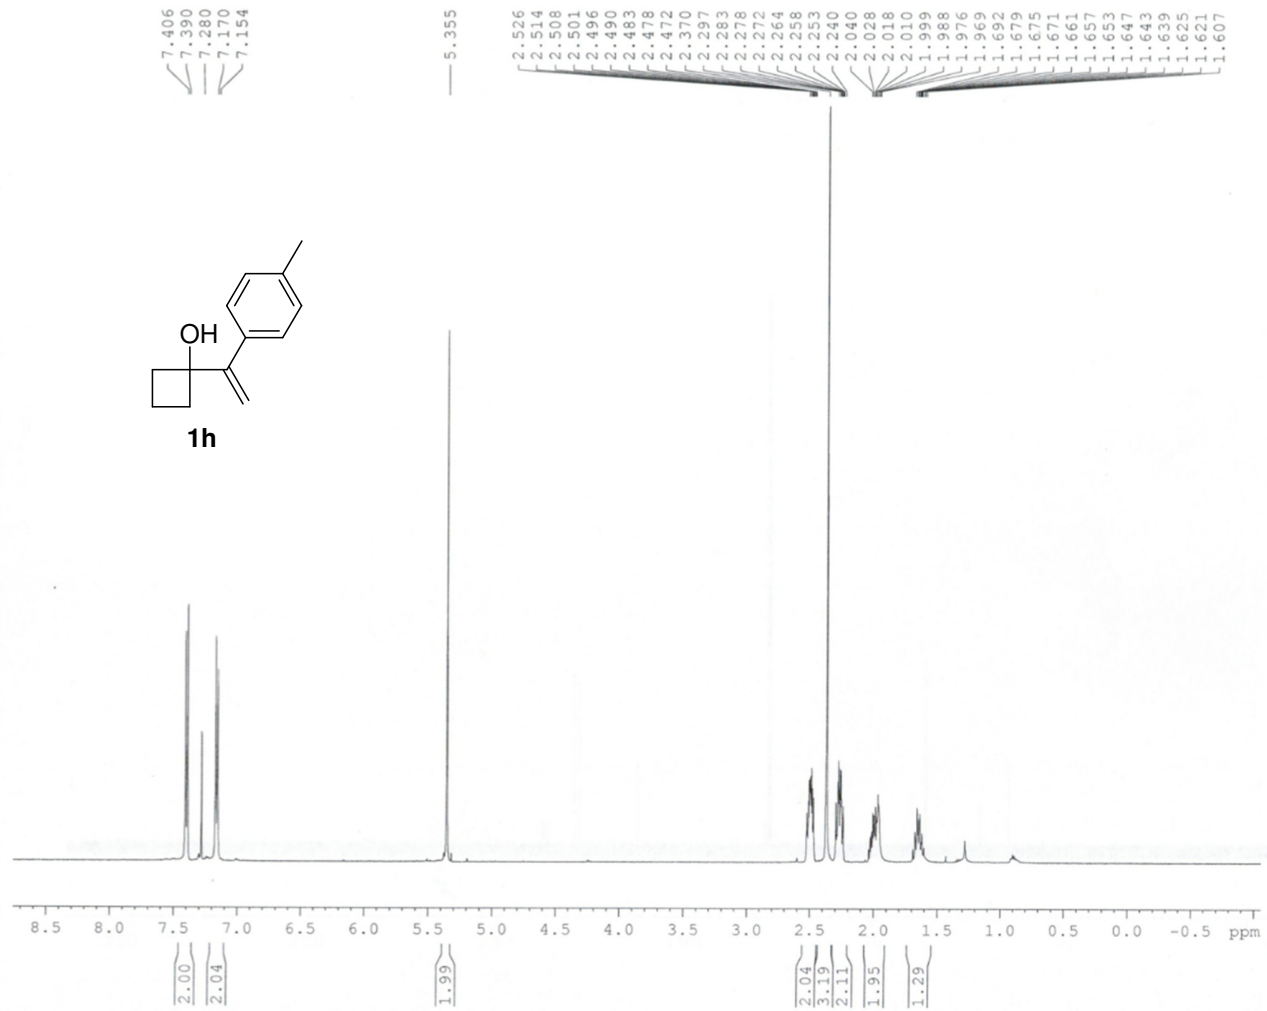

<sup>13</sup>C NMR spectra of compound **1h**

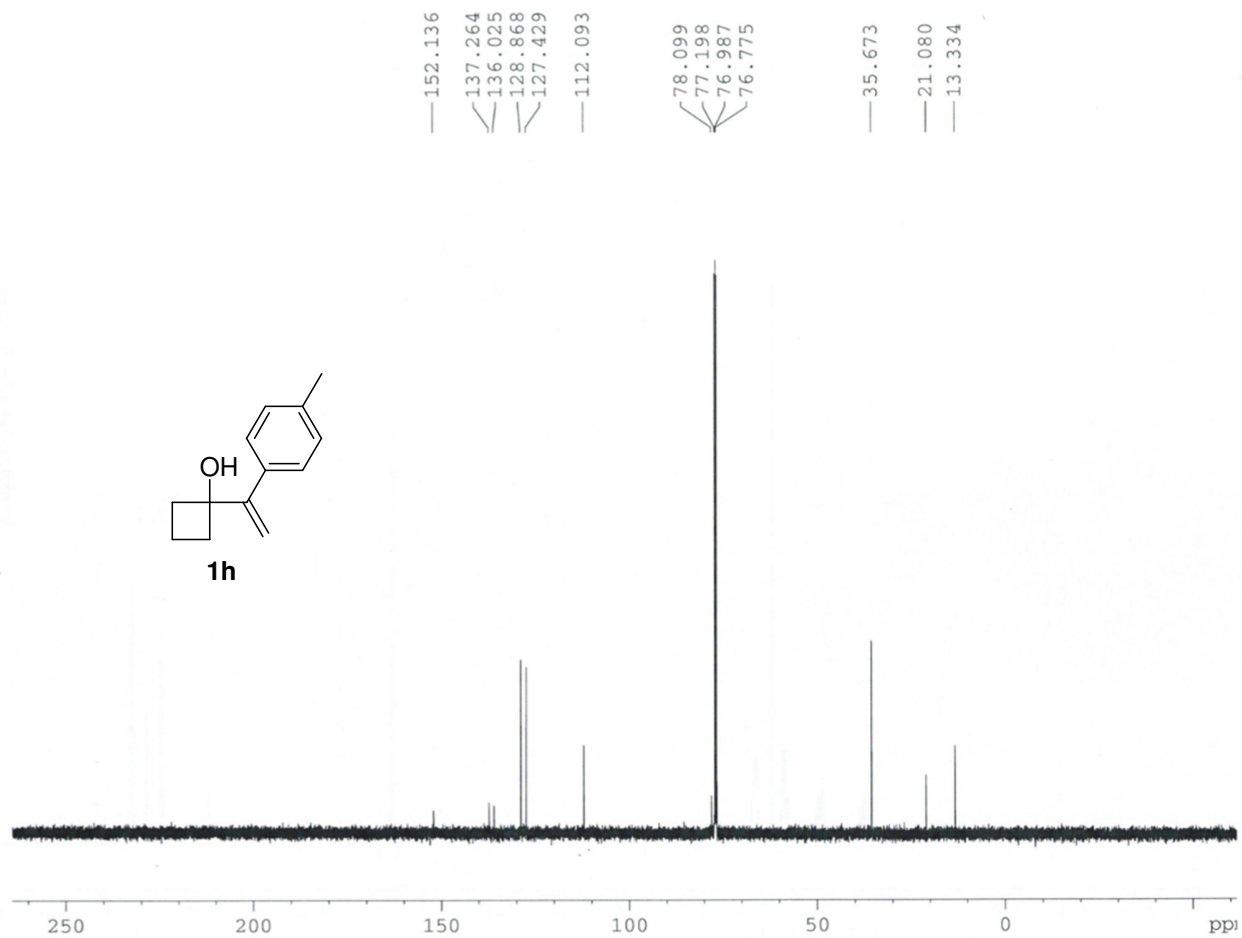



<sup>1</sup>H NMR spectra of compound **1i**

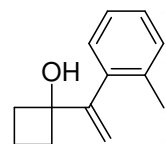

**1i**

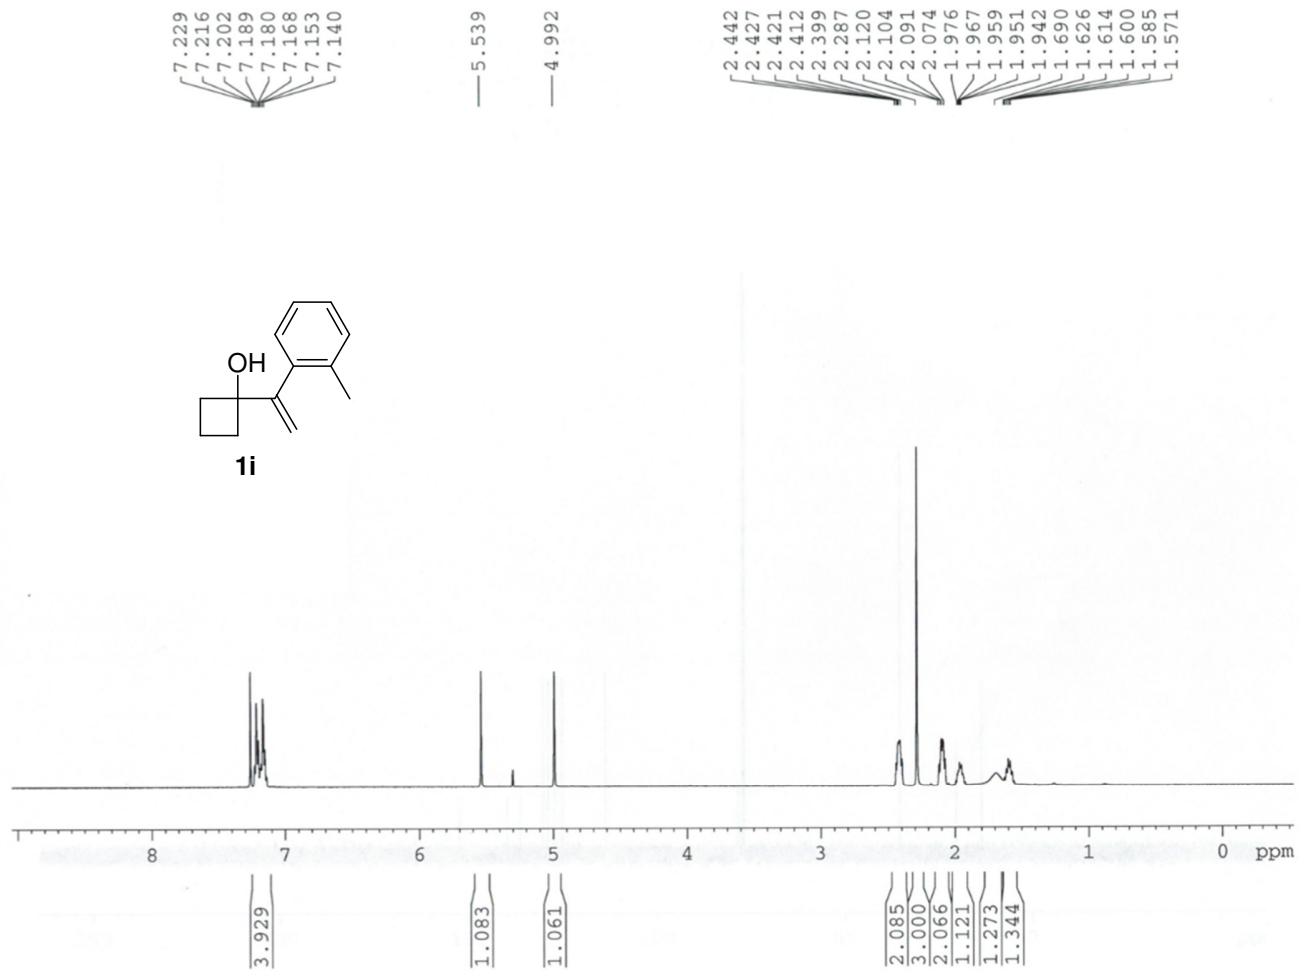

<sup>13</sup>C NMR spectra of compound **1i**

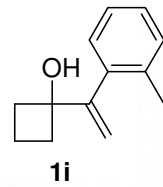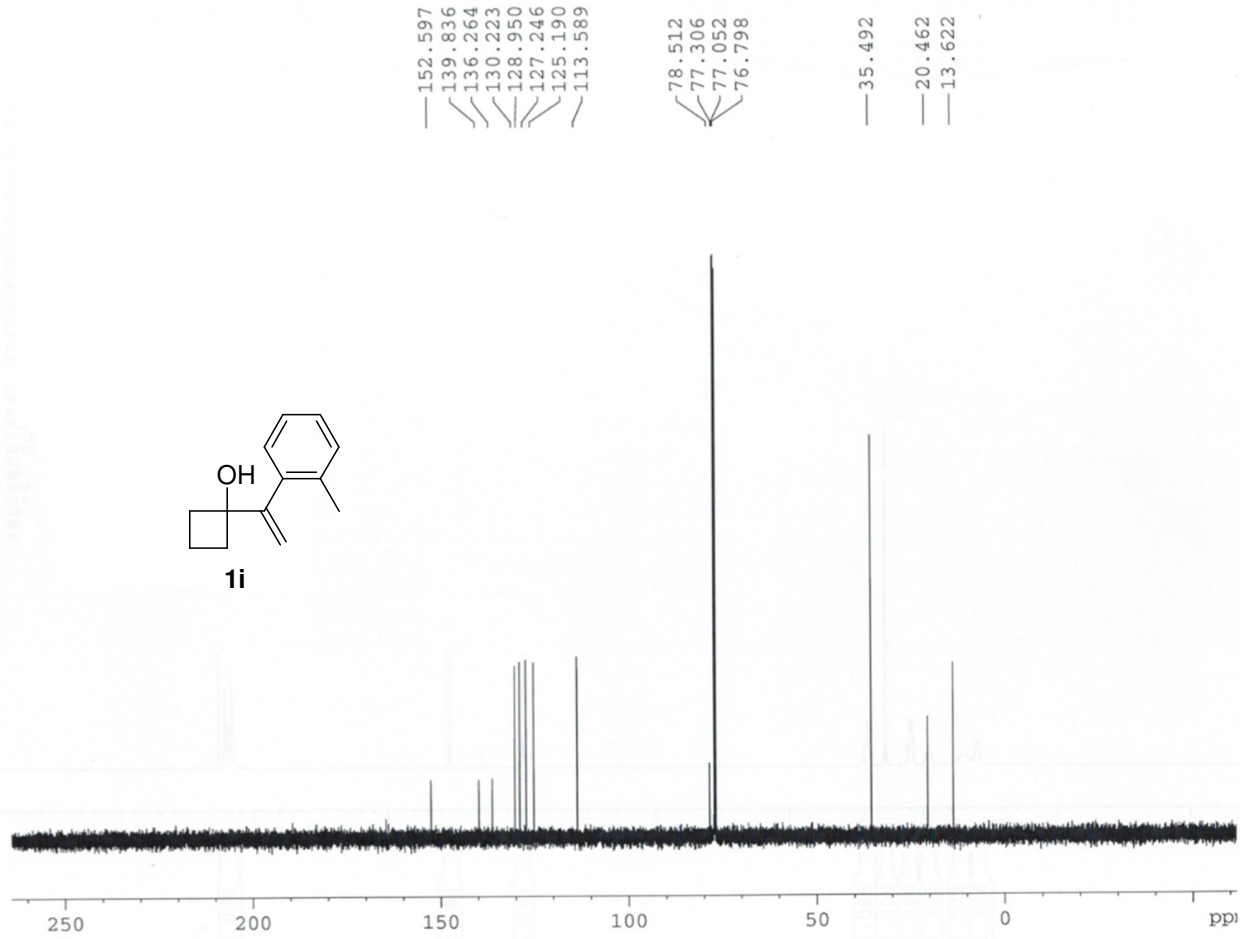

<sup>1</sup>H NMR spectra of compound **1j**

7.64  
7.62  
7.40  
7.39  
7.37  
7.35  
7.33  
7.32  
7.28

5.37  
5.30

2.17

1.12  
1.11  
1.10  
0.97  
0.96  
0.95

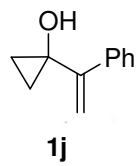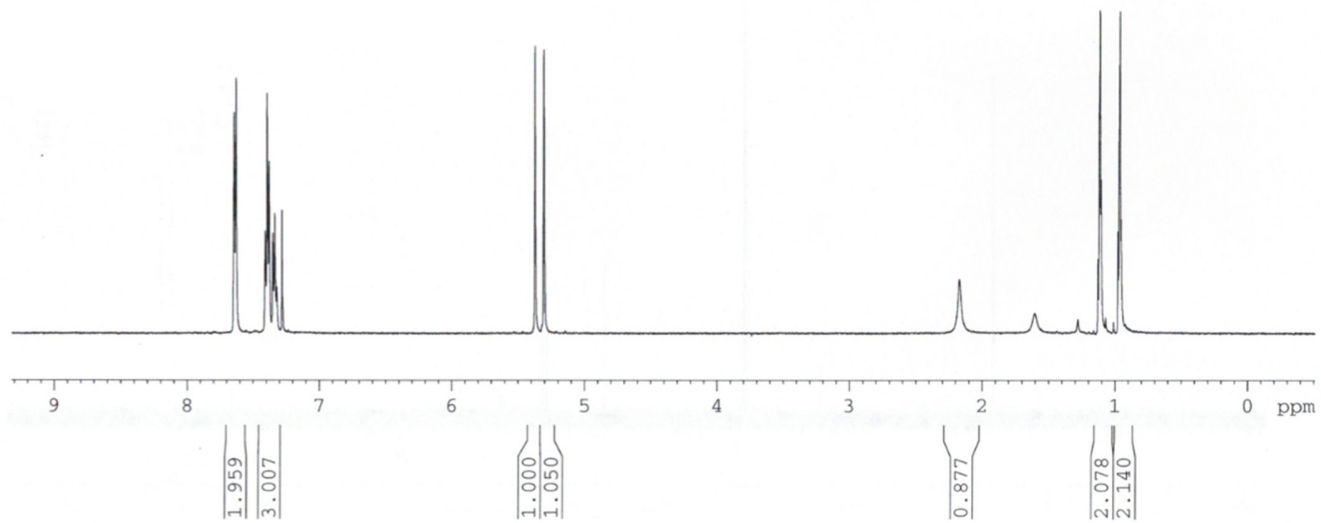

<sup>13</sup>C NMR spectra of compound **1j**

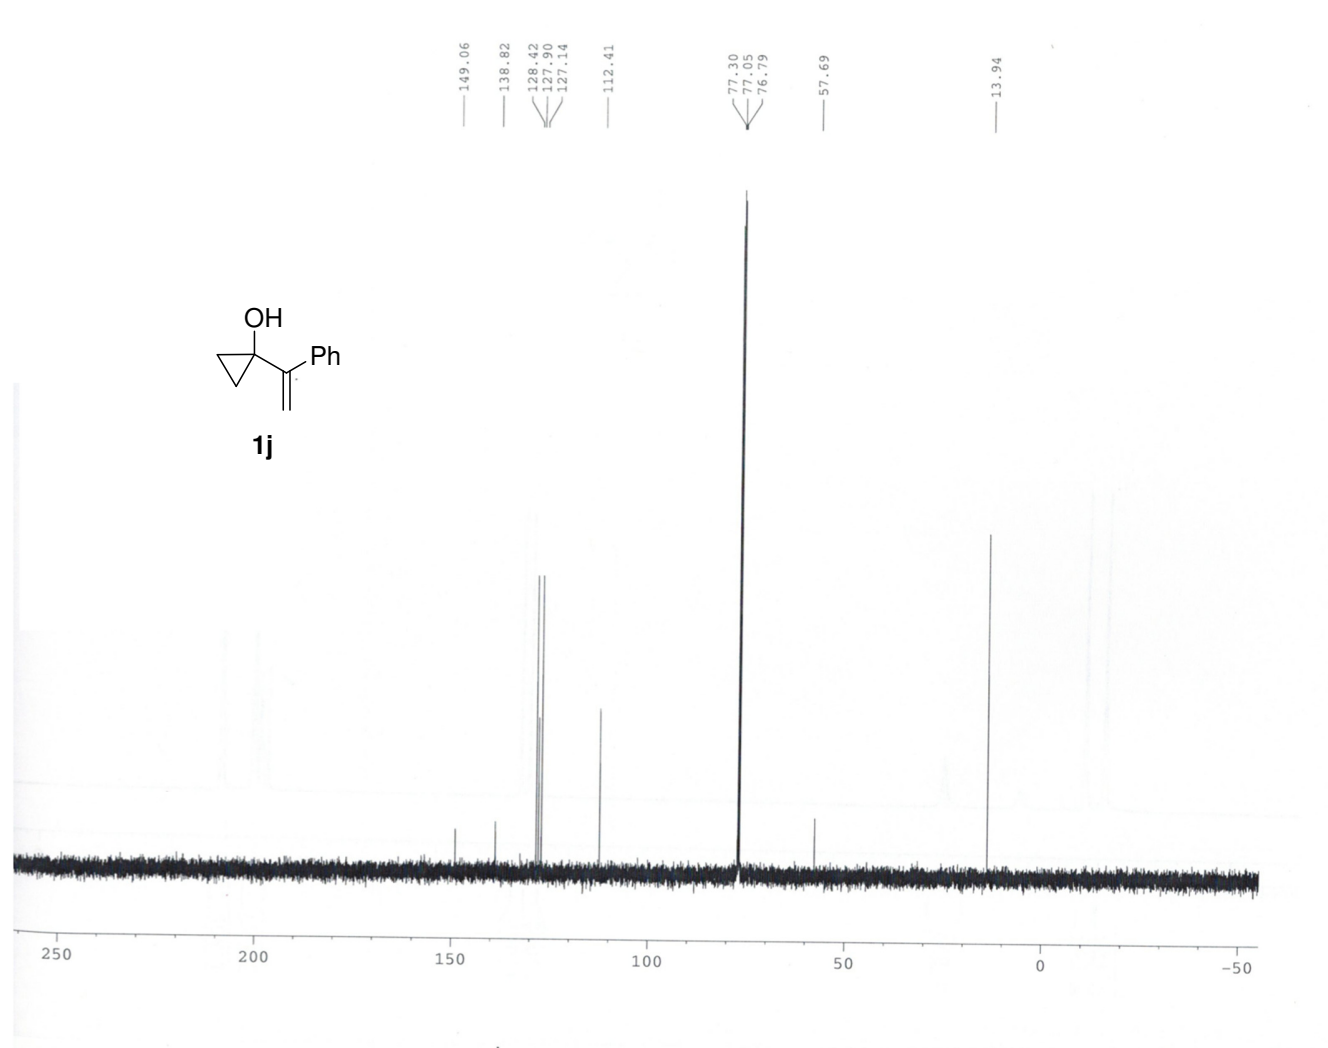

<sup>1</sup>H NMR spectra of compound **1k**

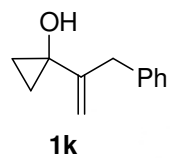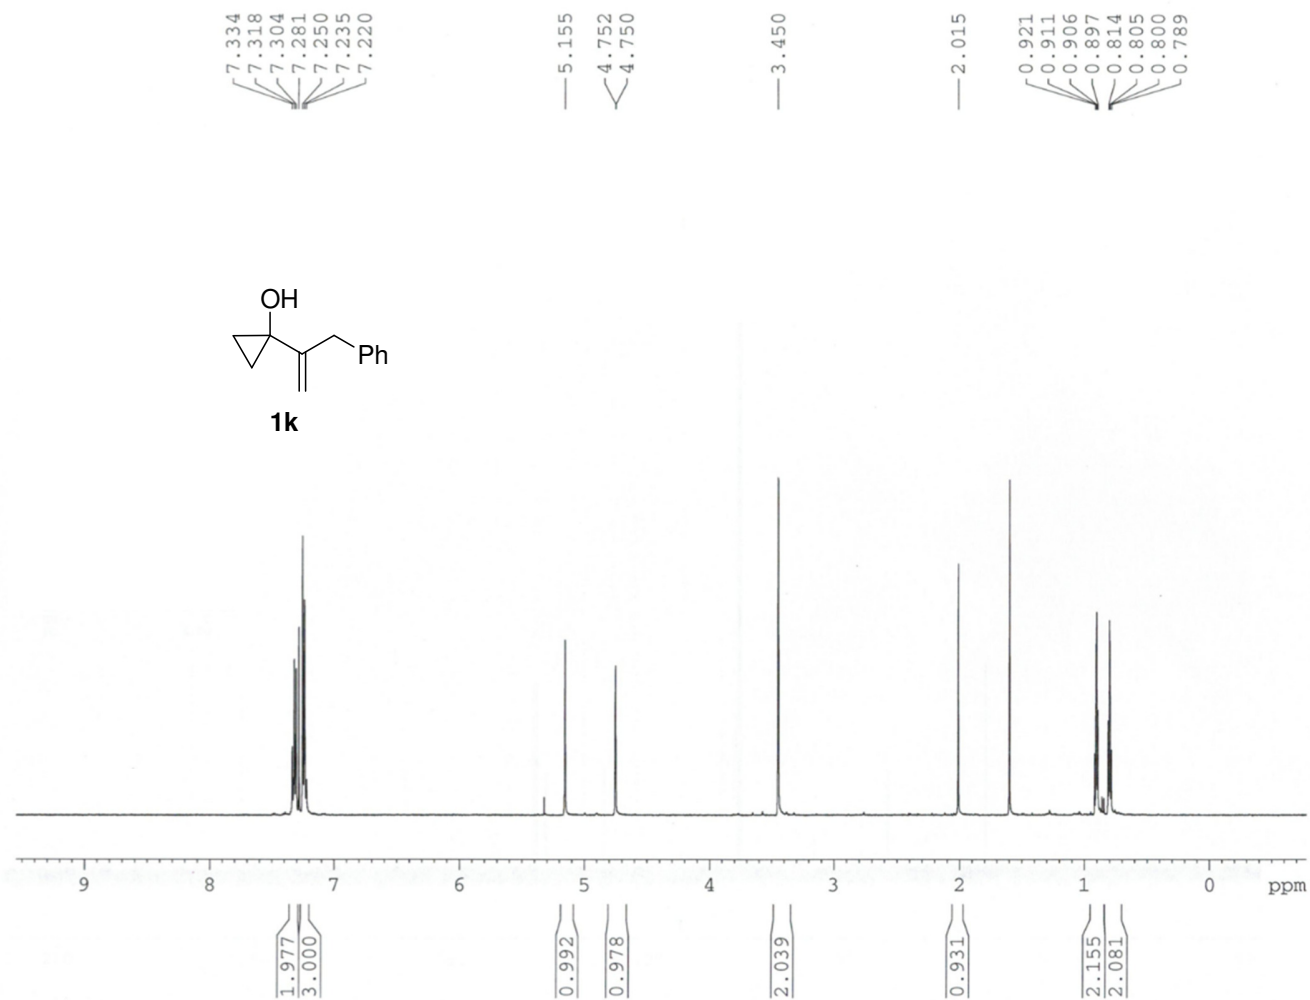

<sup>13</sup>C NMR spectra of compound **1k**

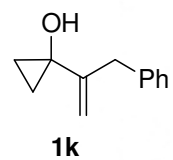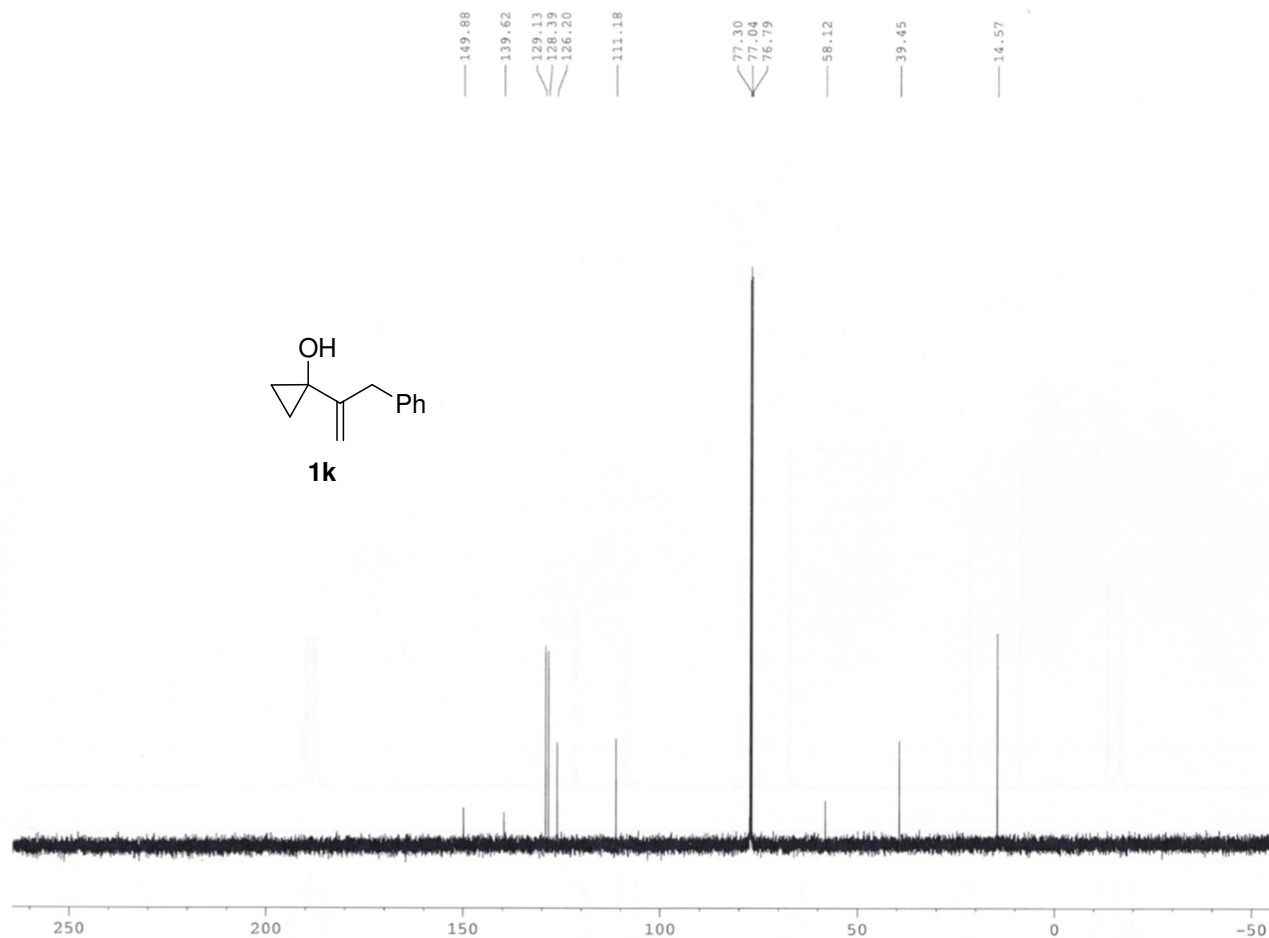

<sup>1</sup>H NMR spectra of compound **12b**

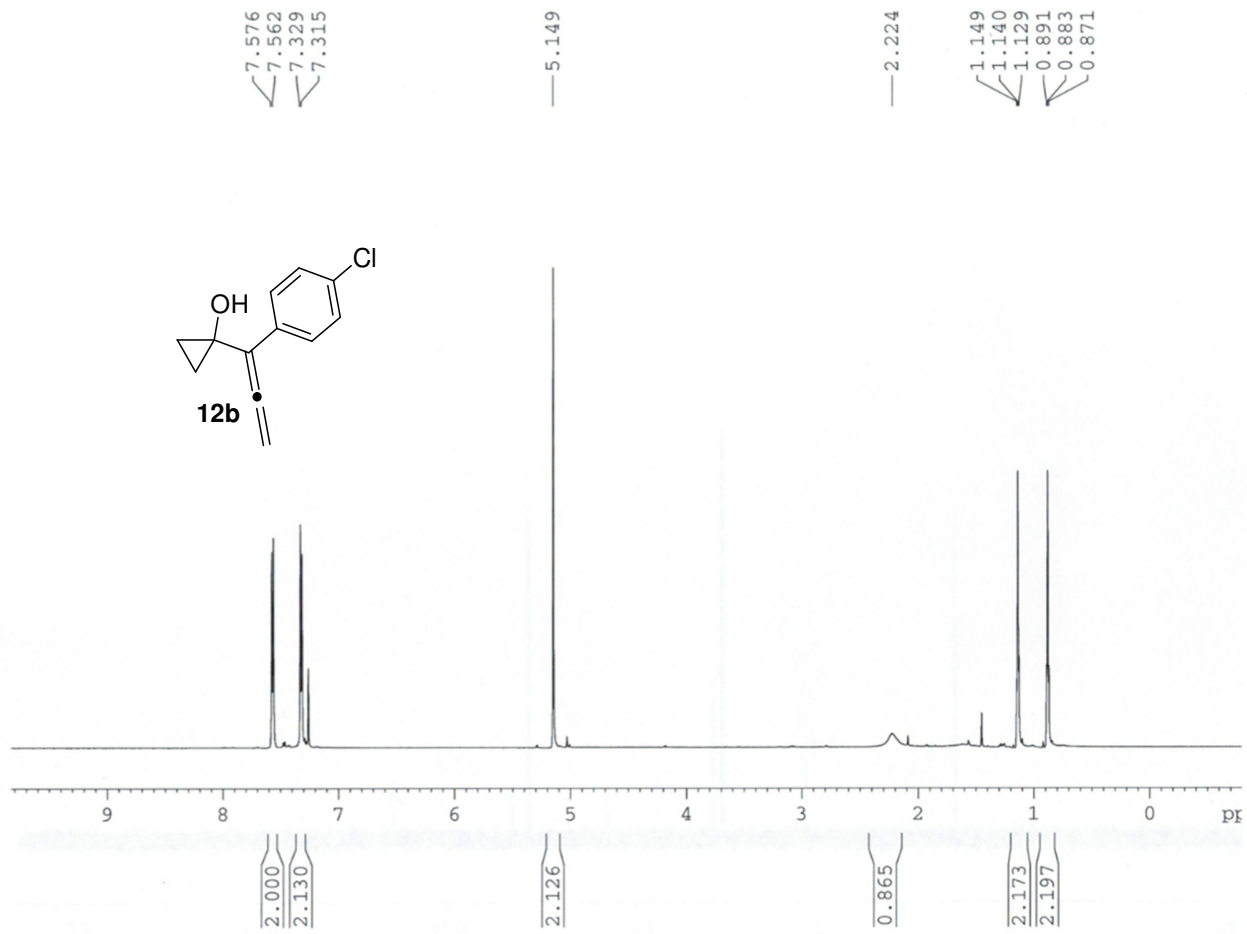

<sup>13</sup>C NMR spectra of compound **12b**

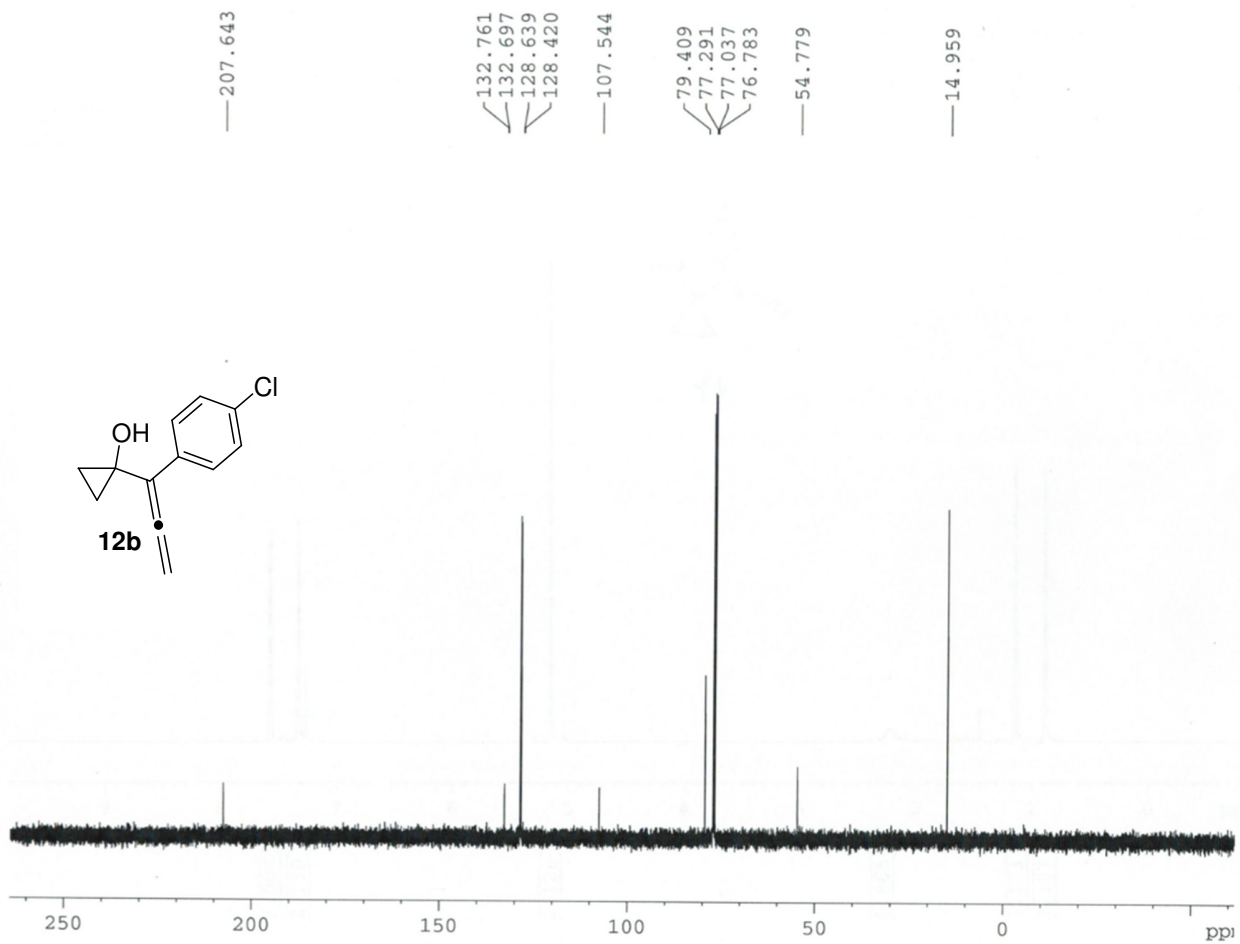



<sup>1</sup>H NMR spectra of compound **3aa**

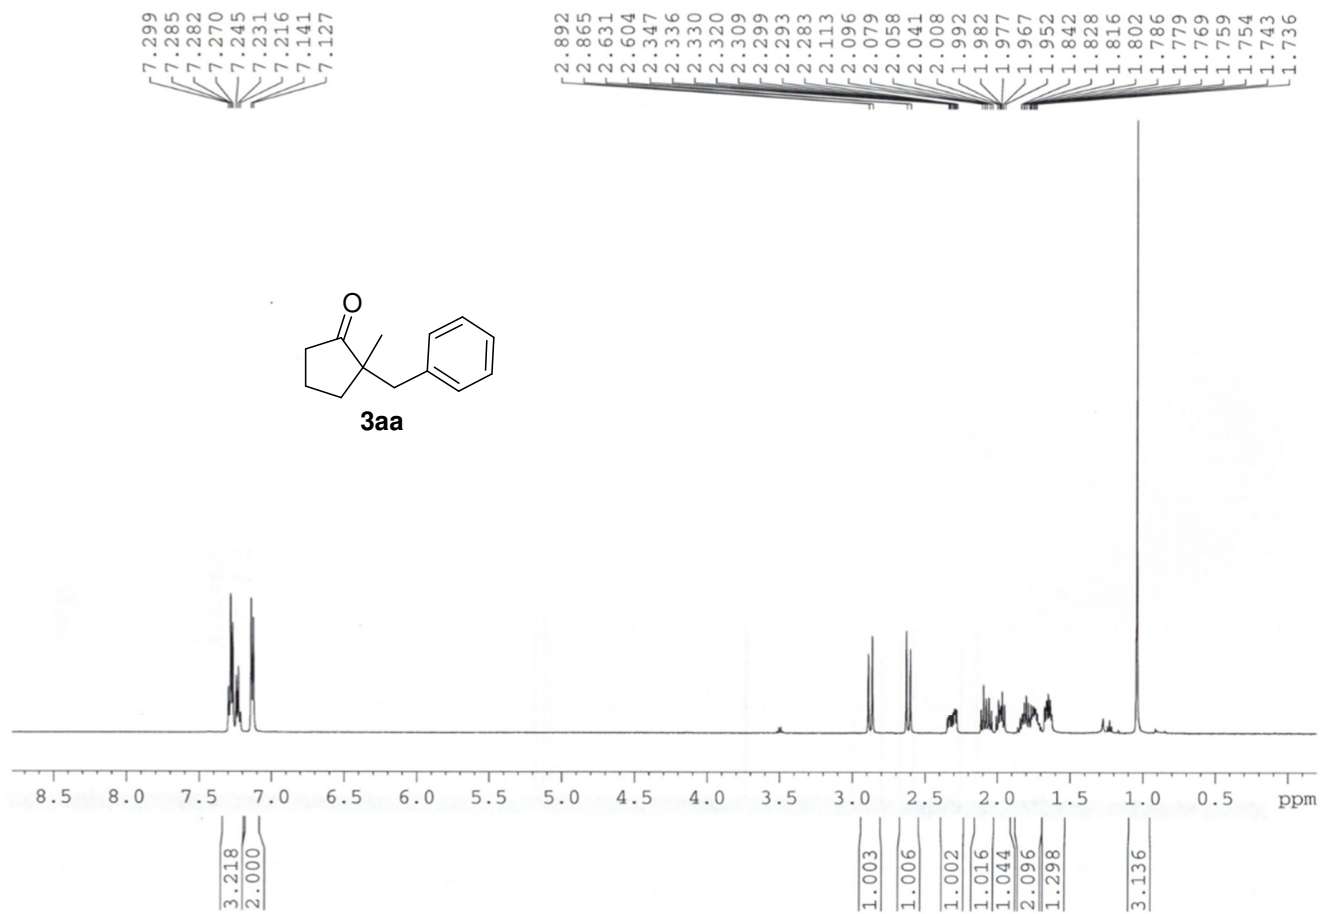

<sup>13</sup>C NMR spectra of compound **3aa**

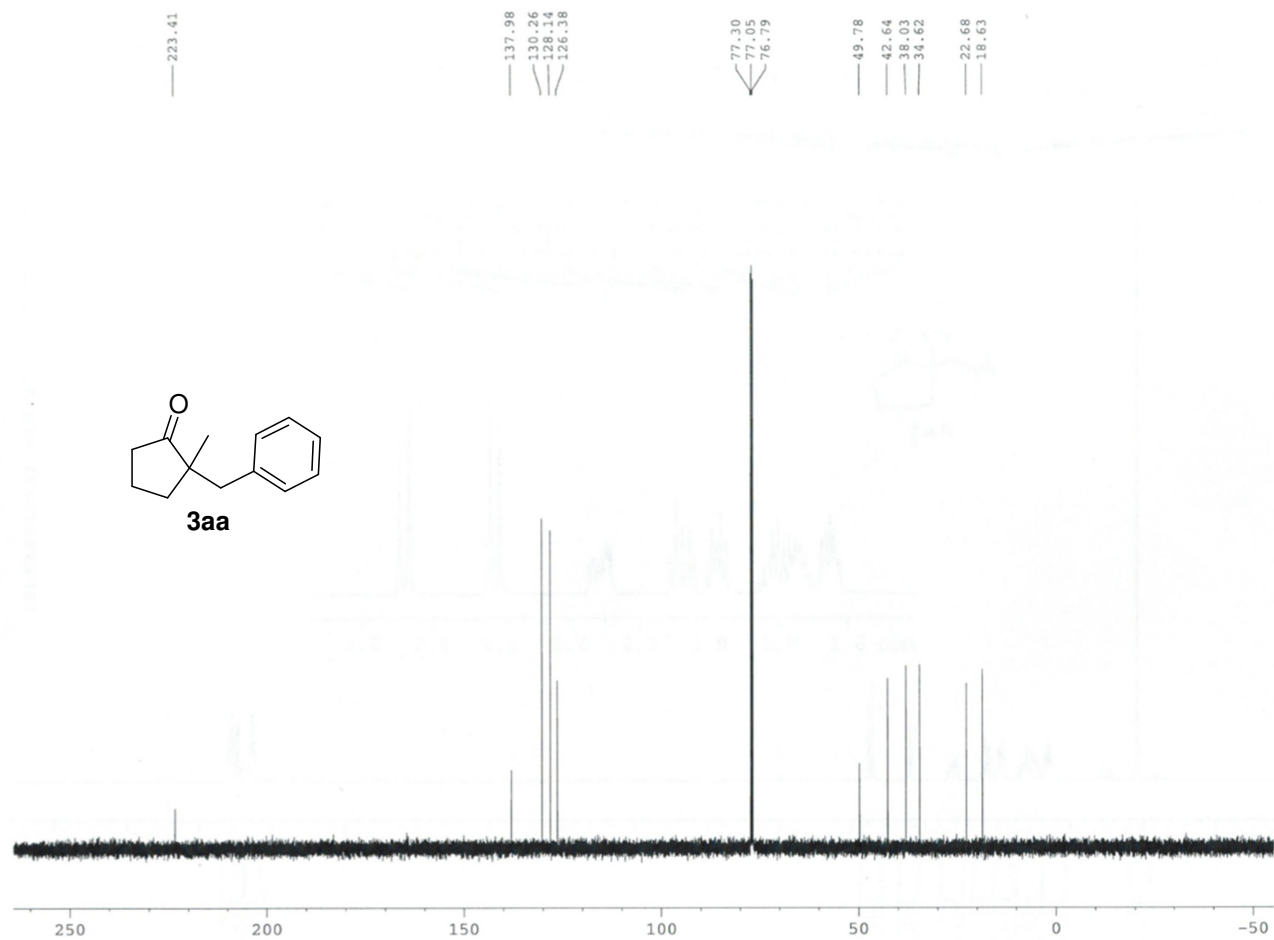

<sup>1</sup>H NMR spectra of compound **3ab**

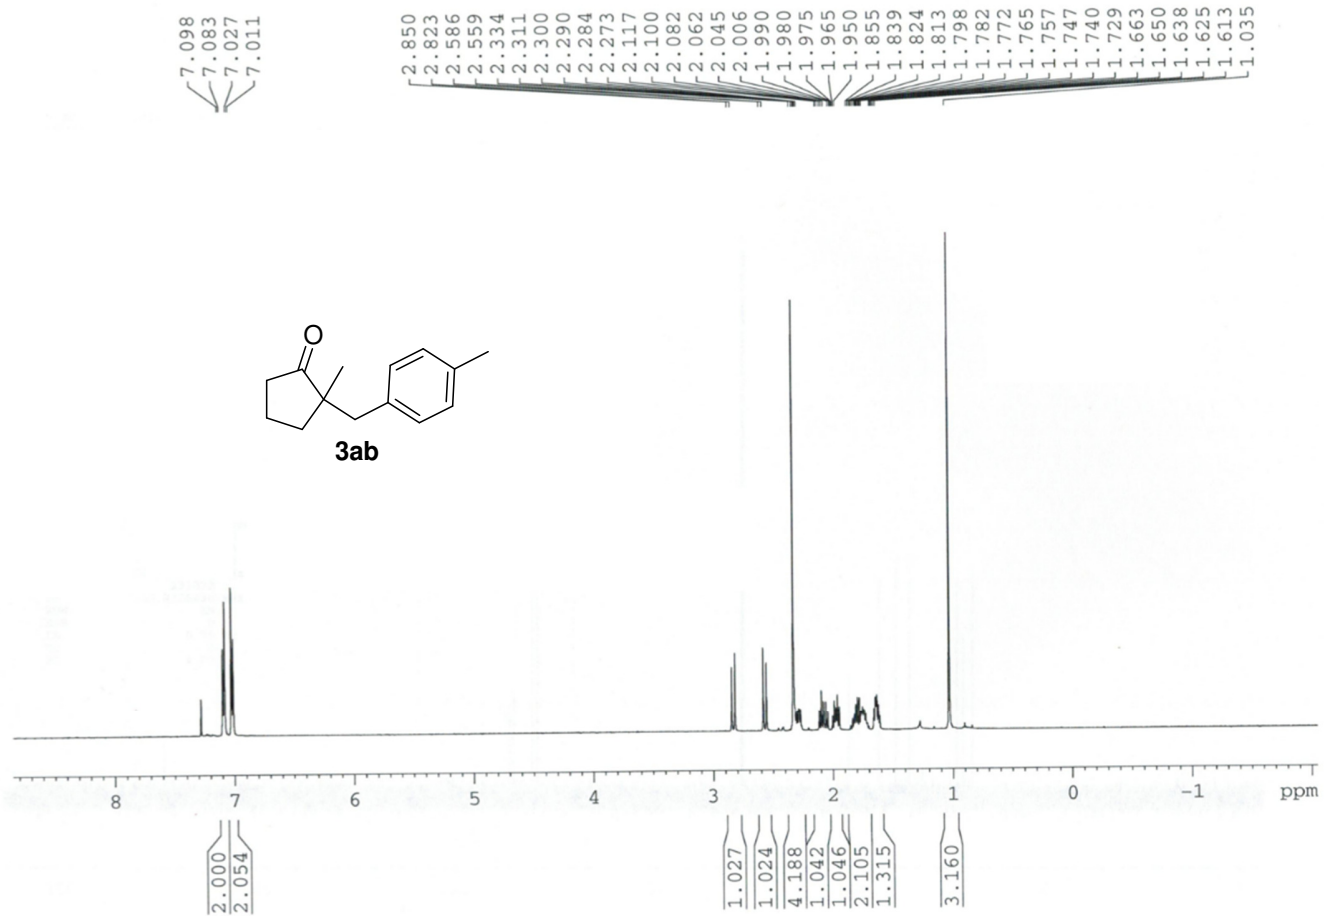

<sup>13</sup>C NMR spectra of compound **3ab**

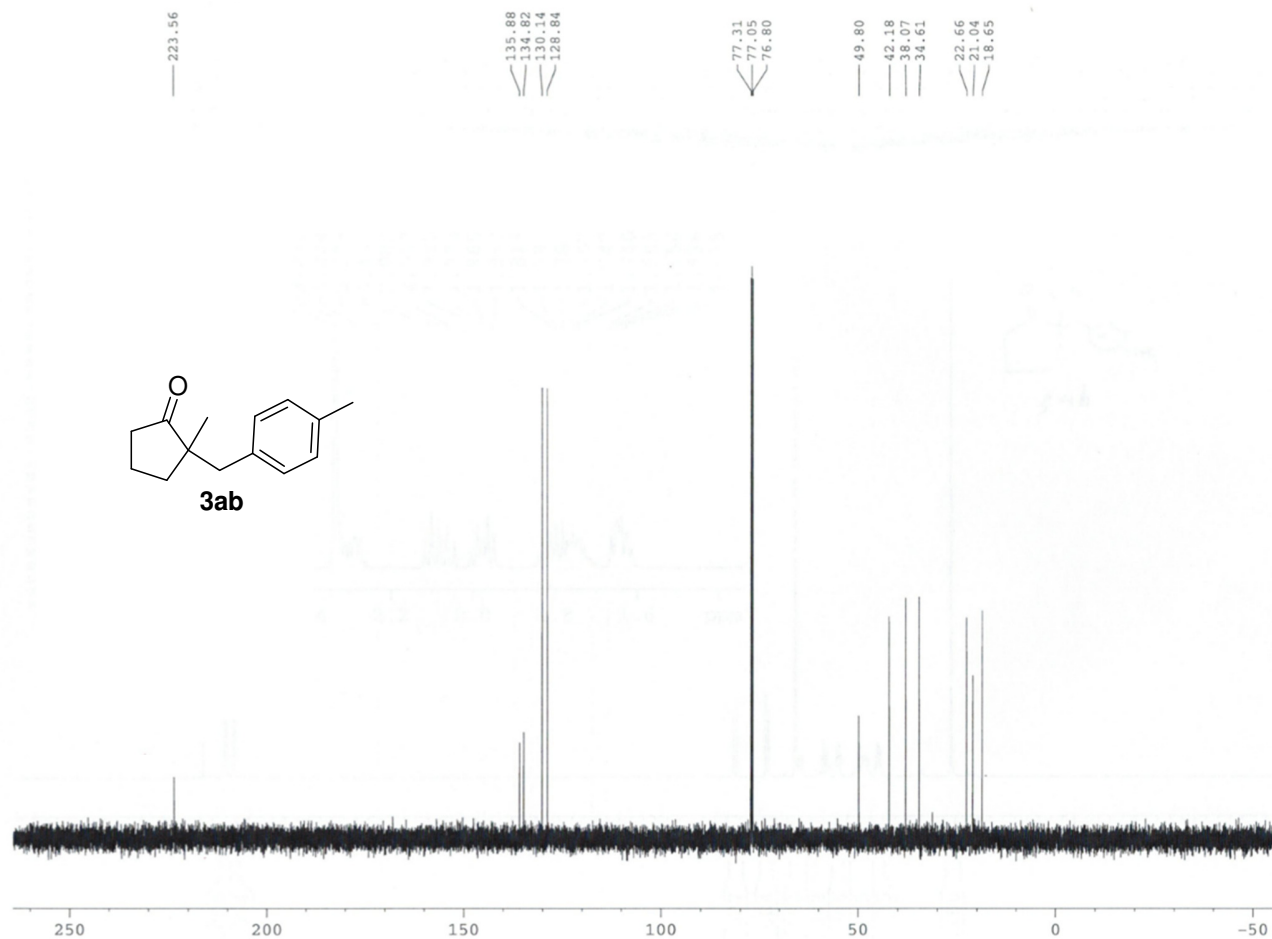

# <sup>1</sup>H NMR spectra of compound **3ac**

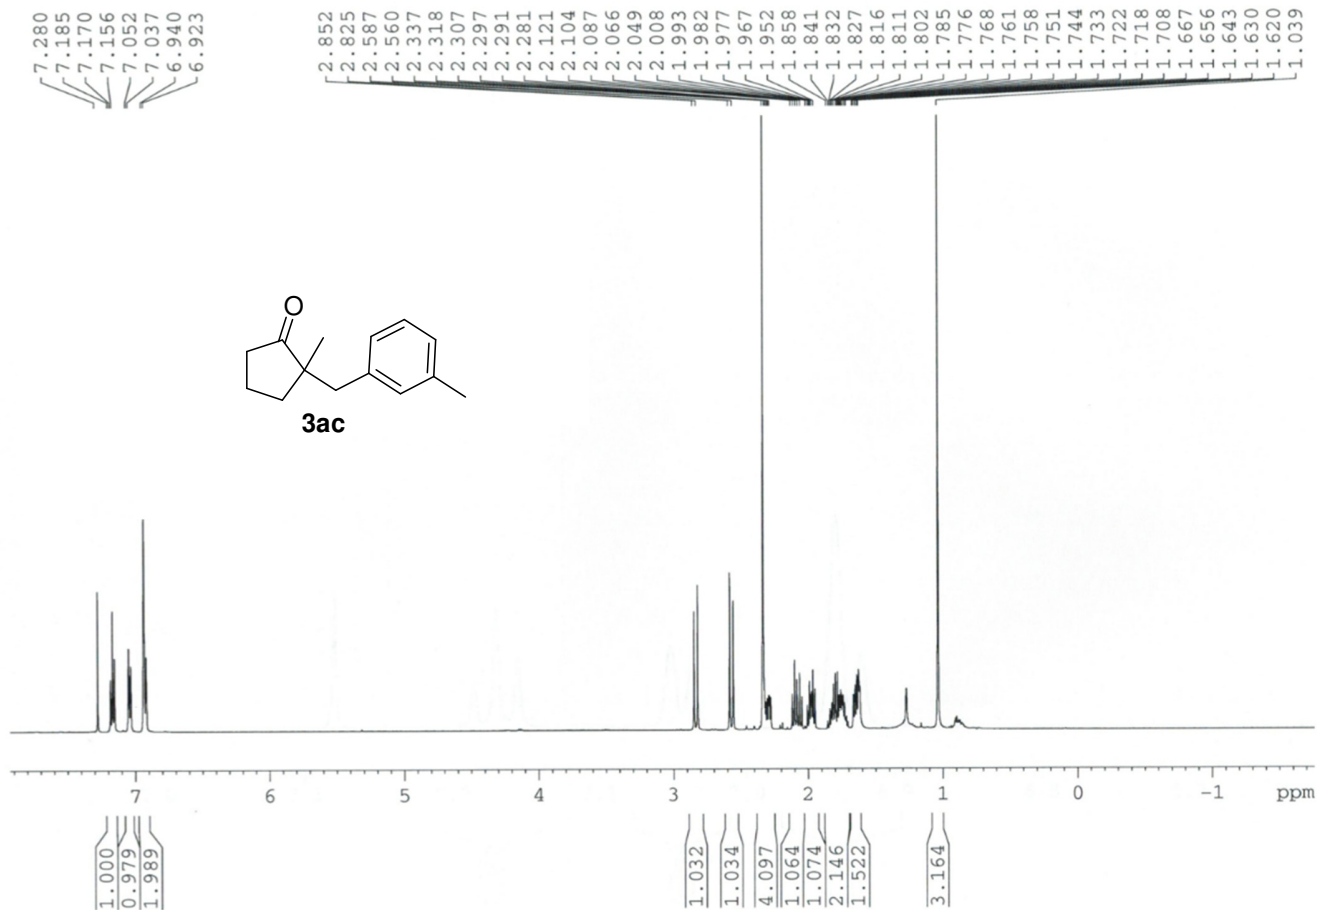

# $^{13}\text{C}$ NMR spectra of compound **3ac**

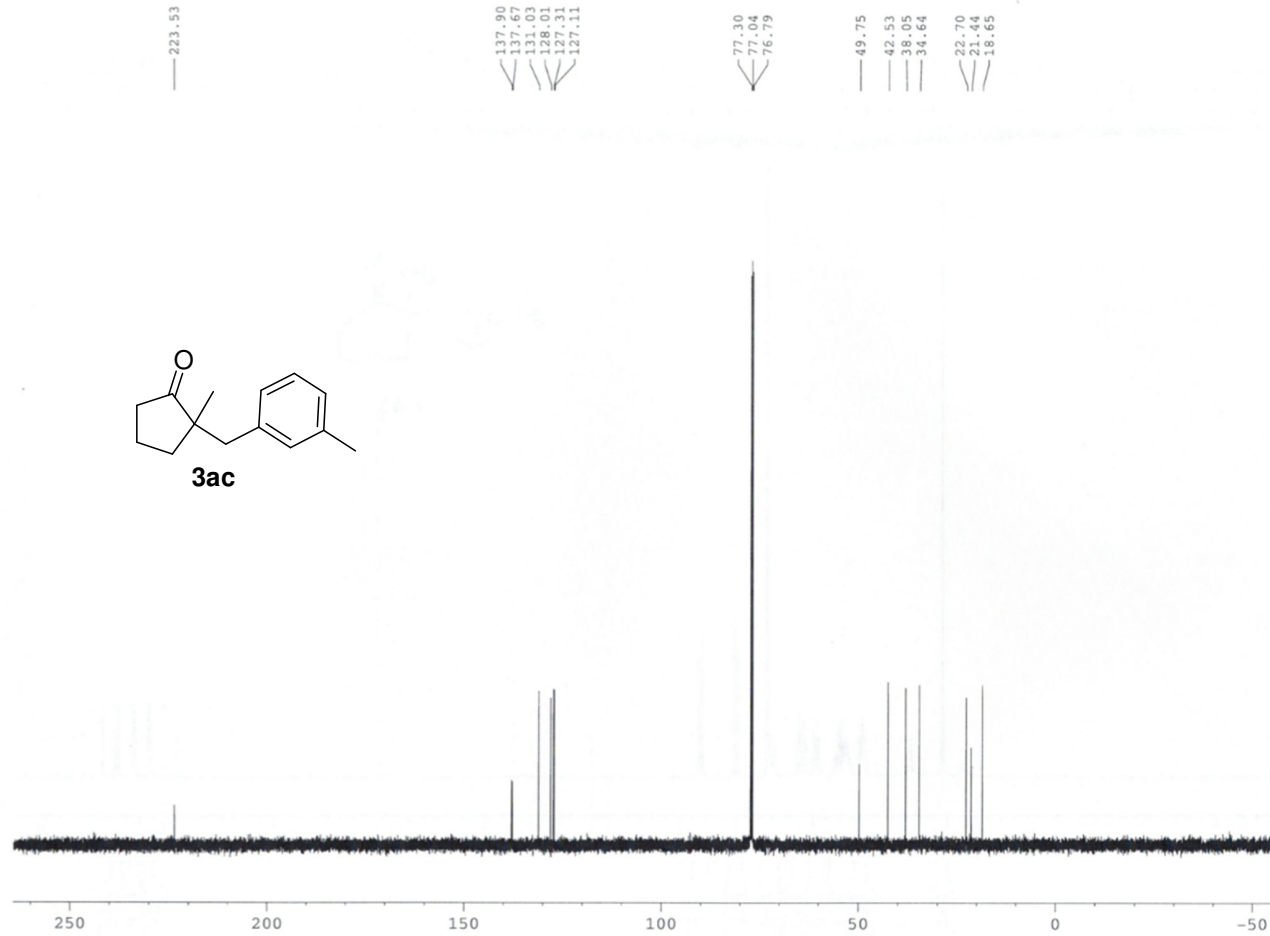

<sup>1</sup>H NMR spectra of compound **3ad**

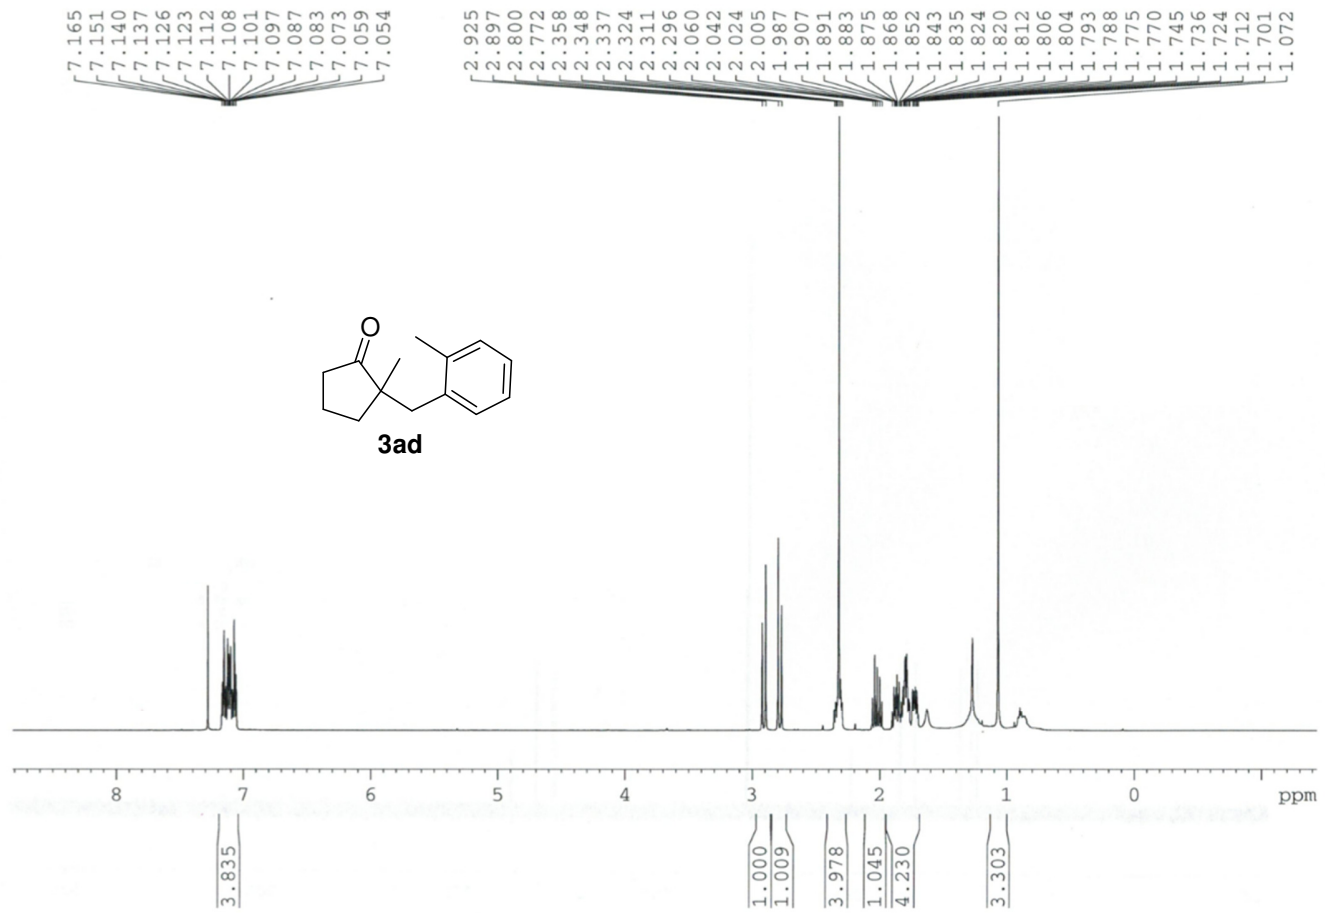

<sup>13</sup>C NMR spectra of compound **3ad**

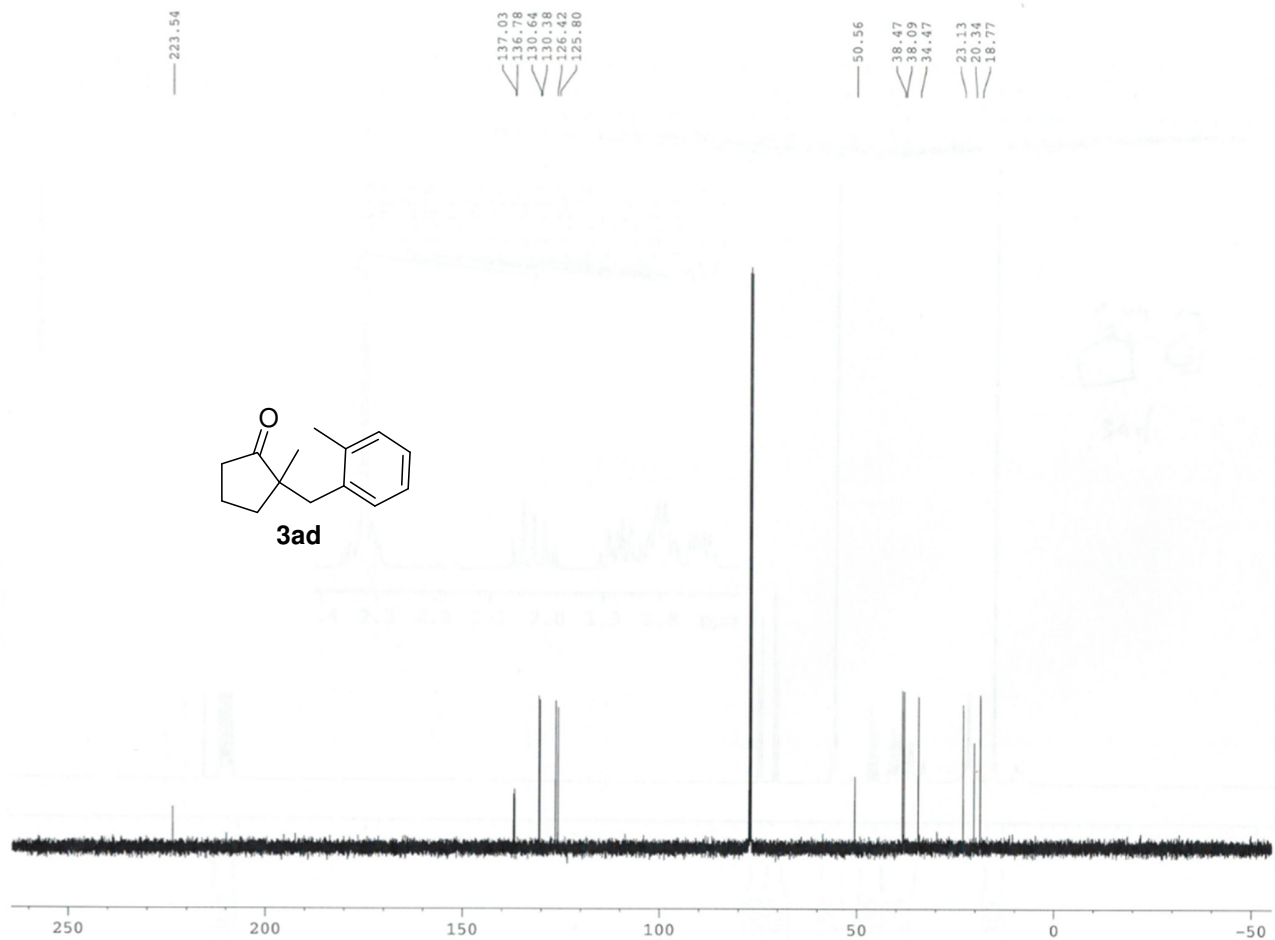



<sup>1</sup>H NMR spectra of compound **3ae**

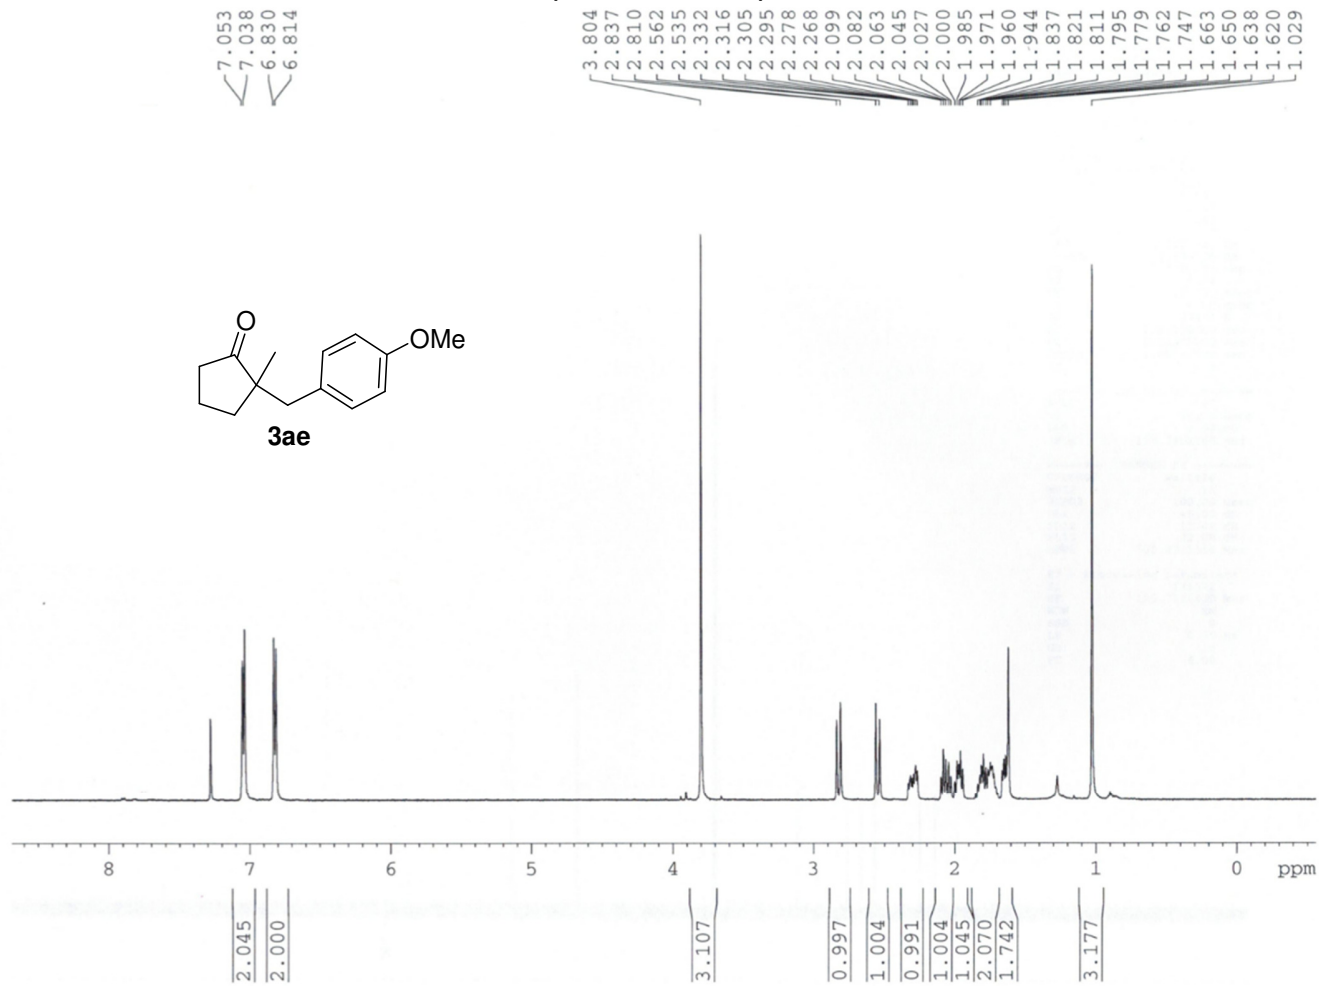

# <sup>13</sup>C NMR spectra of compound 3ae

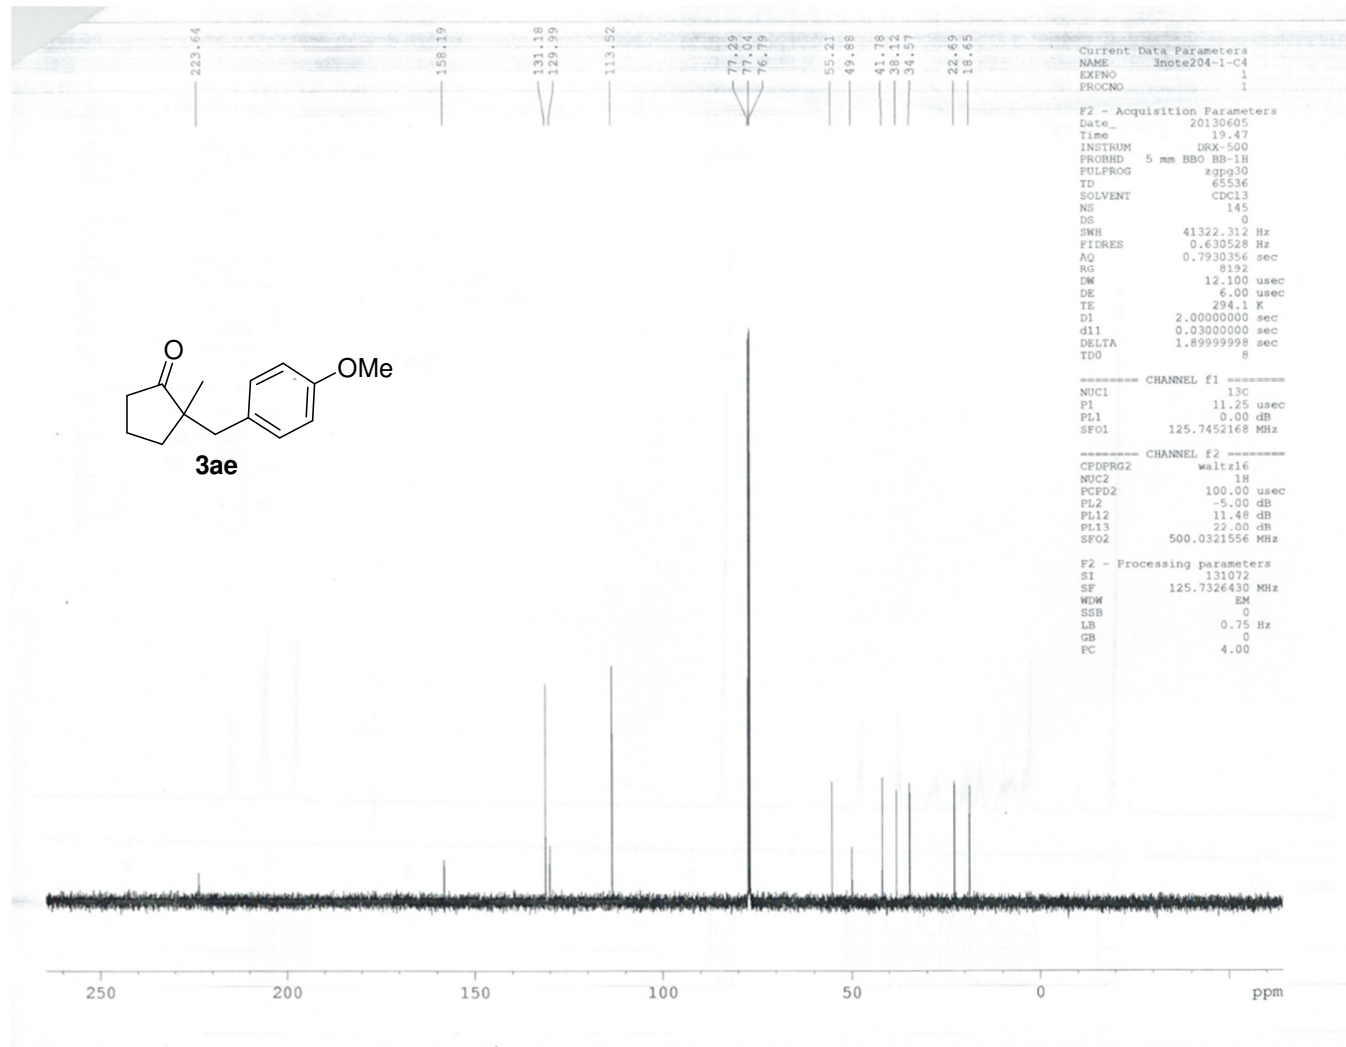

# <sup>1</sup>H NMR spectra of compound **3af**

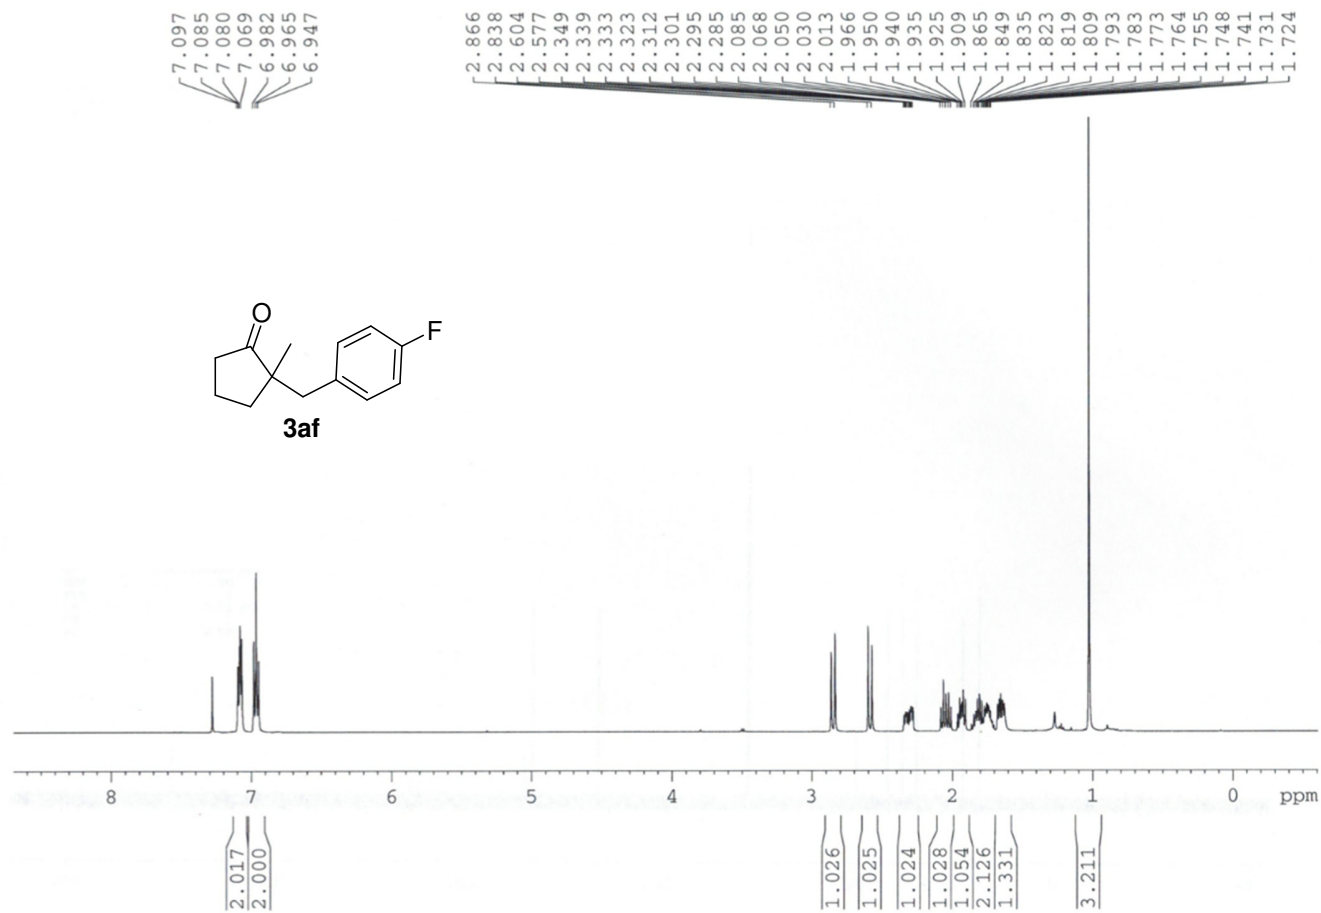

# <sup>13</sup>C NMR spectra of compound **3af**

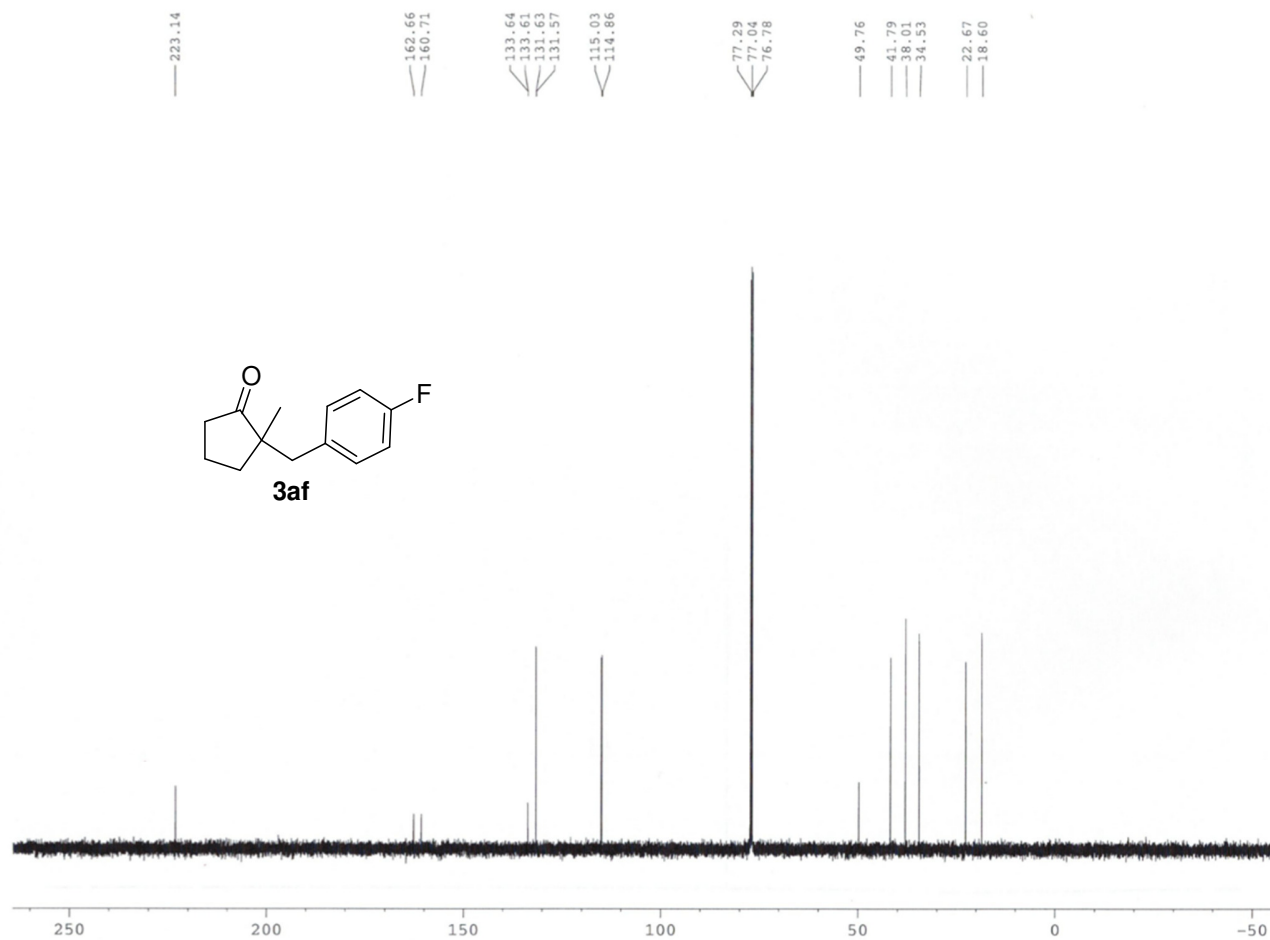

$^{19}\text{F}$  NMR spectra of compound **3af**

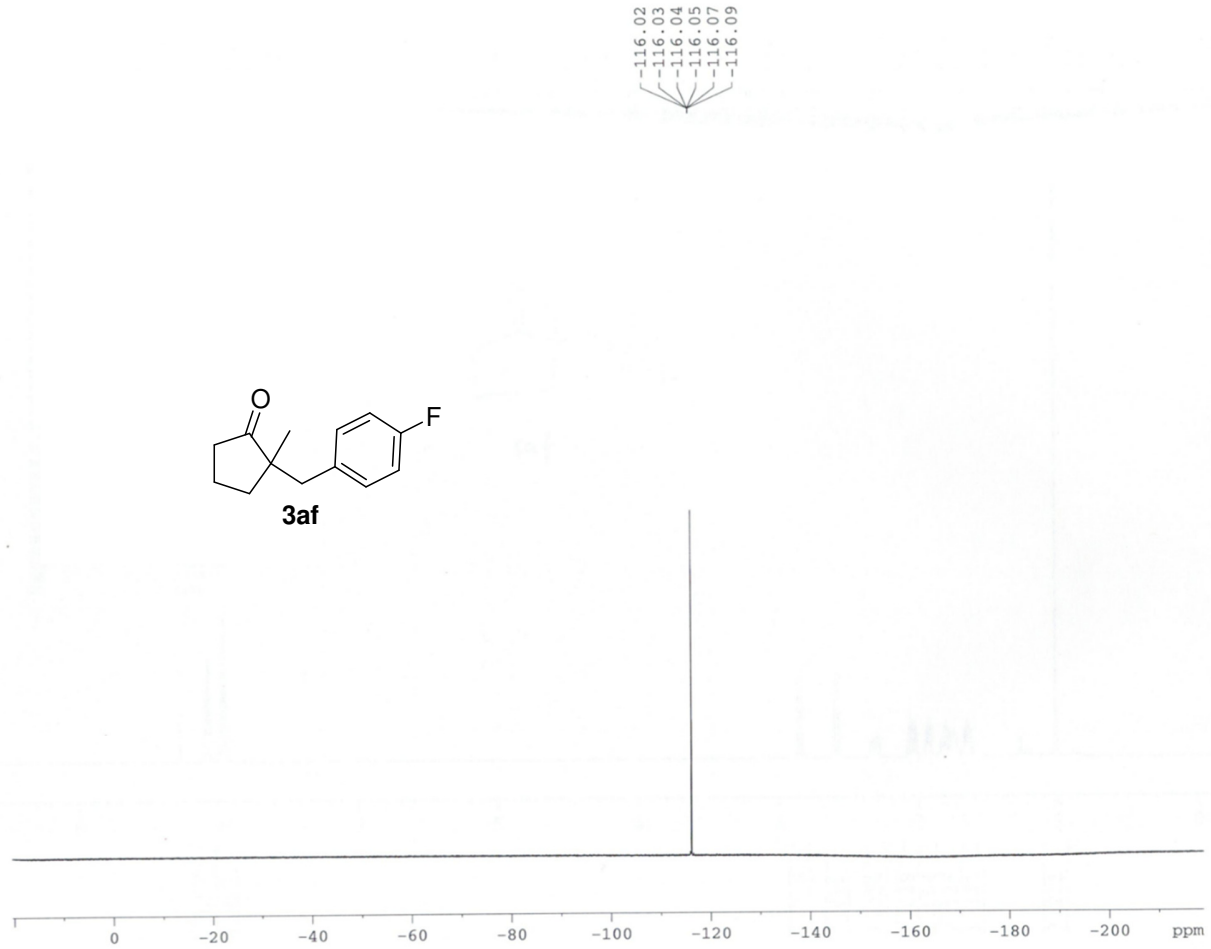

# <sup>1</sup>H NMR spectra of compound **3ag**

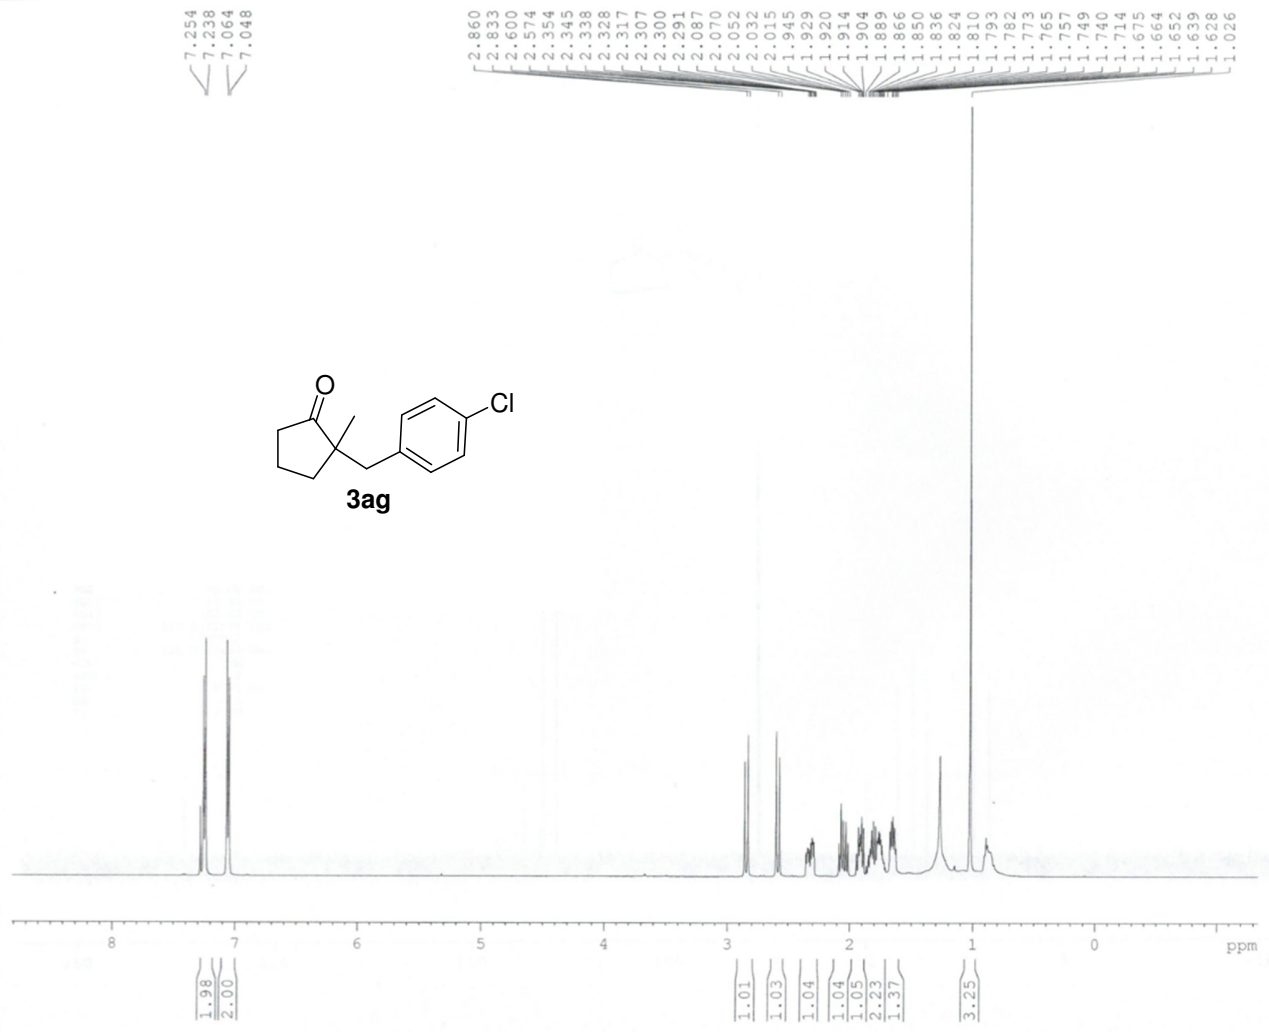

# <sup>13</sup>C NMR spectra of compound **3ag**

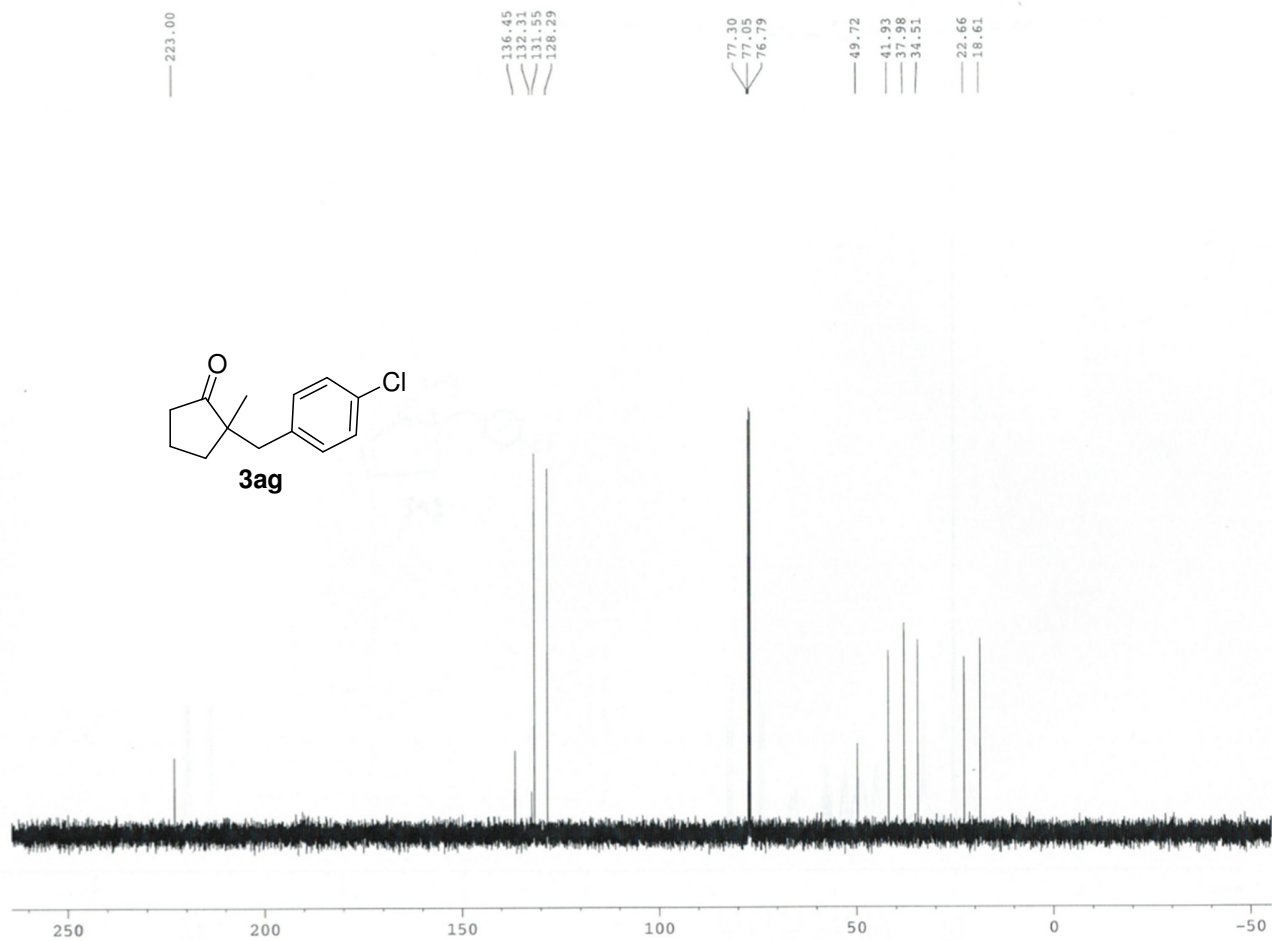

# <sup>1</sup>H NMR spectra of compound 3ah

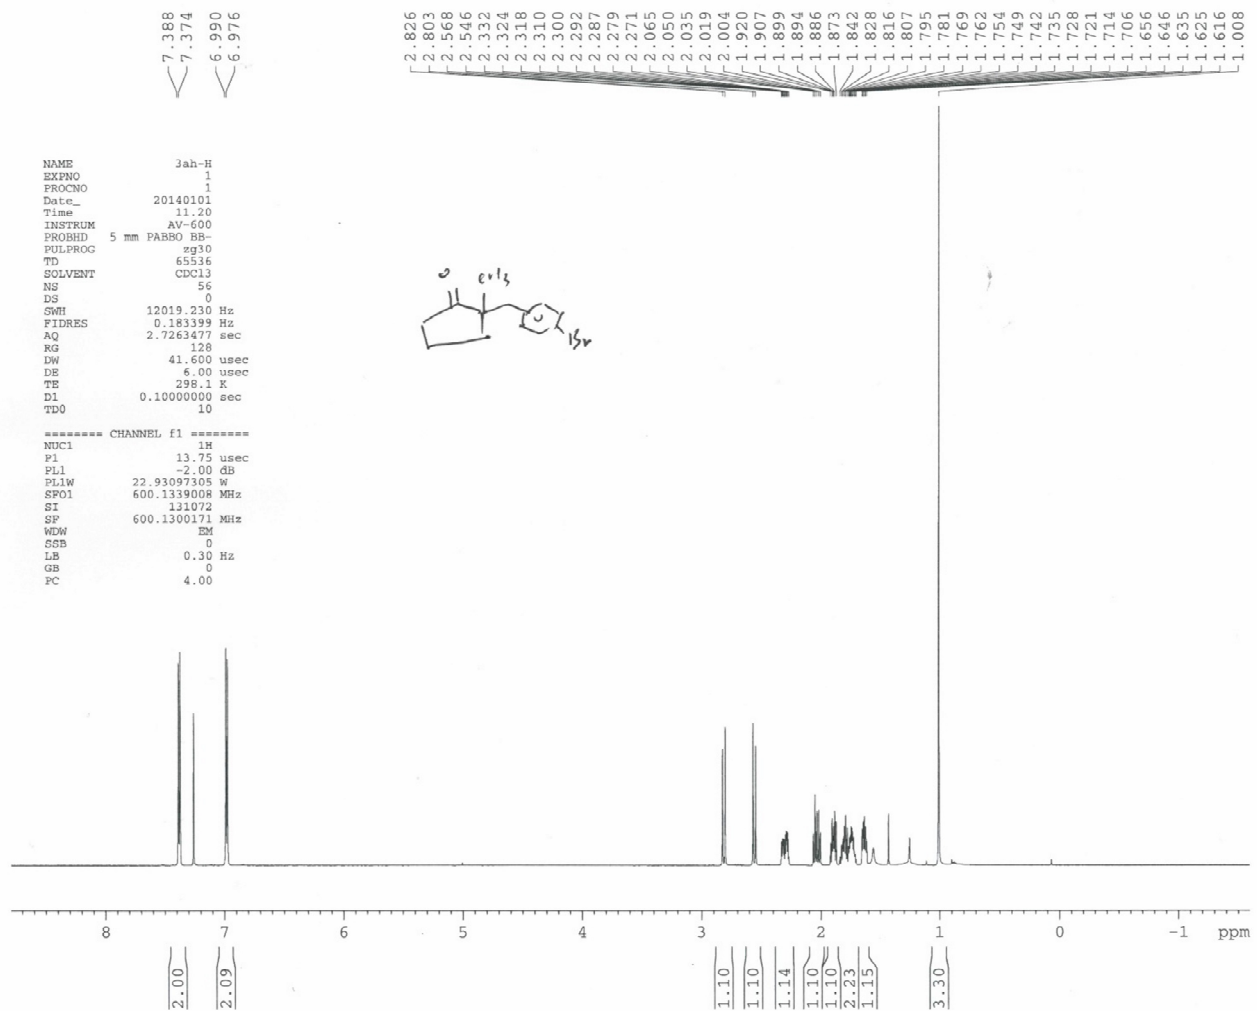



$^{13}\text{C}$  NMR spectra of compound **3ah**

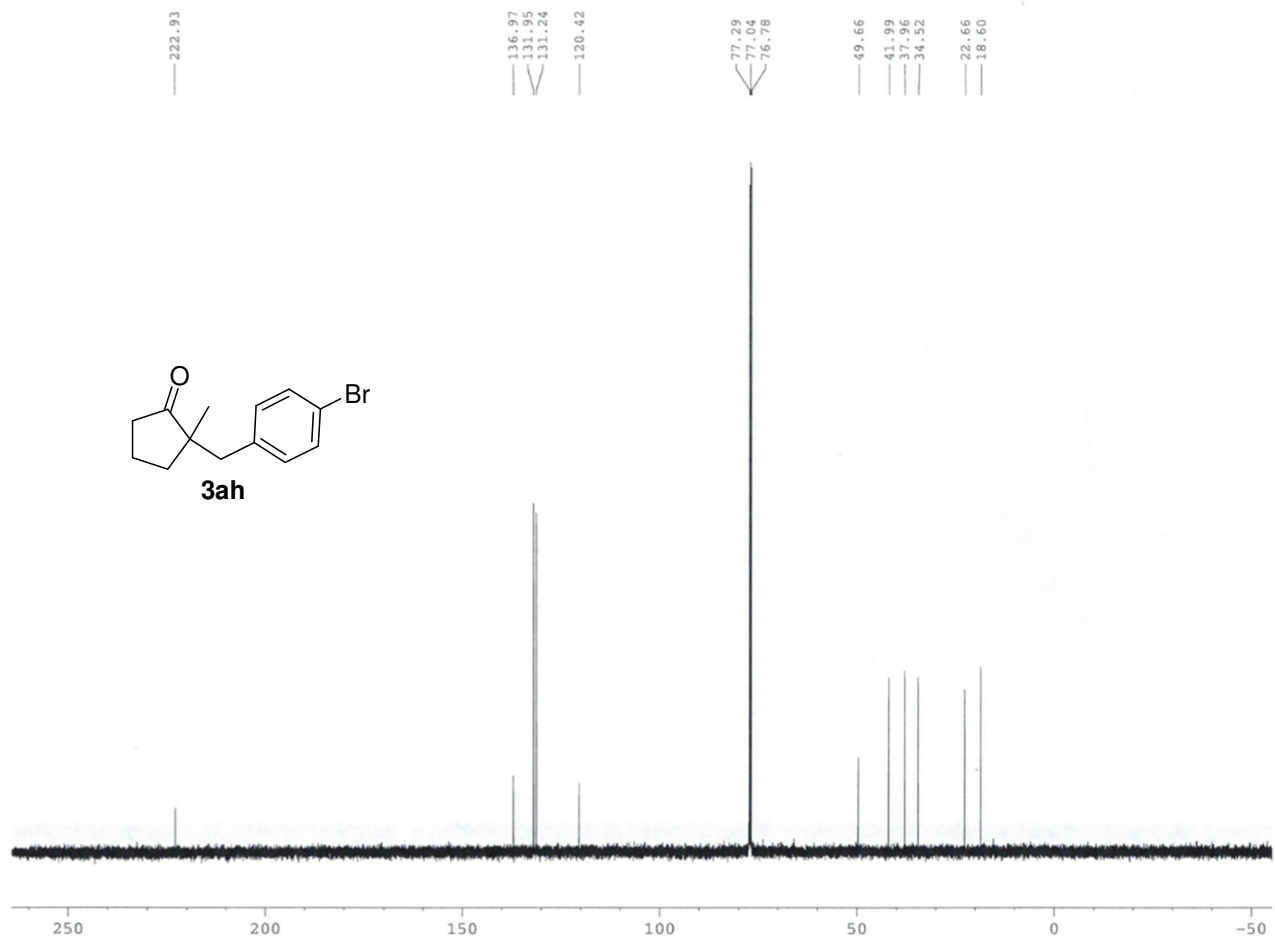

# <sup>1</sup>H NMR spectra of compound 3ai

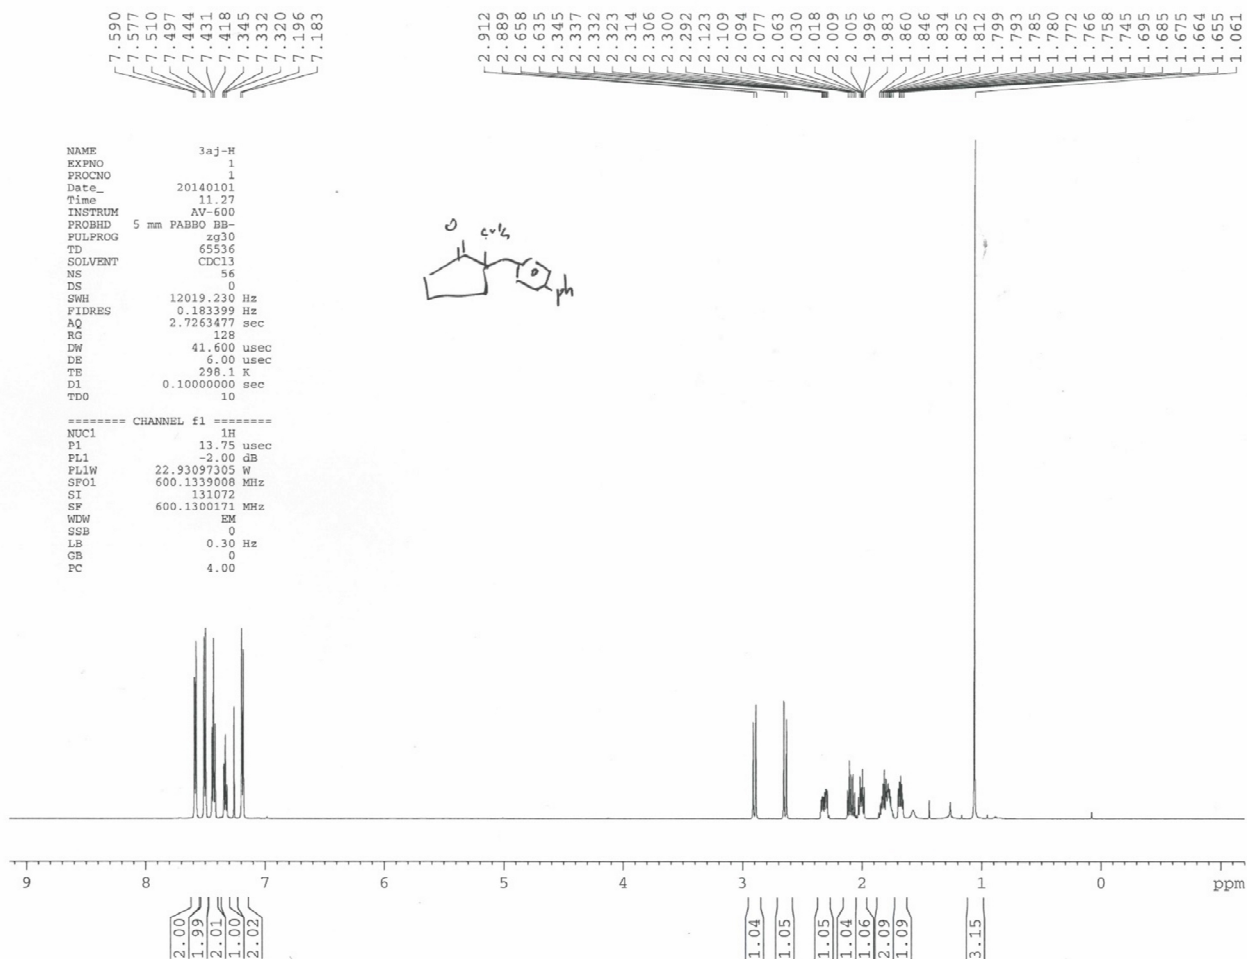

<sup>13</sup>C NMR spectra of compound **3ai**

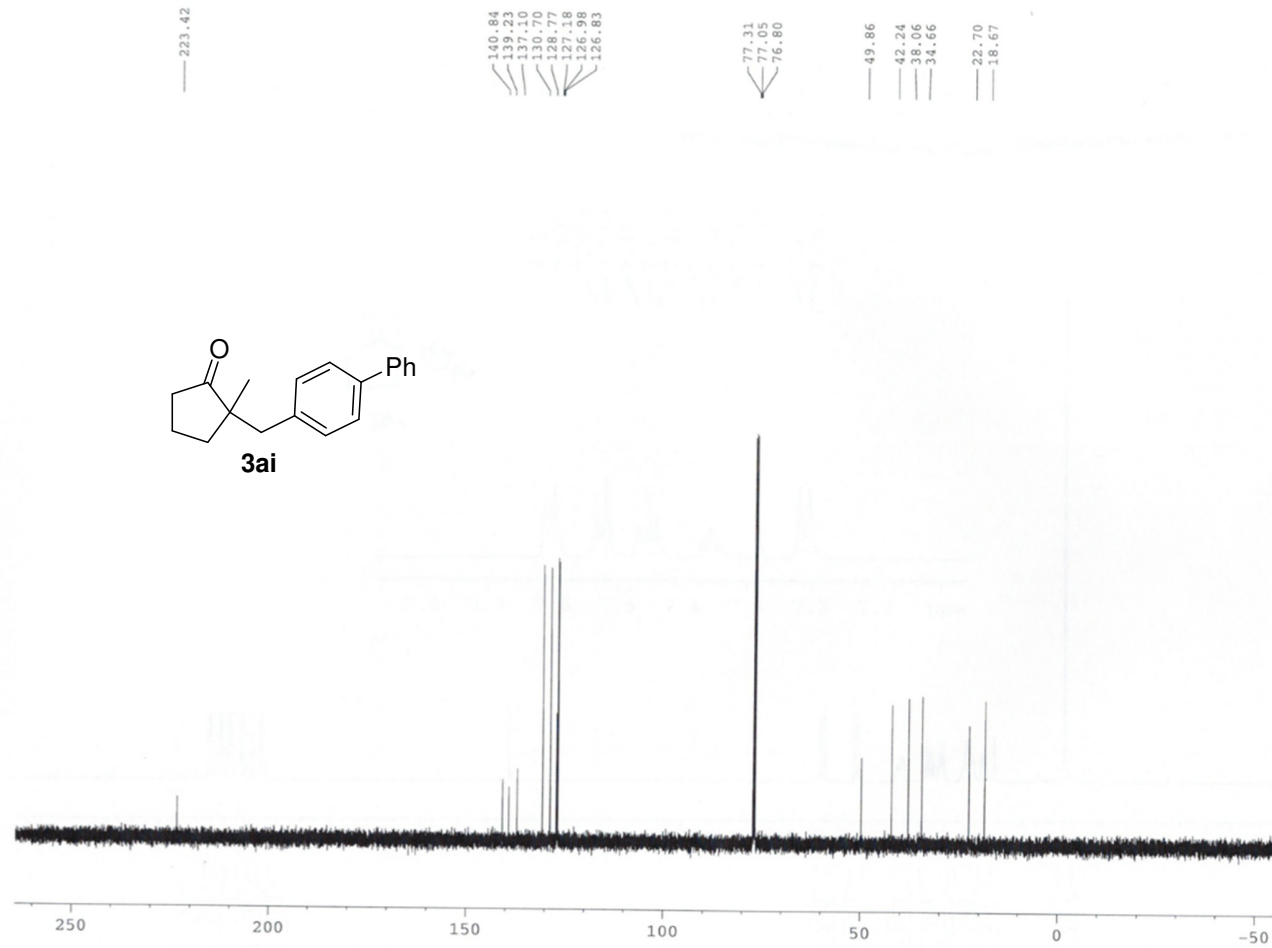

<sup>1</sup>H NMR spectra of compound **3aj**

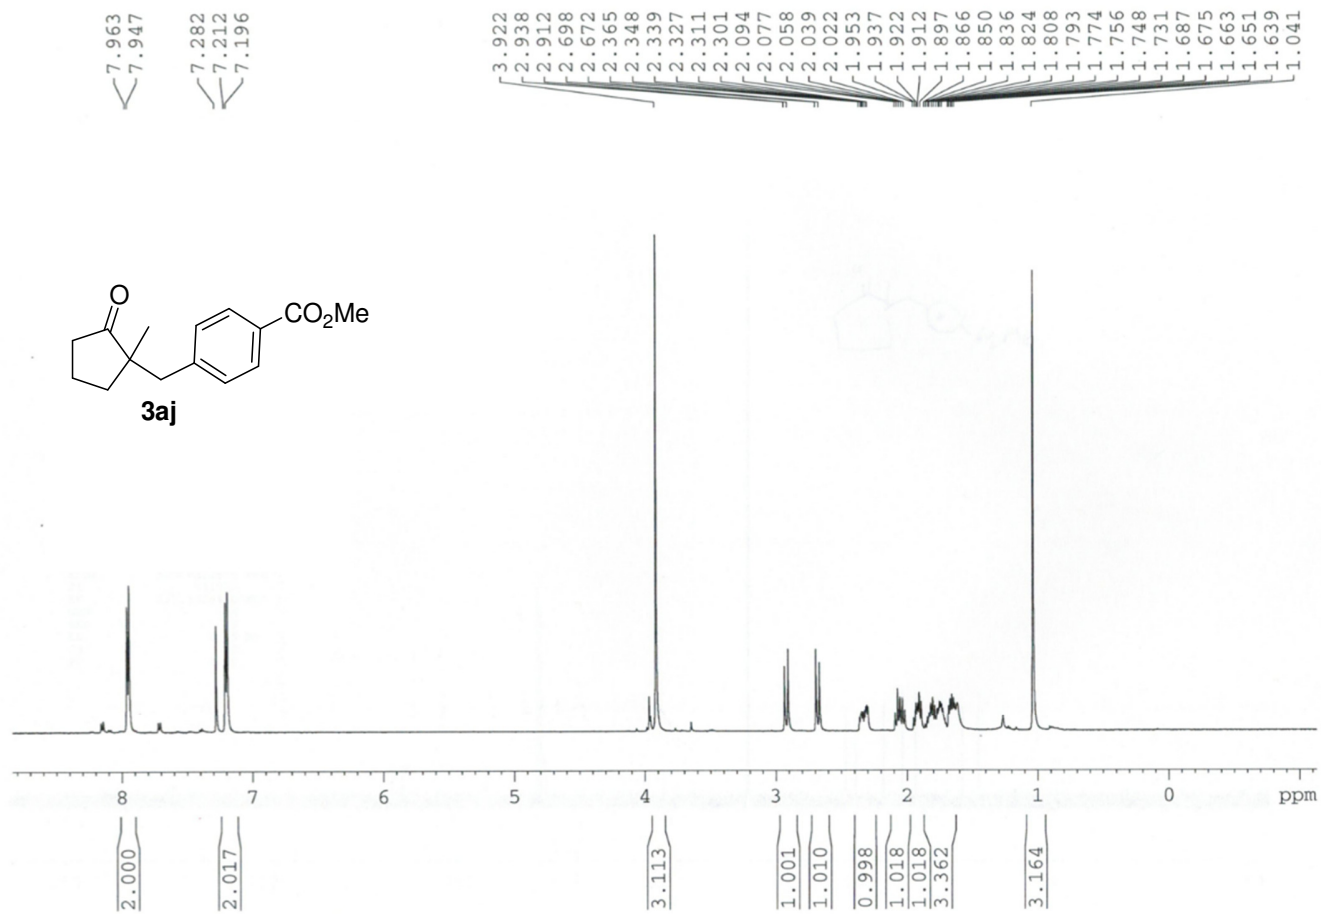

<sup>13</sup>C NMR spectra of compound **3aj**

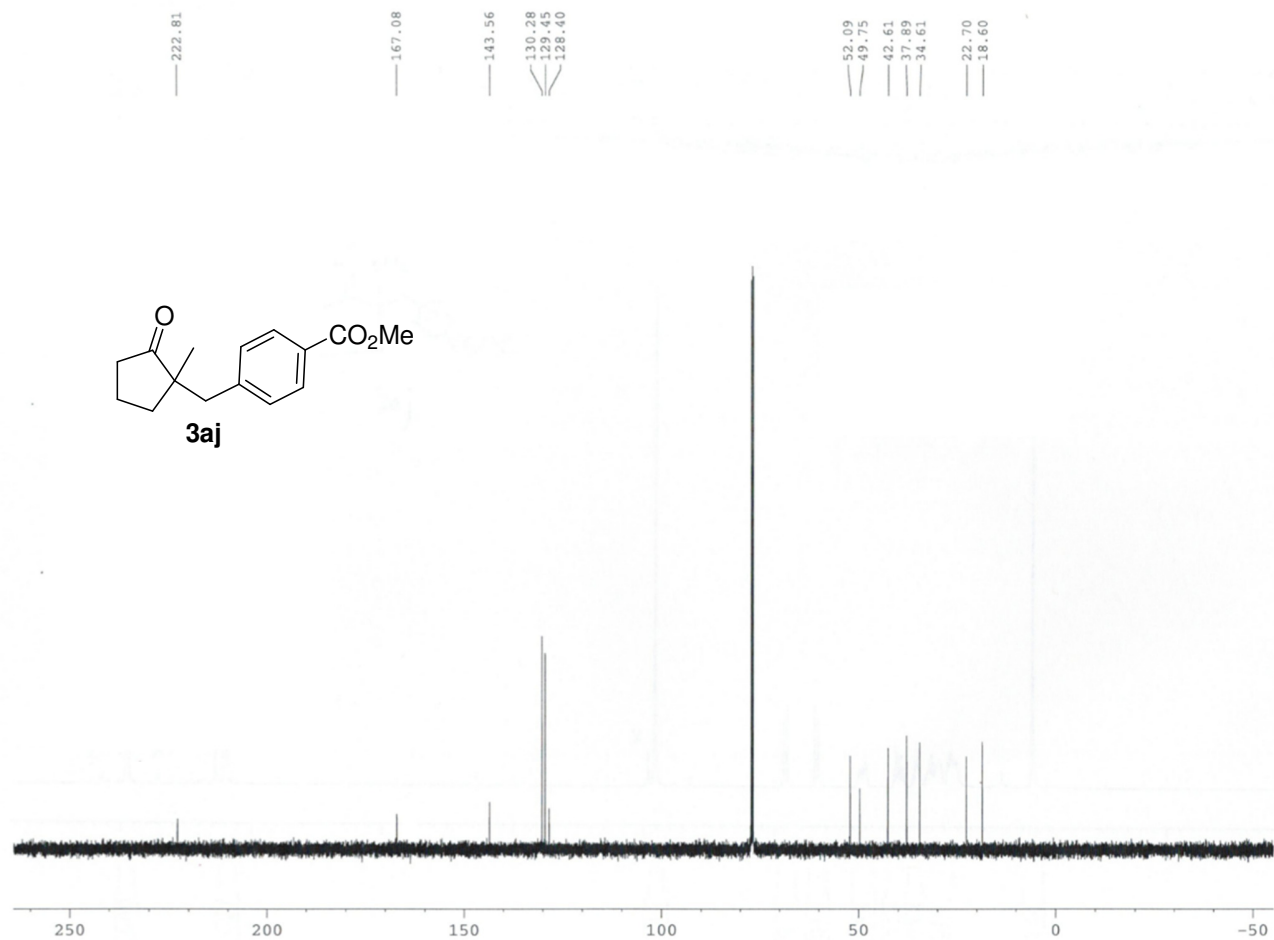

<sup>1</sup>H NMR spectra of compound **3ba**

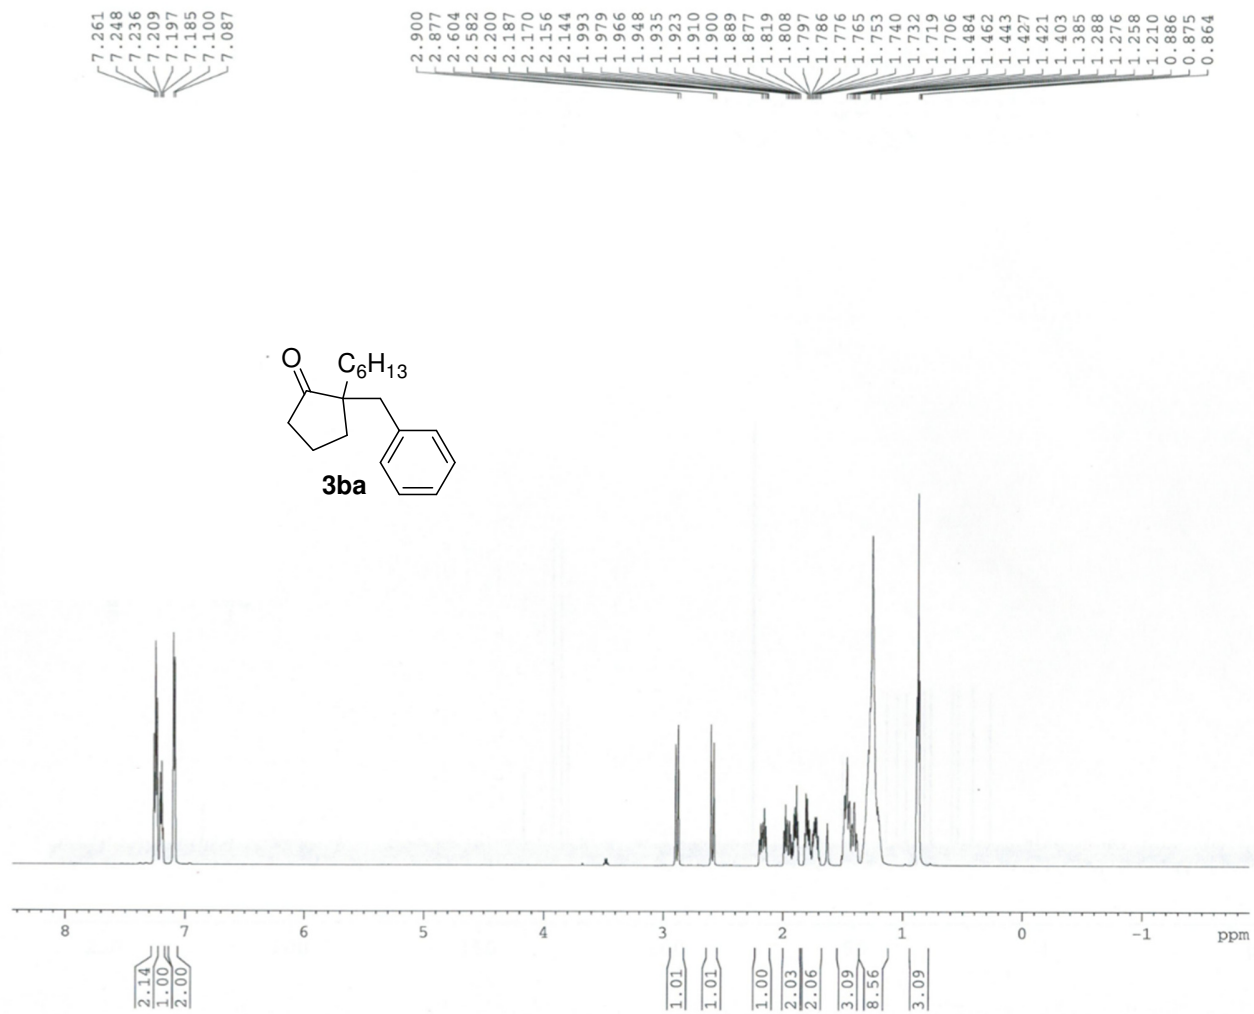

<sup>13</sup>C NMR spectra of compound **3ba**

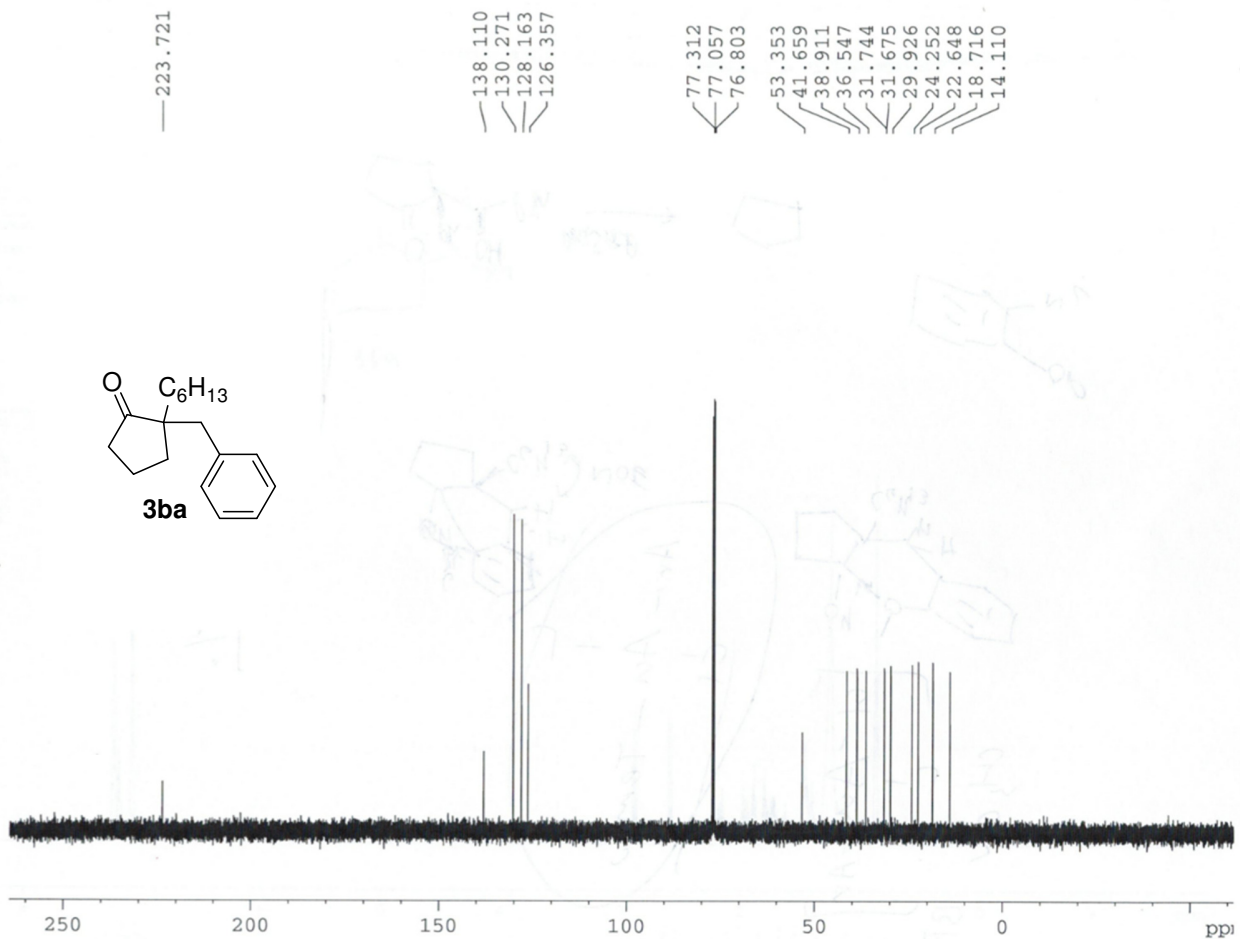

<sup>1</sup>H NMR spectra of compound **3ca**

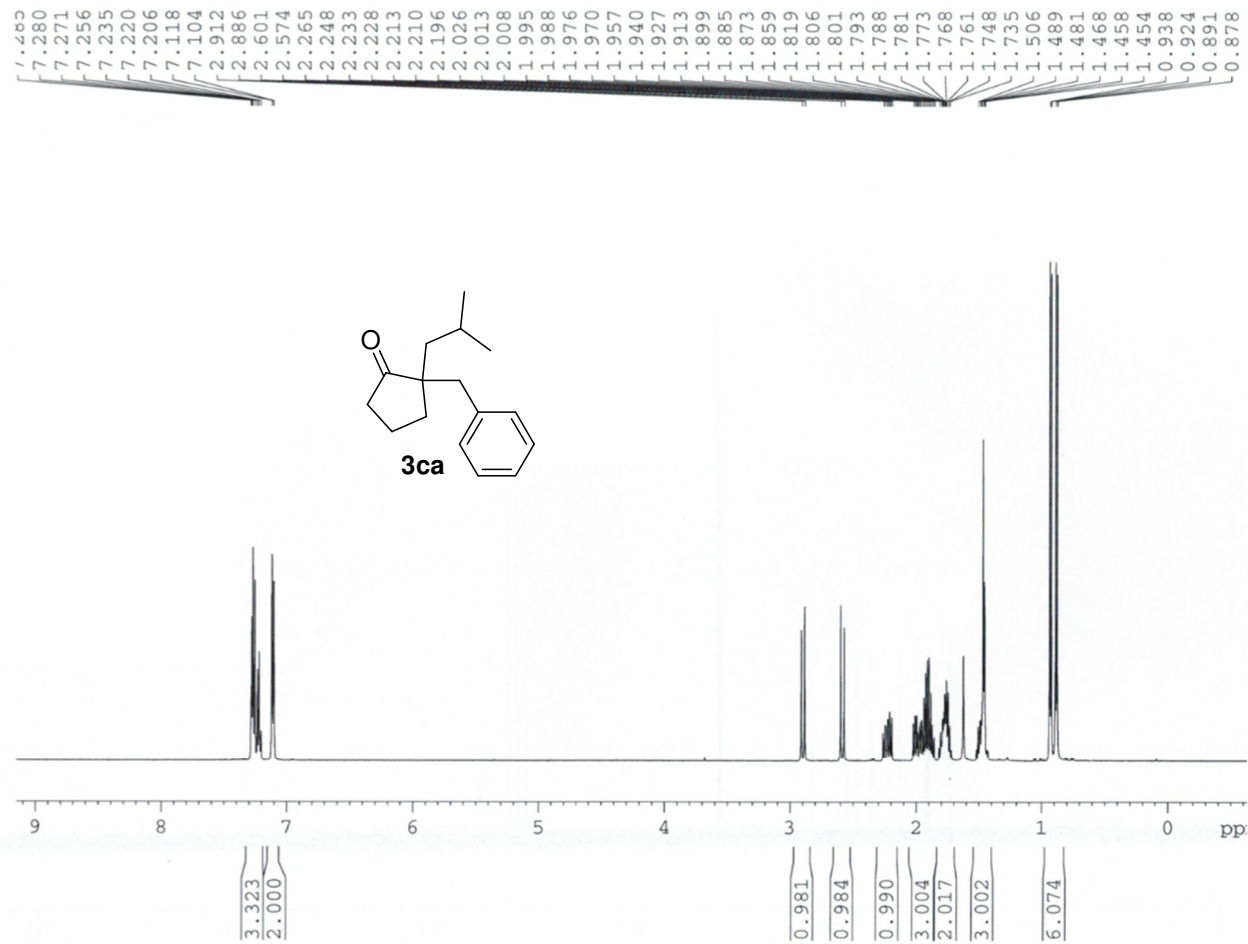



# $^{13}\text{C}$ NMR spectra of compound **3ca**

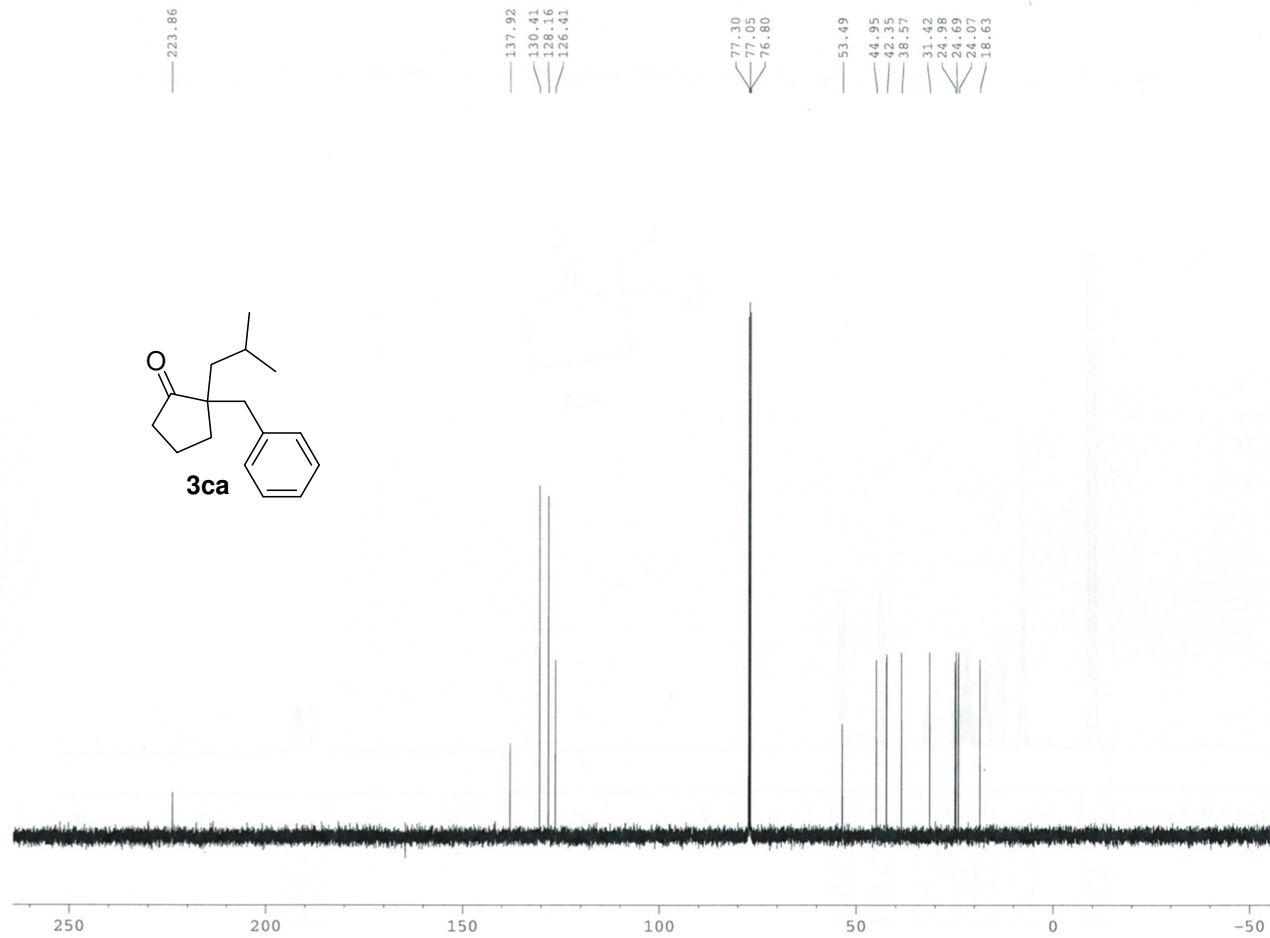

<sup>1</sup>H NMR spectra of compound **3da**

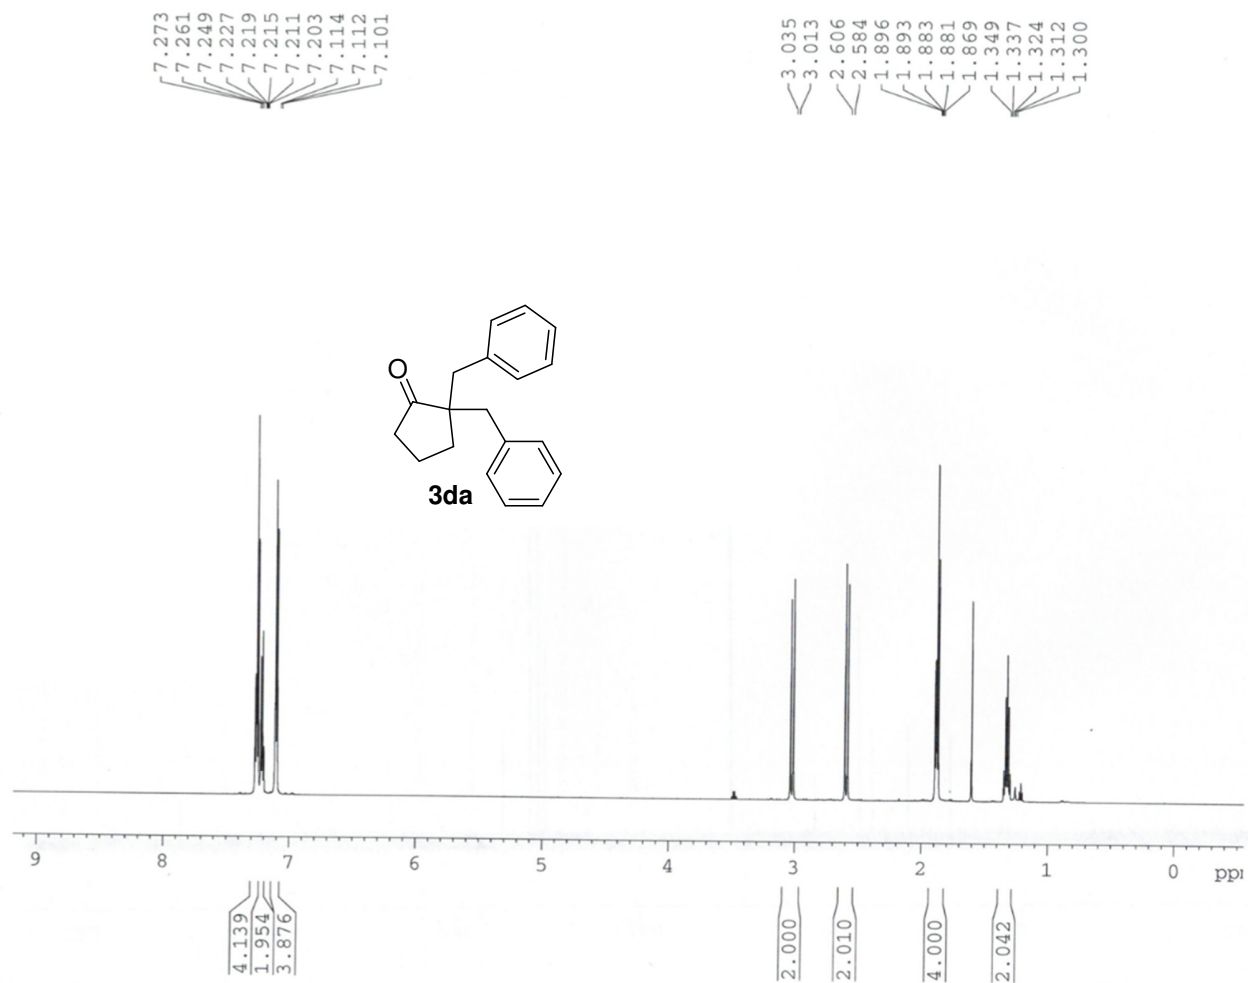

<sup>13</sup>C NMR spectra of compound **3da**

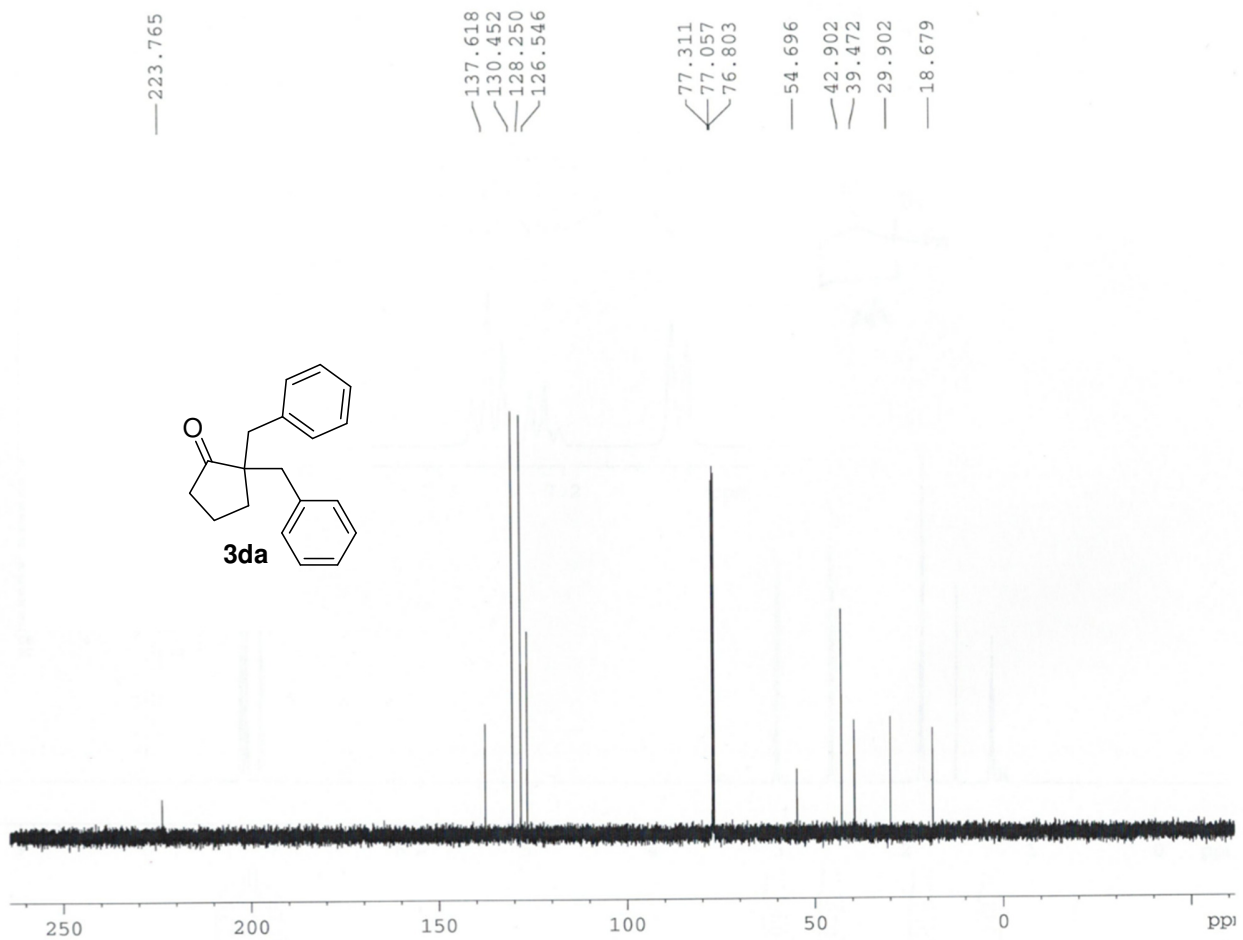

# <sup>1</sup>H NMR spectra of compound **3ea**

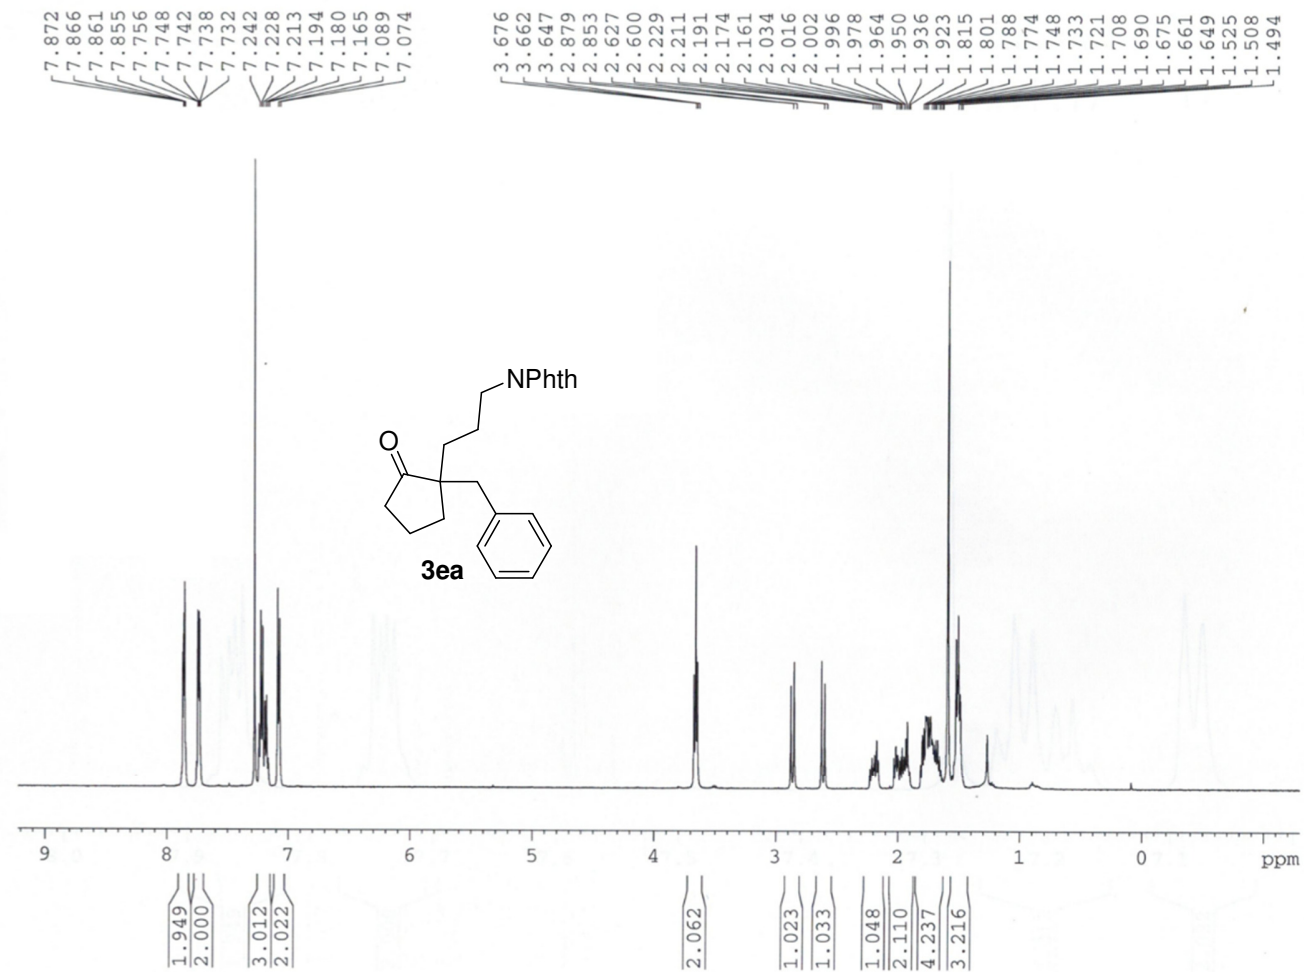

<sup>13</sup>C NMR spectra of compound **3ea**

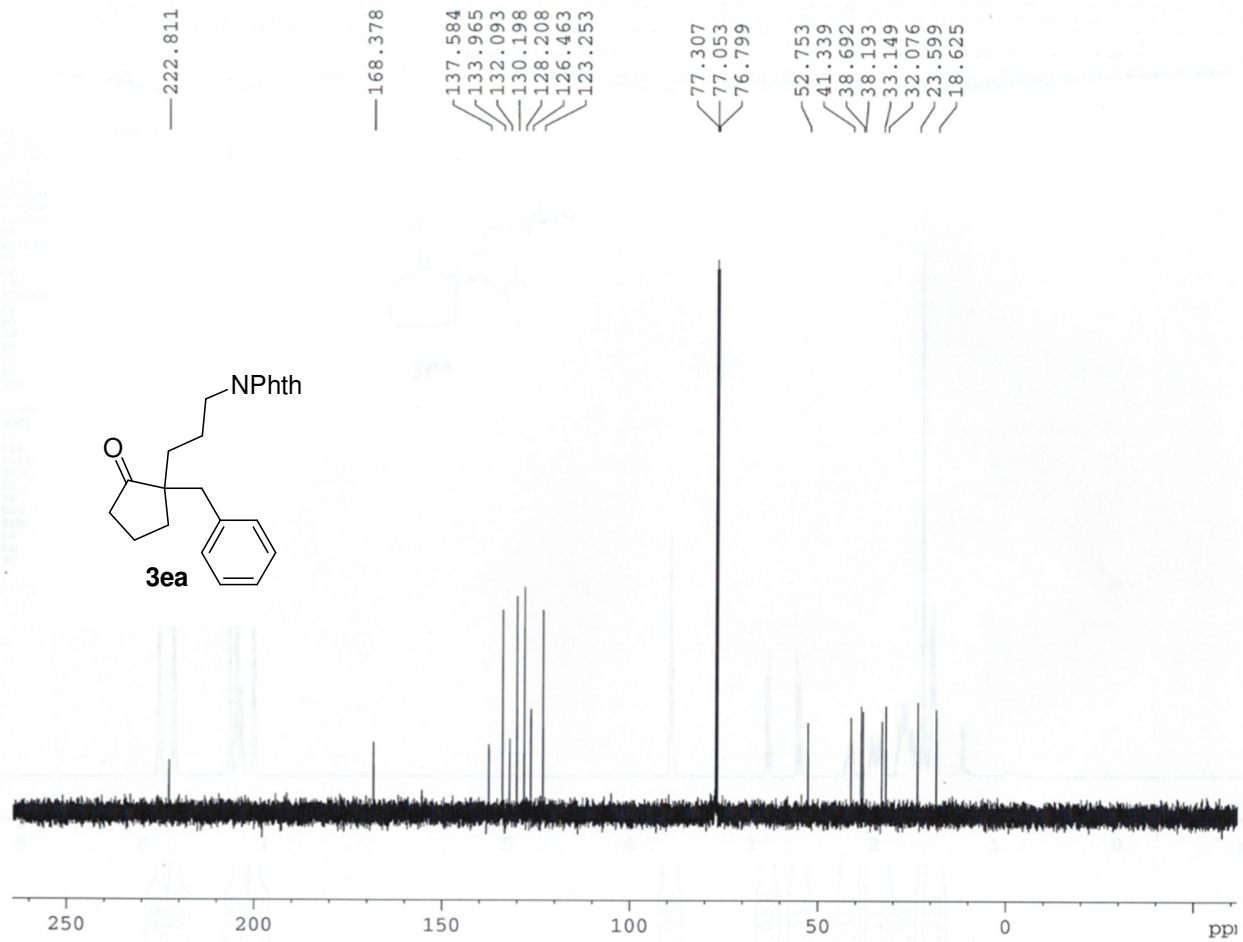

<sup>1</sup>H NMR spectra of compound **3fb**

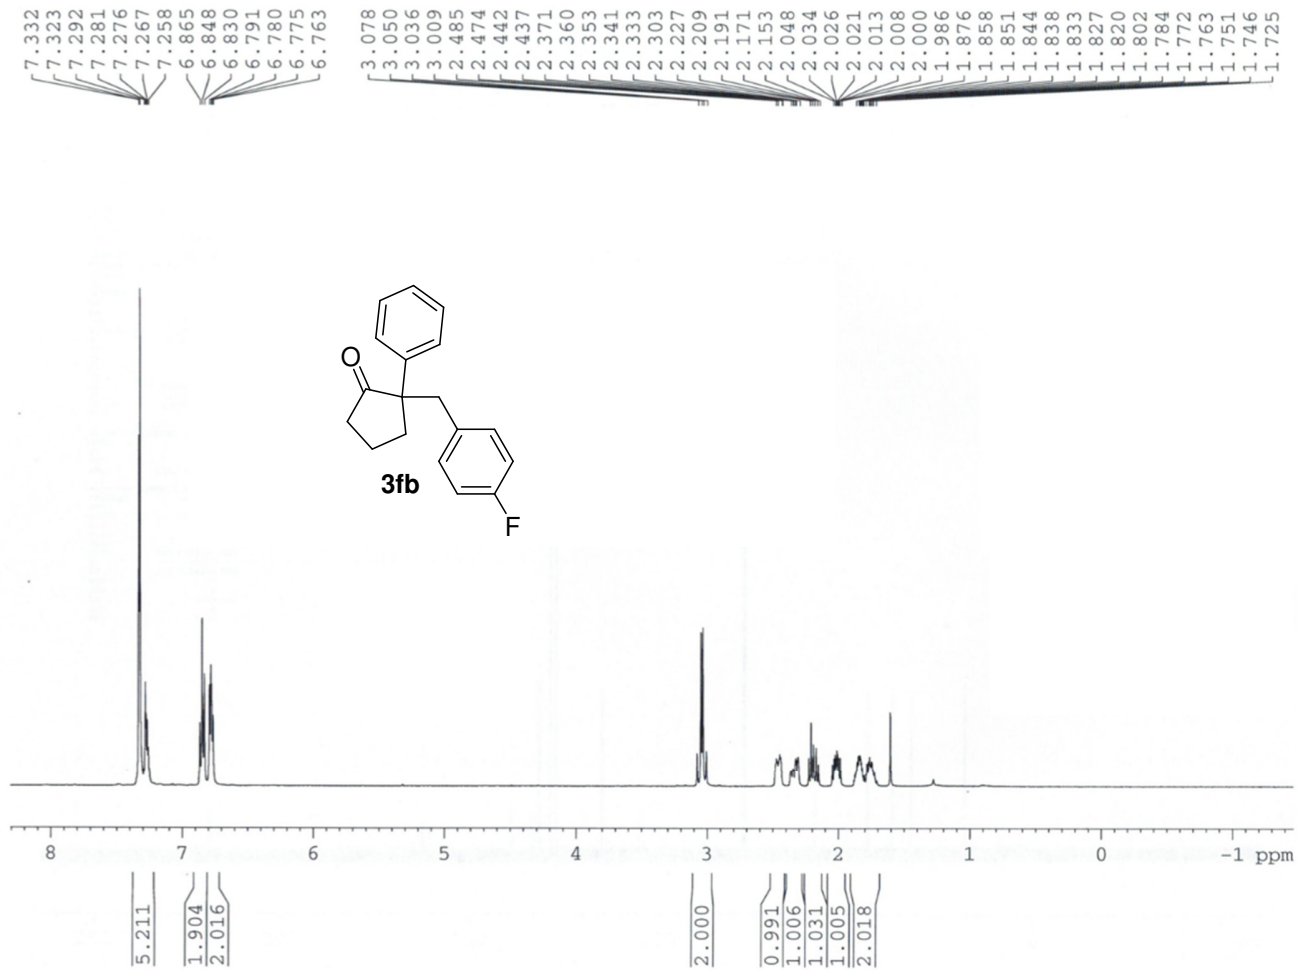

<sup>13</sup>C NMR spectra of compound **3fb**

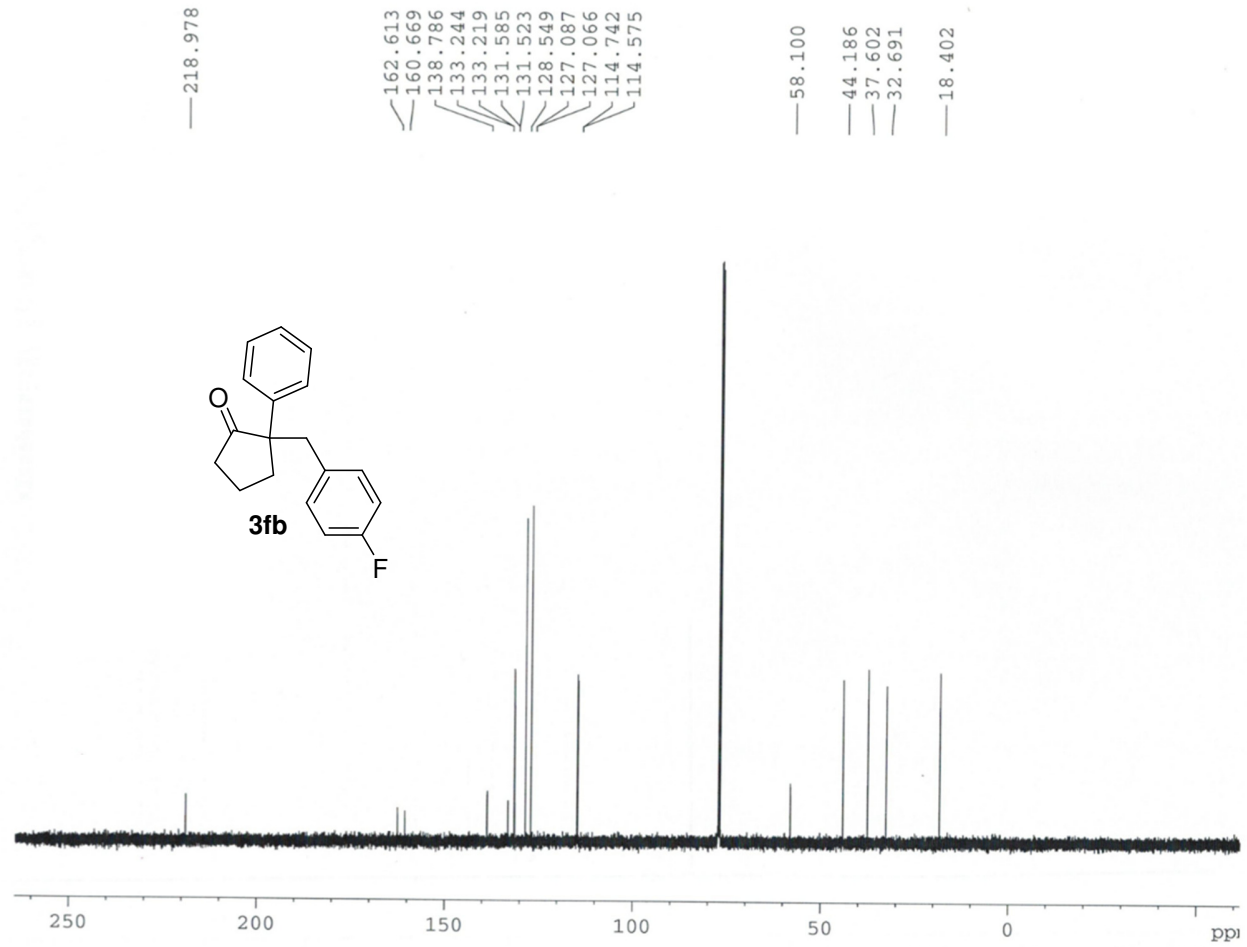

$^{19}\text{F}$  NMR spectra of compound **3fb**

-115.98  
-116.00  
-116.01  
-116.03  
-116.04  
-116.05

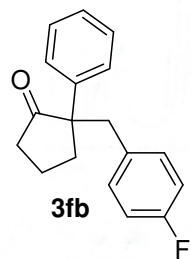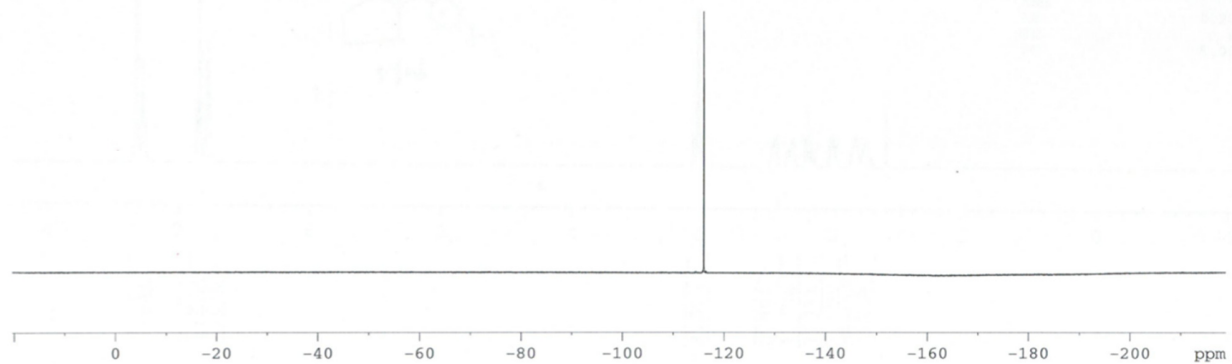



# <sup>1</sup>H NMR spectra of compound 3ga

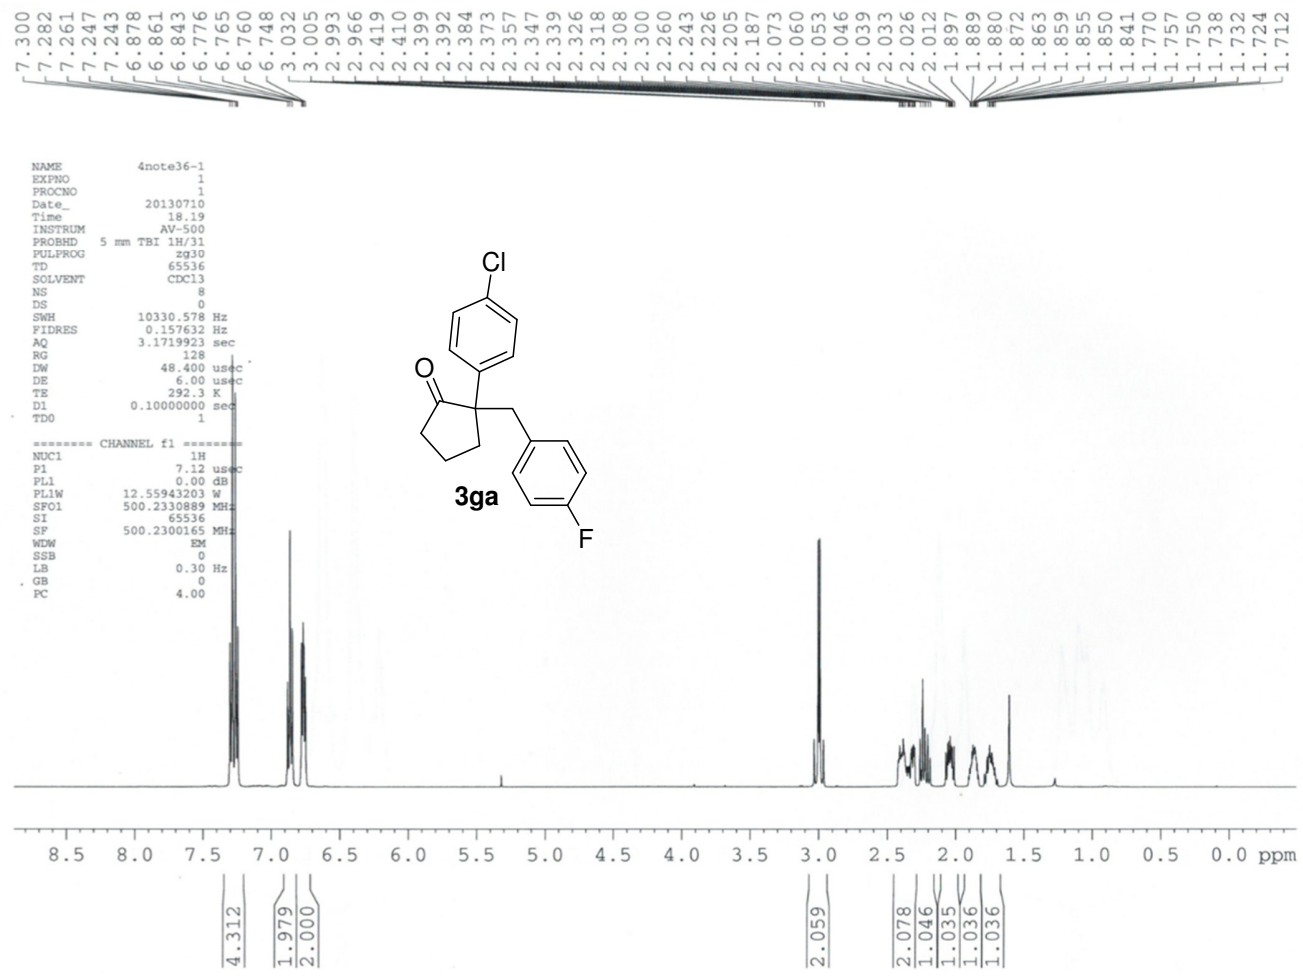

<sup>13</sup>C NMR spectra of compound **3ga**

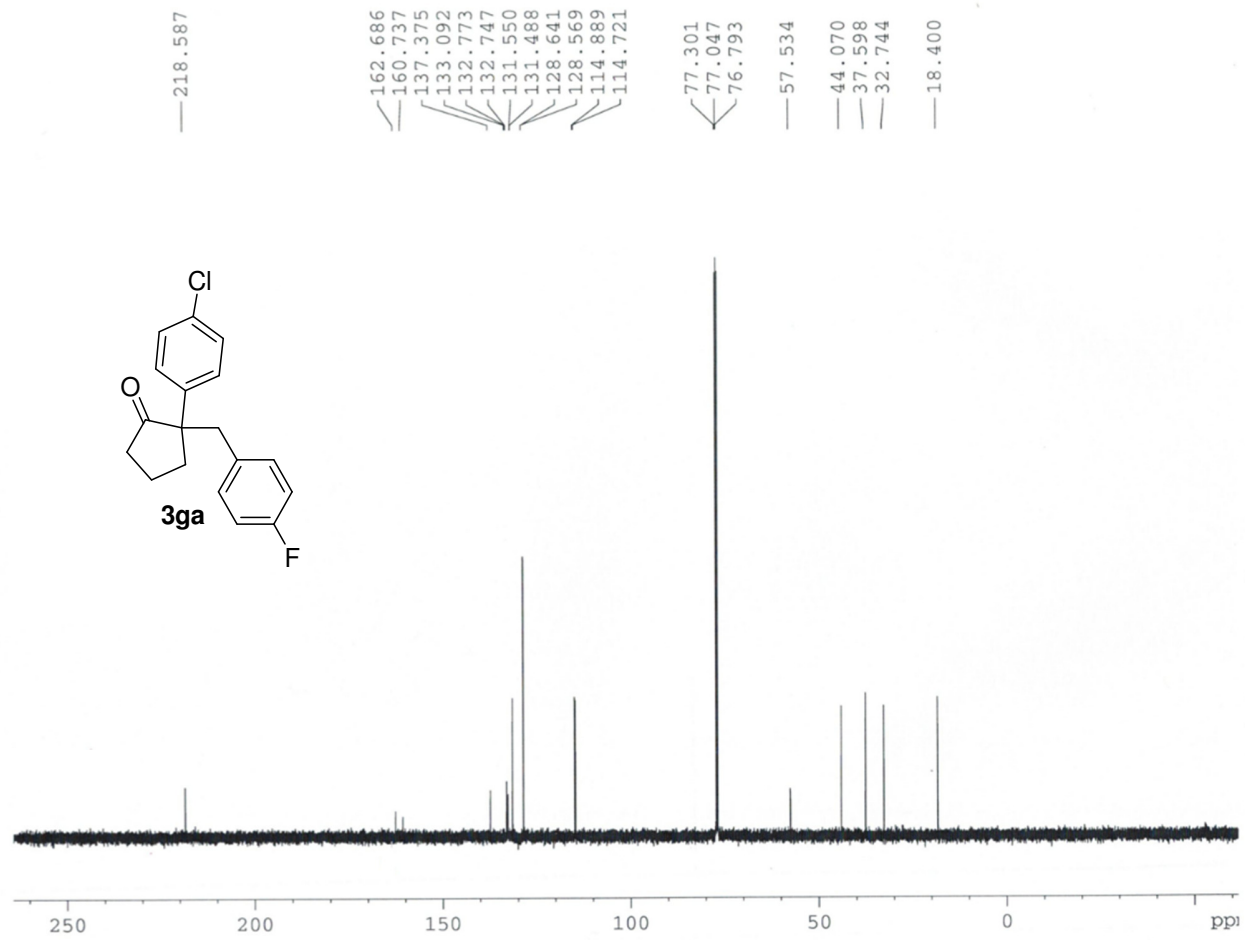

<sup>19</sup>F NMR spectra of compound **3ga**

-115.60  
-115.63  
-115.64  
-115.66  
-115.66  
-115.68

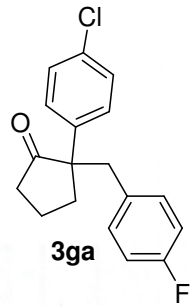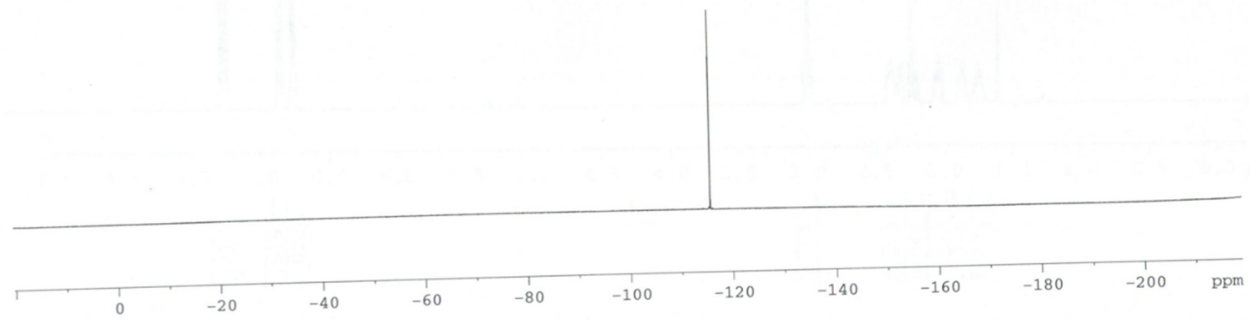

<sup>1</sup>H NMR spectra of compound **3ha**

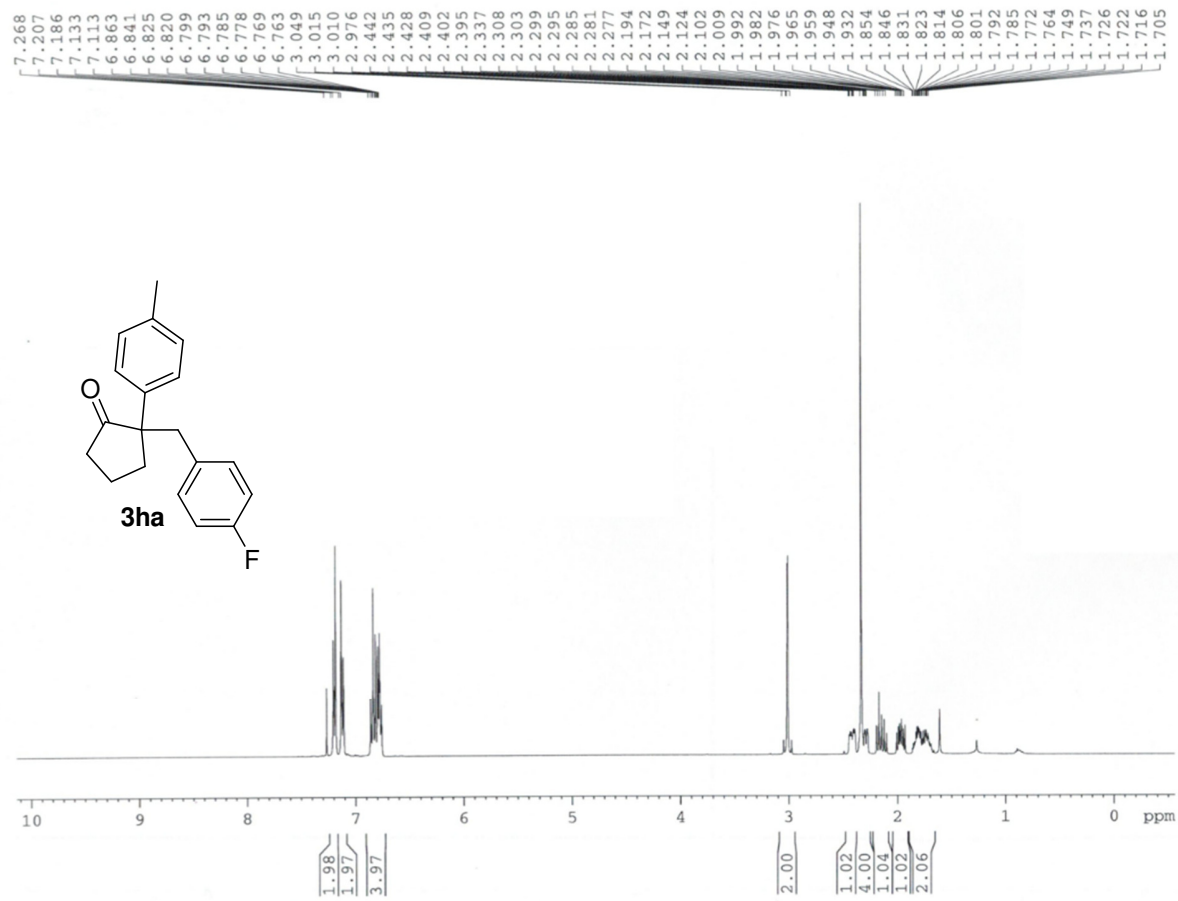

<sup>13</sup>C NMR spectra of compound **3ha**

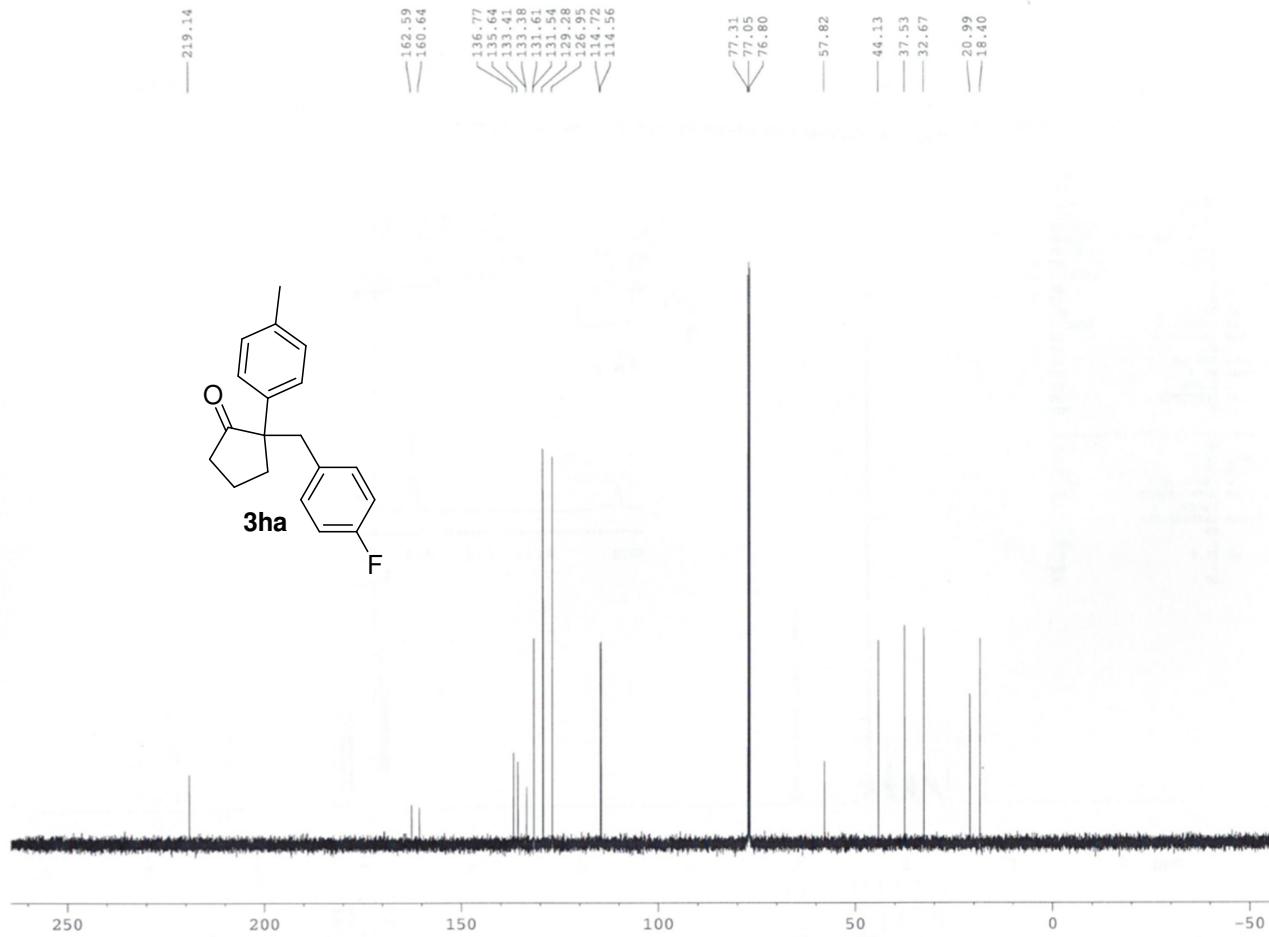

<sup>19</sup>F NMR spectra of compound **3ha**

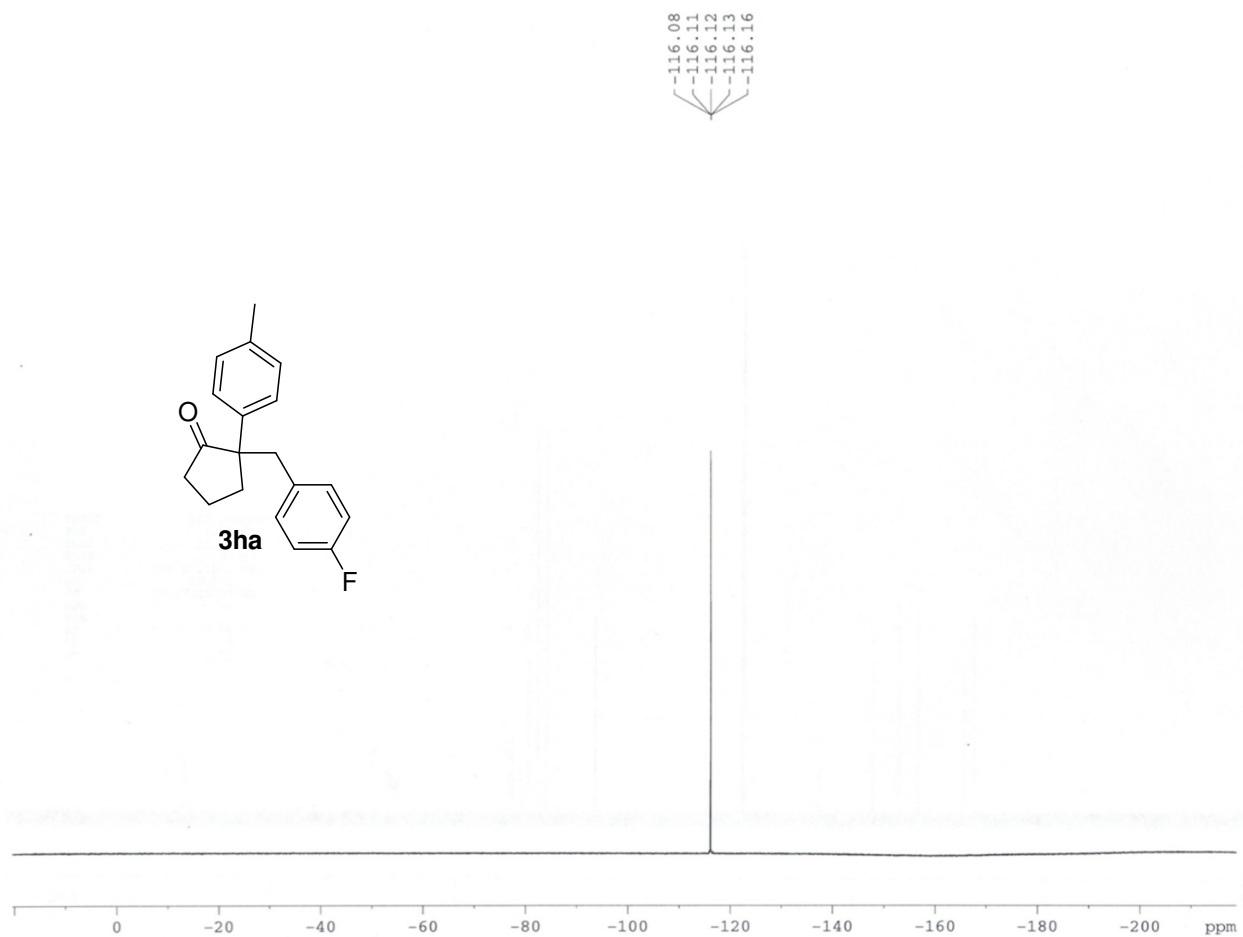

<sup>1</sup>H NMR spectra of compound **3ia**

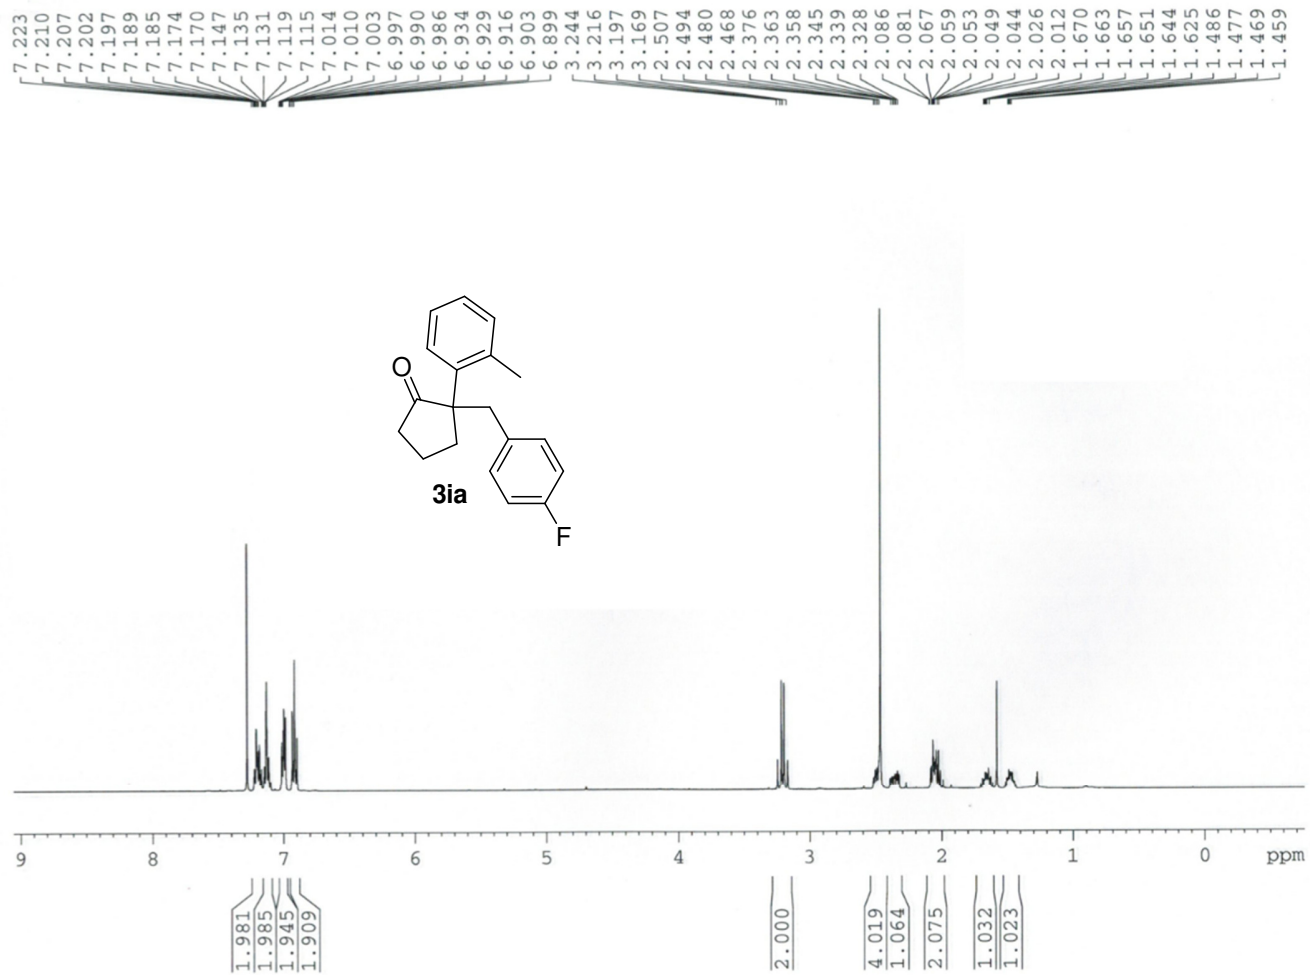

<sup>13</sup>C NMR spectra of compound **3ia**

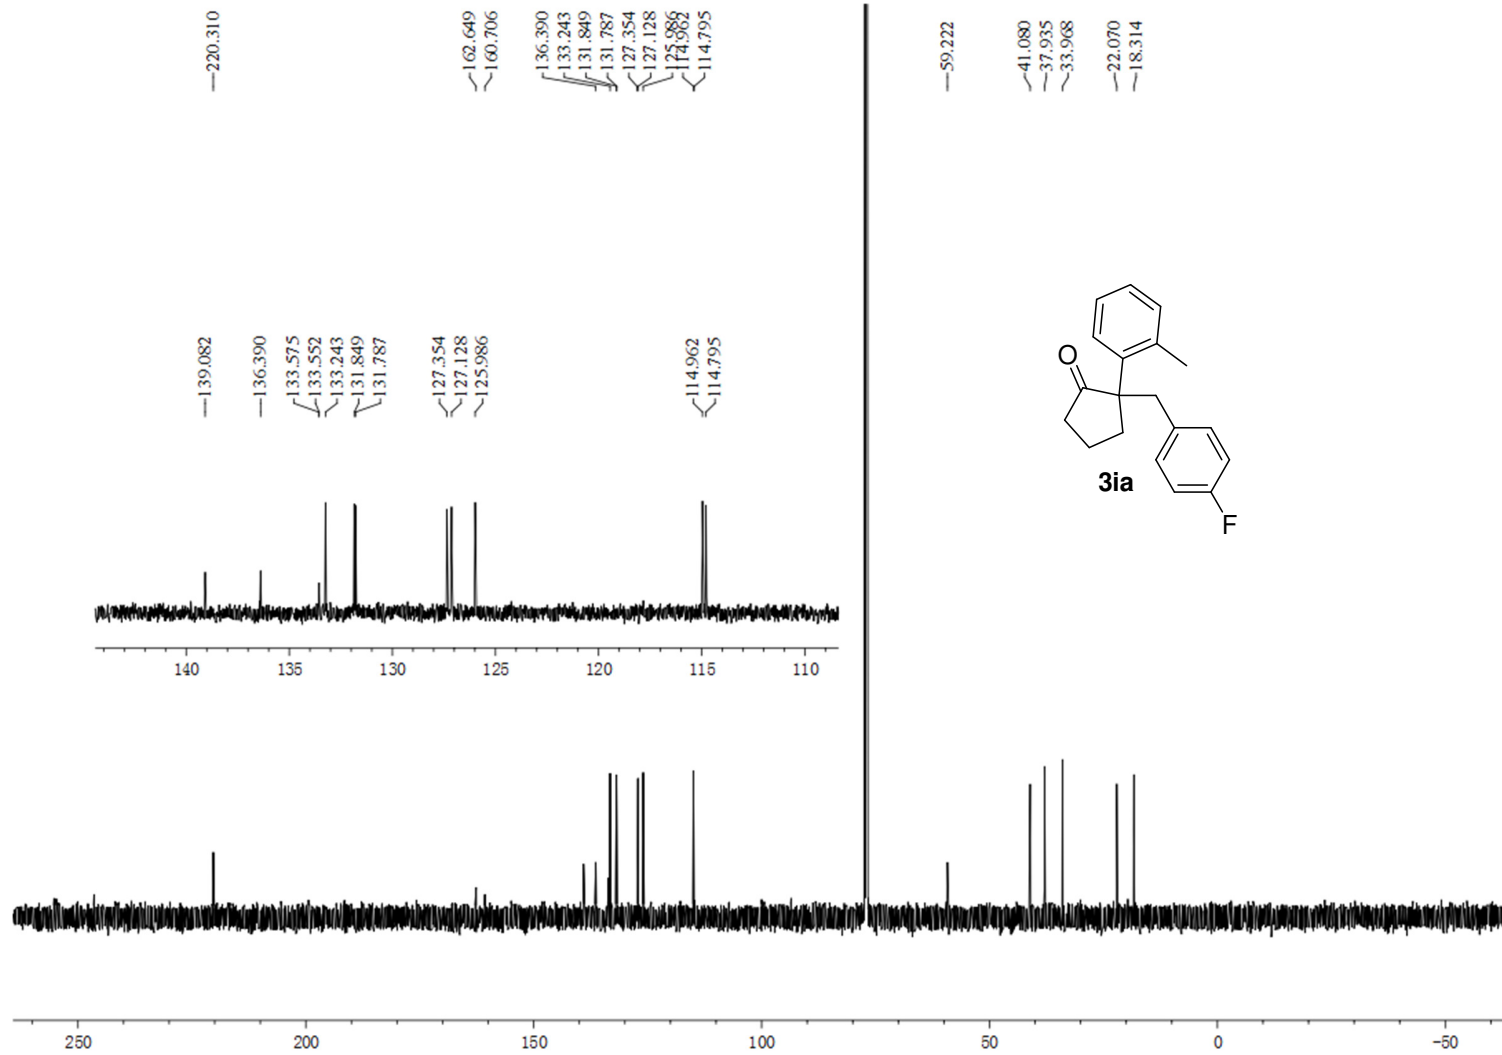



<sup>19</sup>F NMR spectra of compound **3ia**

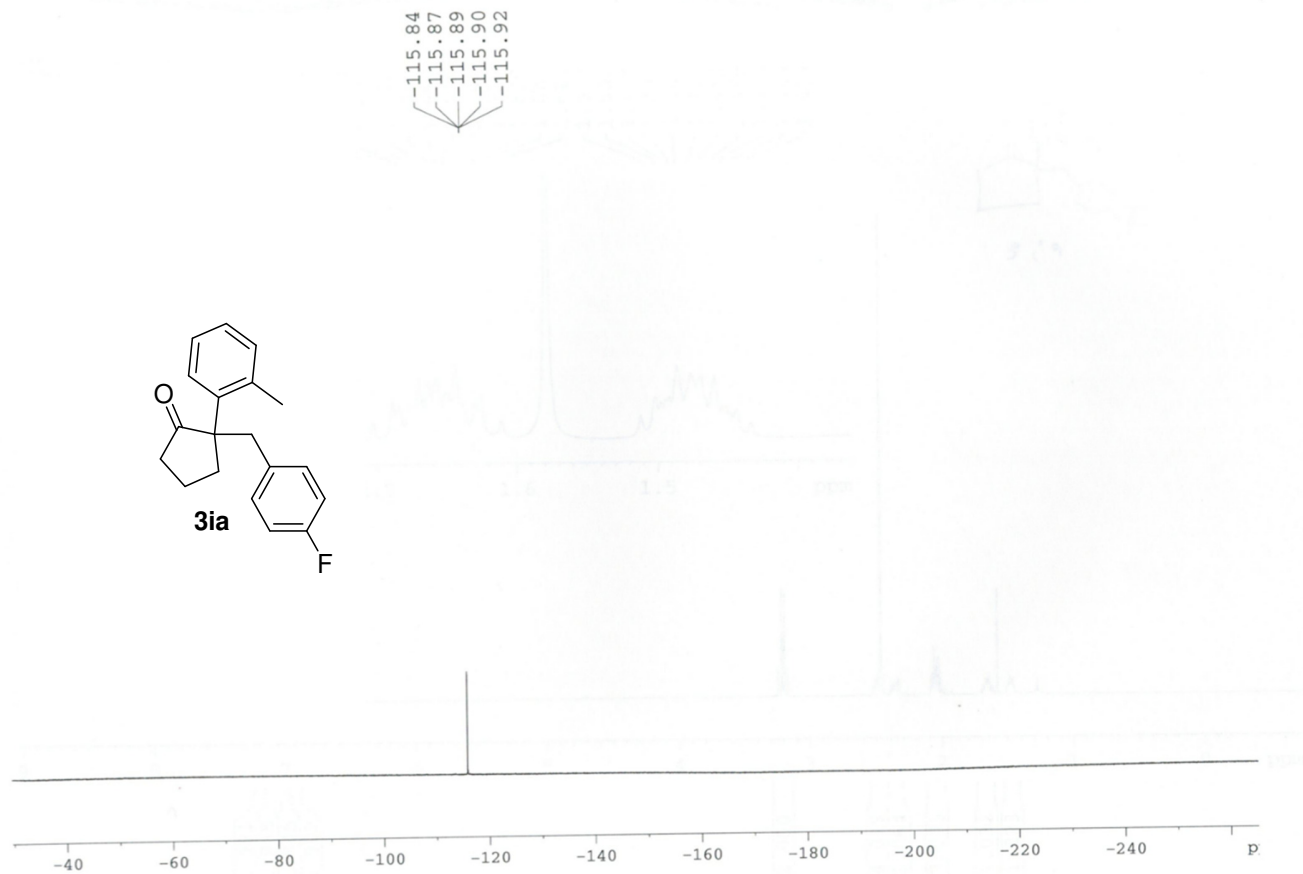

<sup>1</sup>H NMR spectra of compound **3ja**

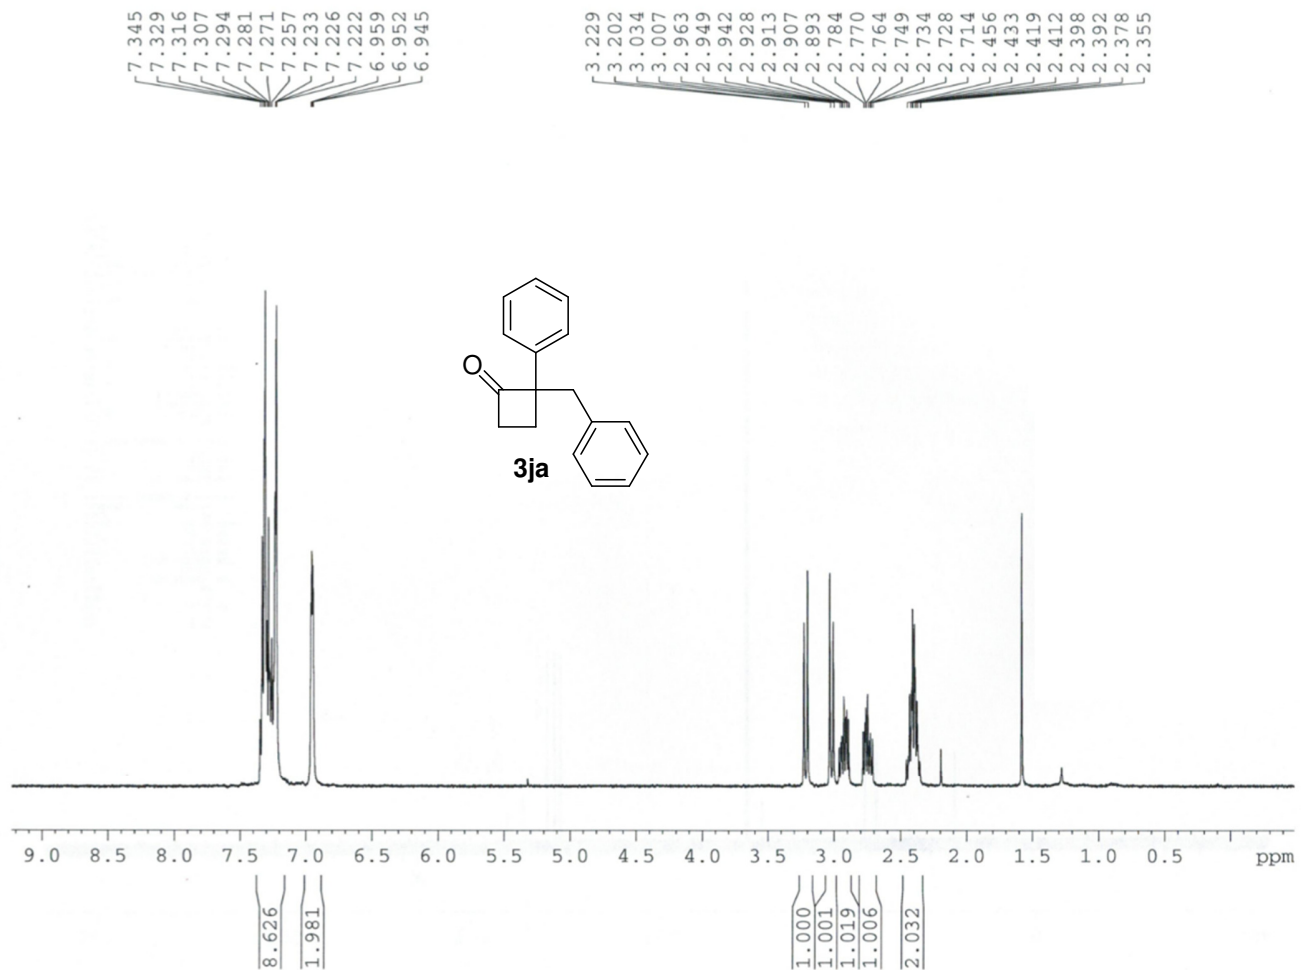

<sup>13</sup>C NMR spectra of compound **3ja**

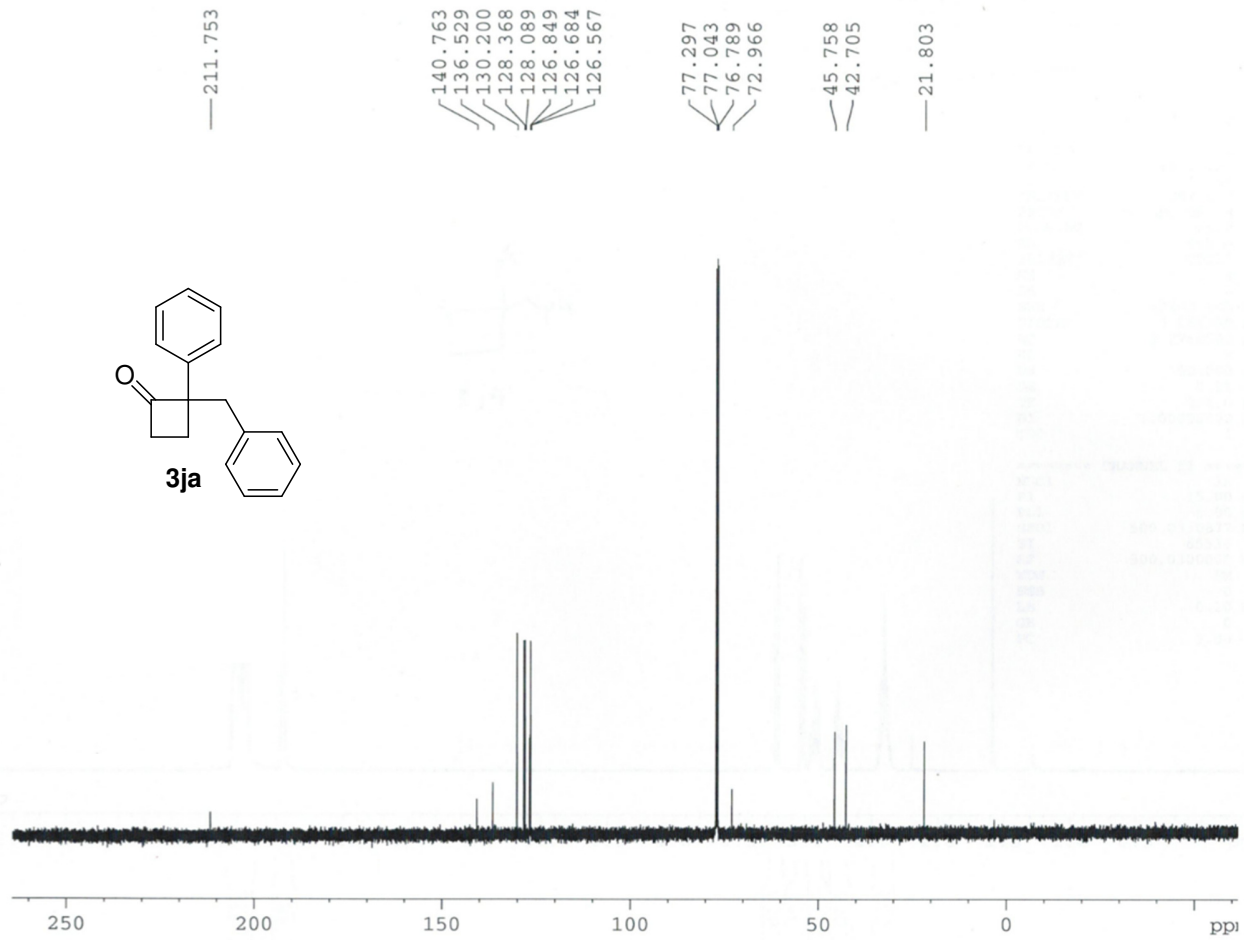

<sup>1</sup>H NMR spectra of compound **3ka**

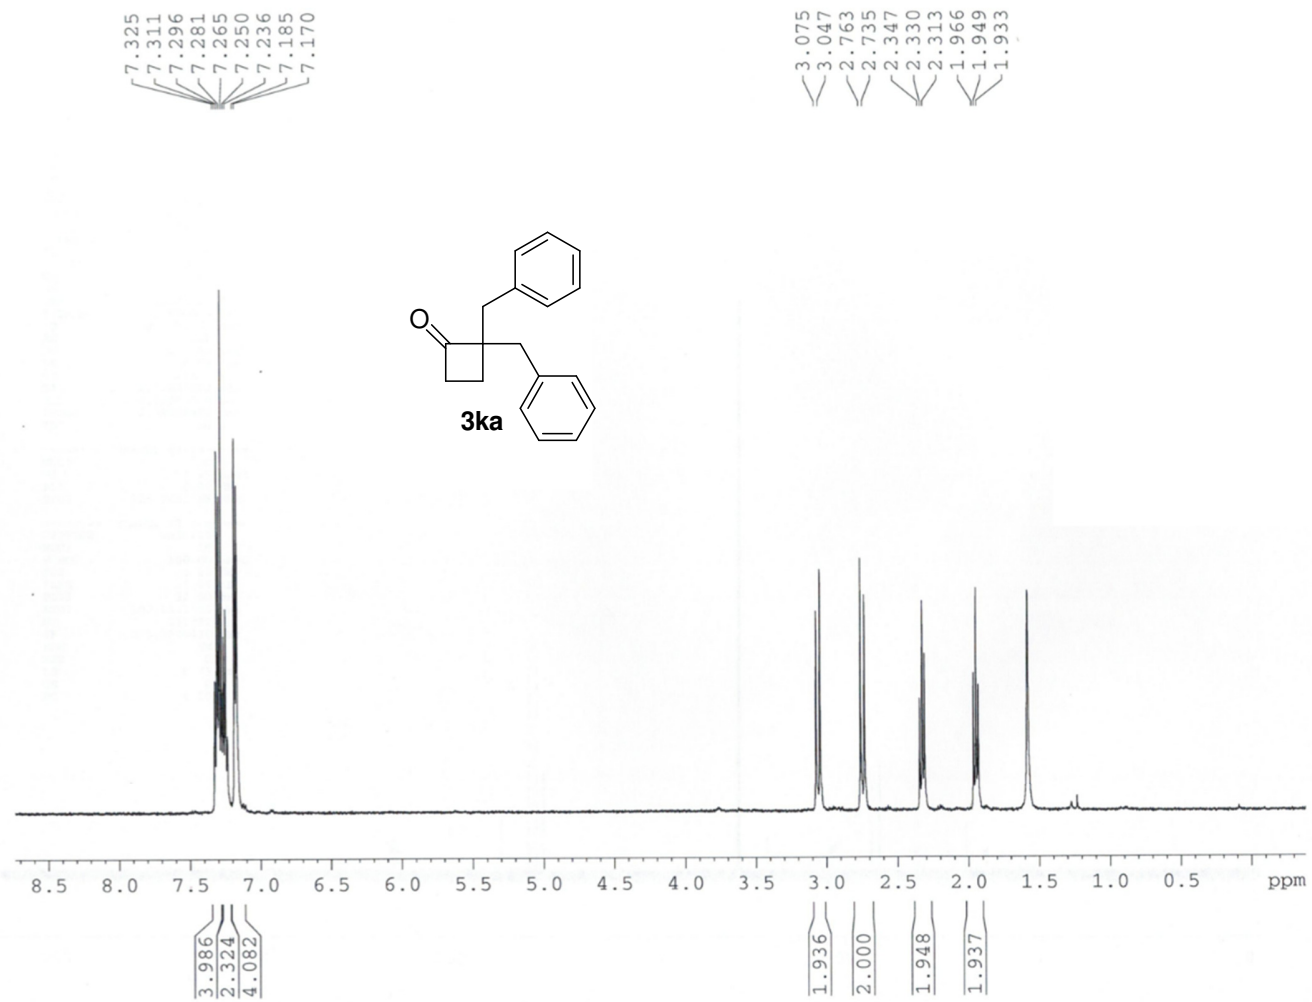

$^{13}\text{C}$  NMR spectra of compound **3ka**

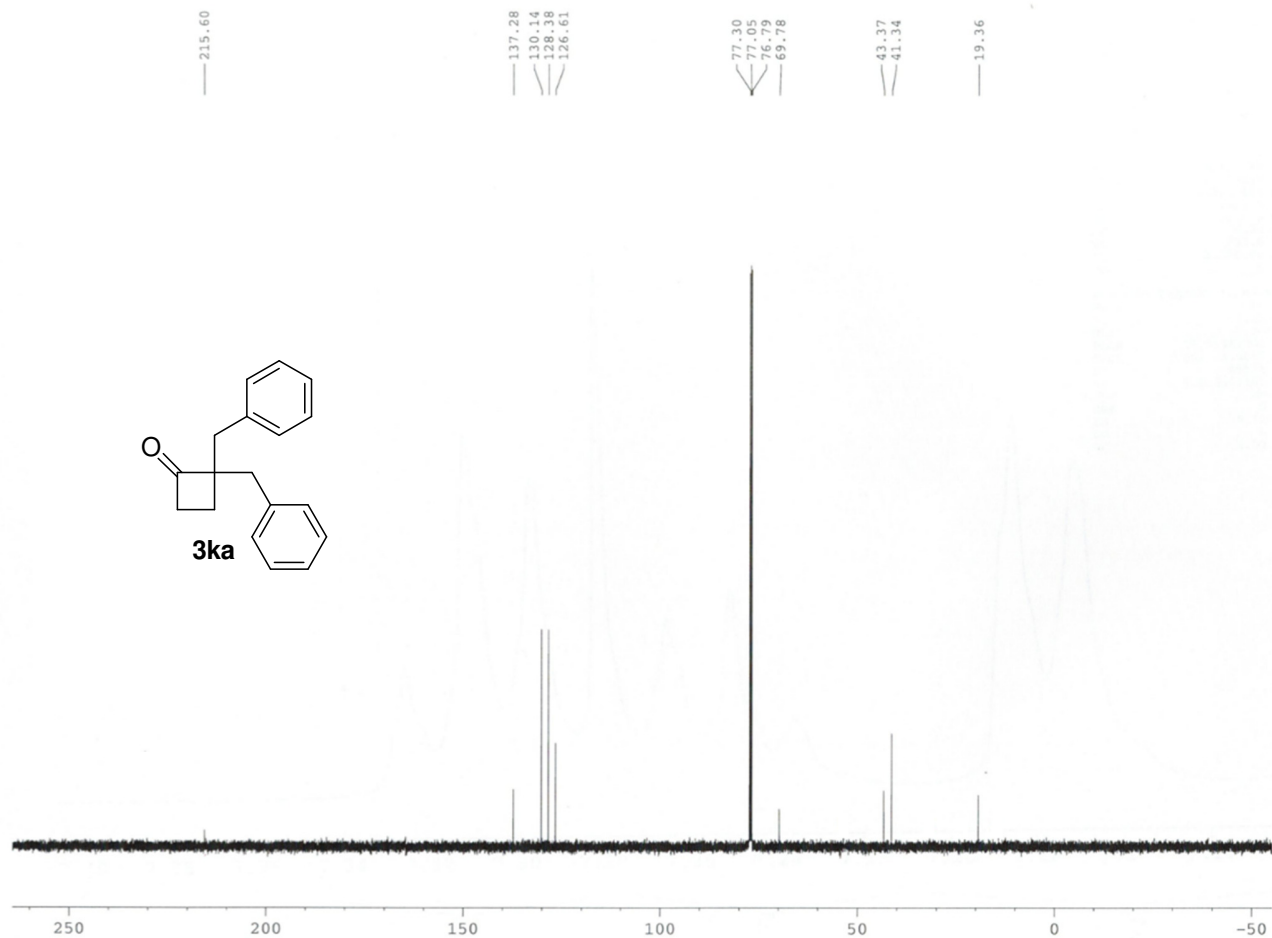

<sup>1</sup>H NMR spectra of compound **13a**

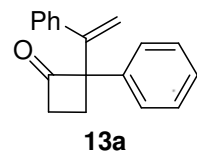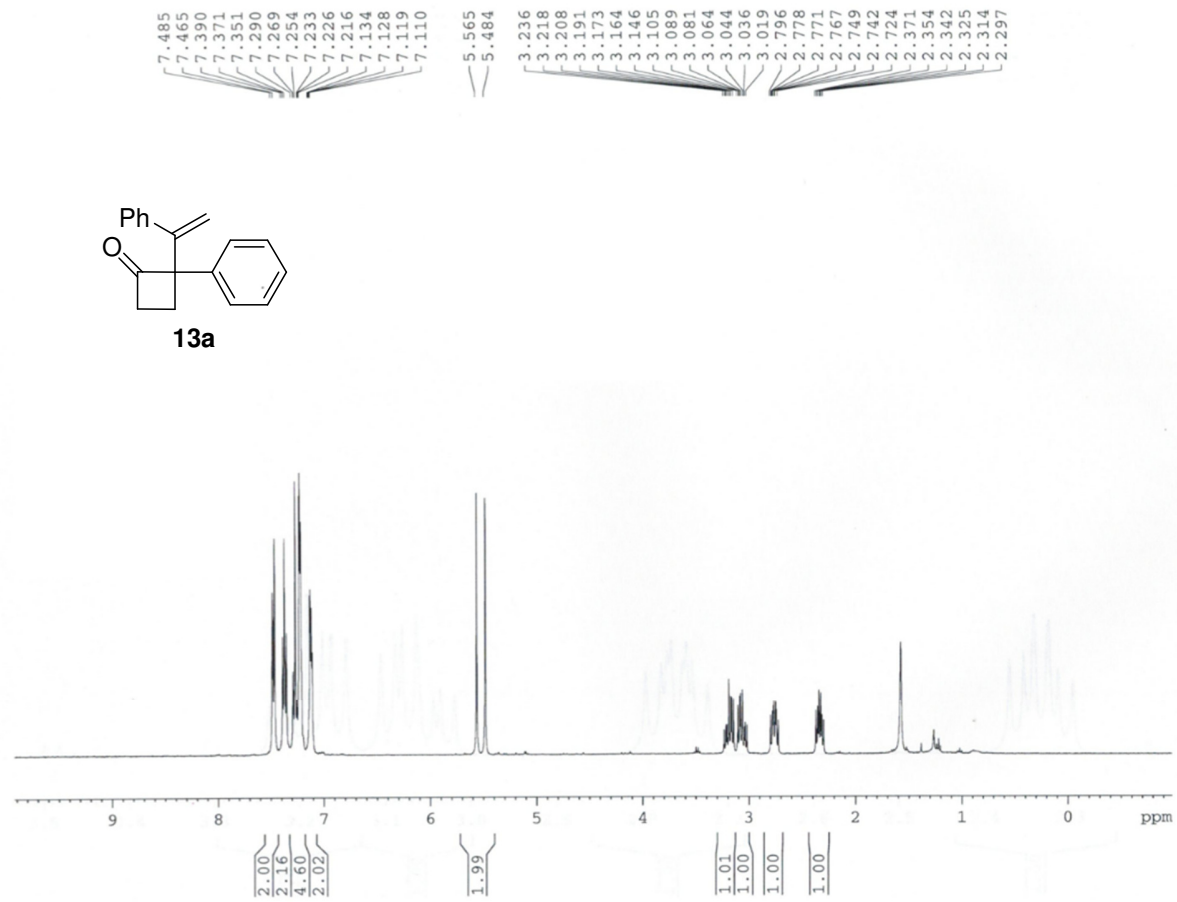

<sup>13</sup>C NMR spectra of compound **13a**

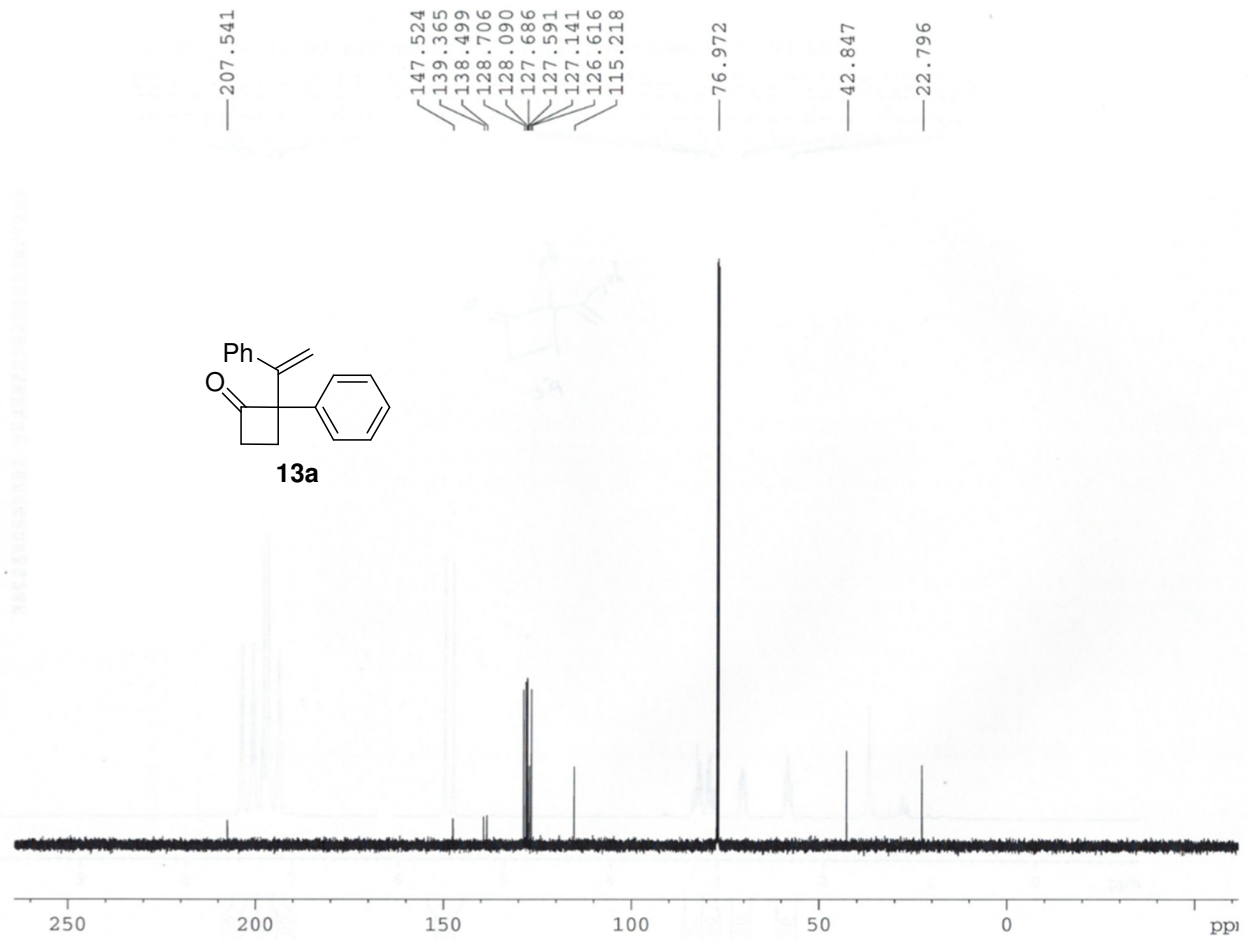

<sup>1</sup>H NMR spectra of compound **13b**

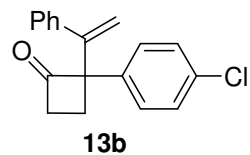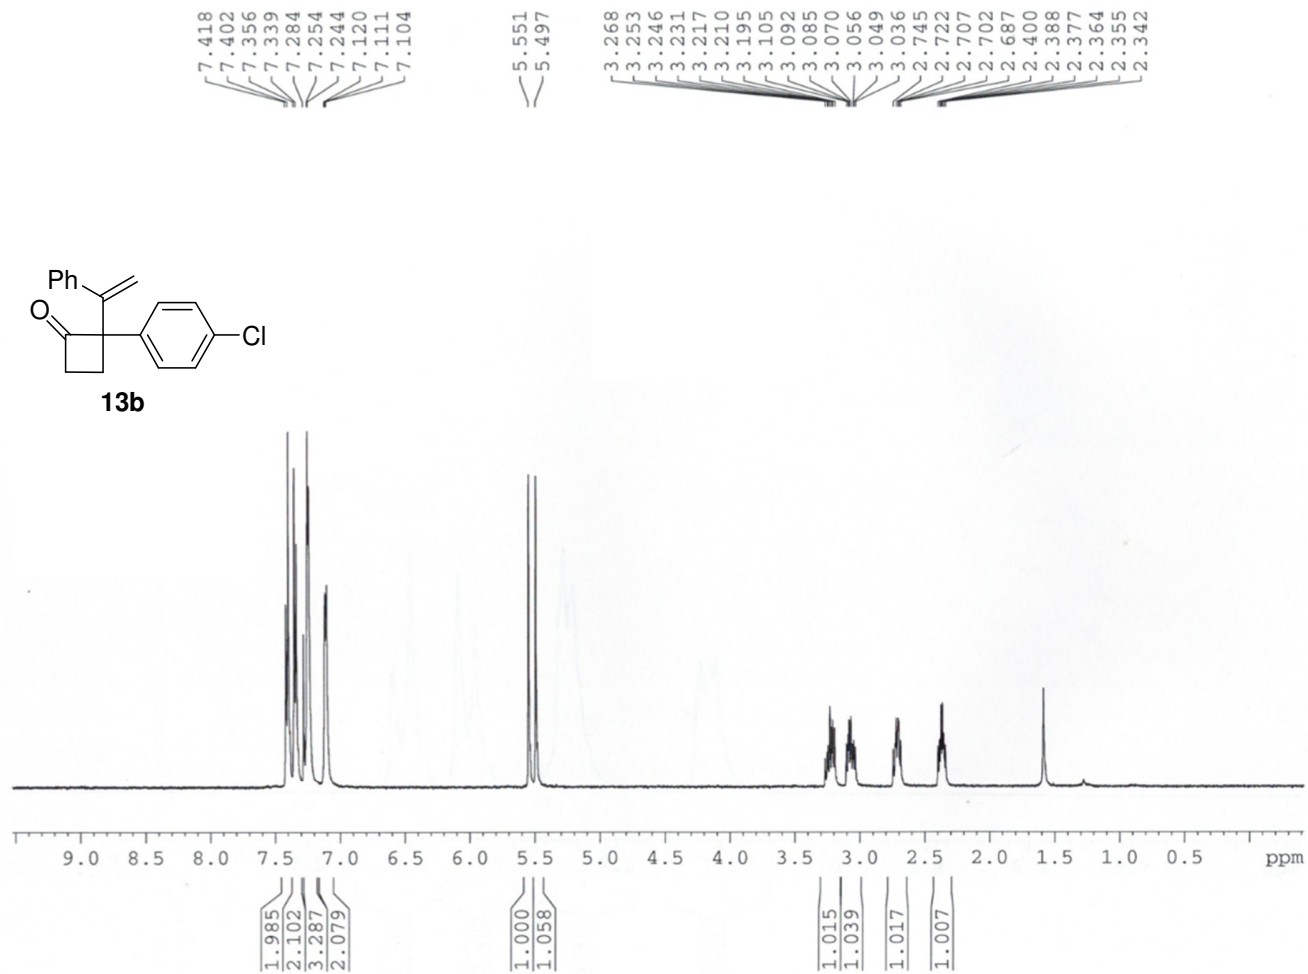



$^{13}\text{C}$  NMR spectra of compound **13b**

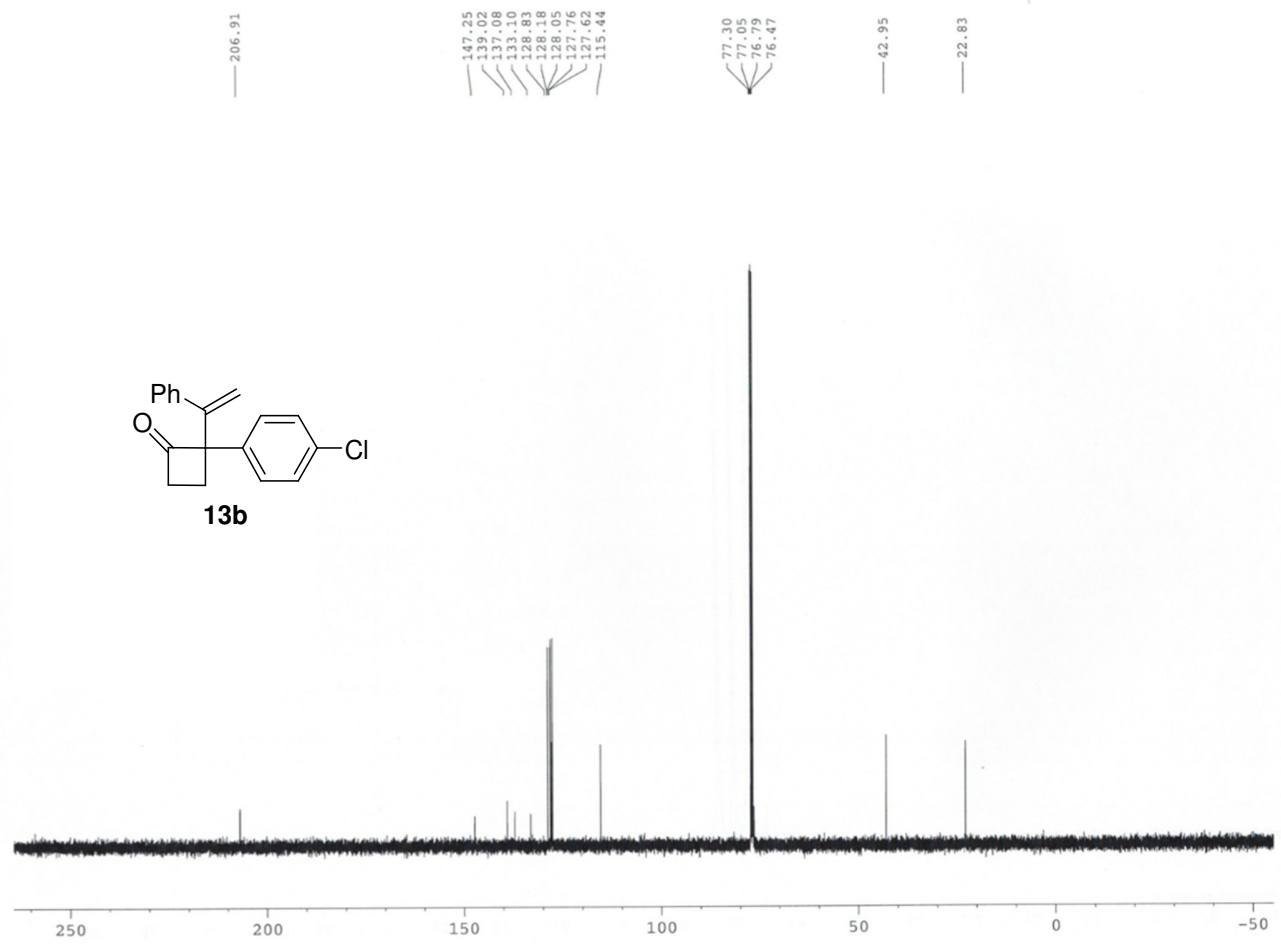

<sup>1</sup>H NMR spectra of compound **13c**

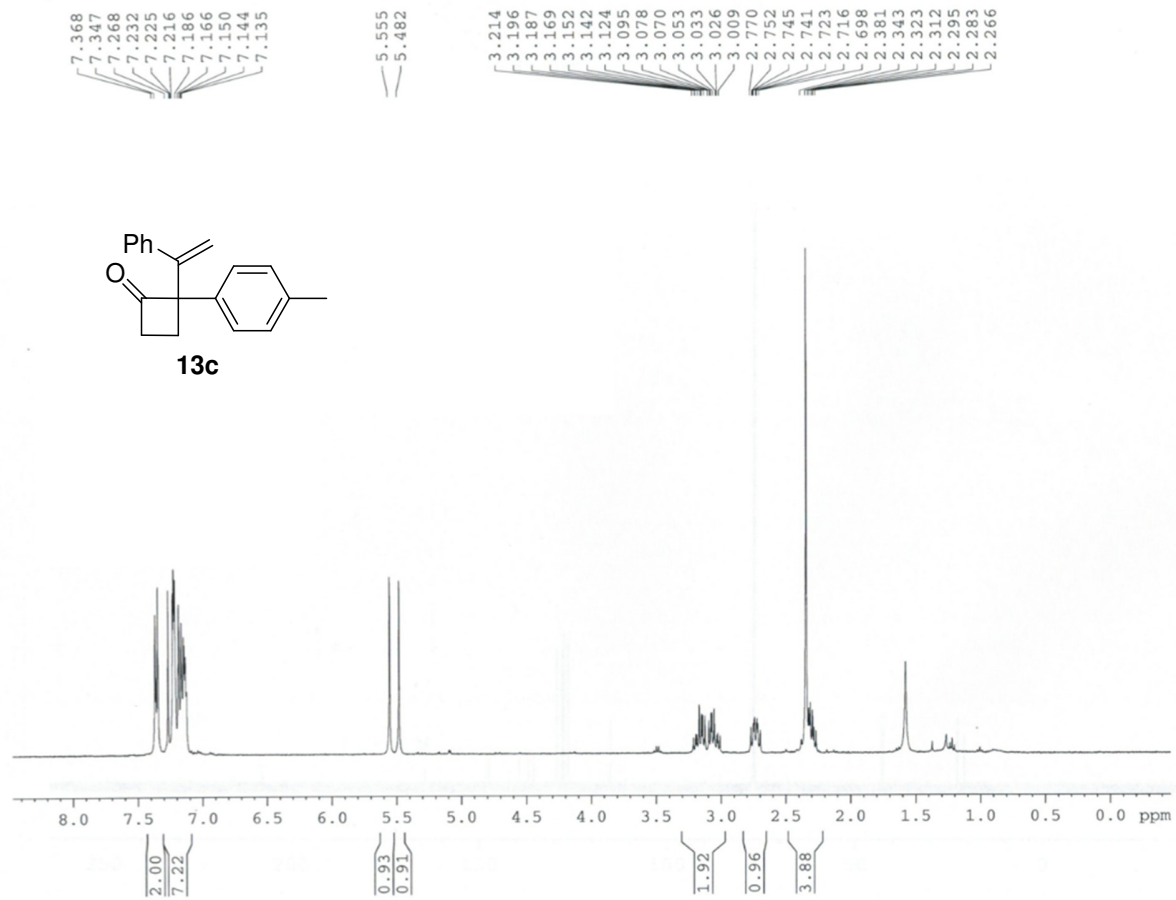

<sup>13</sup>C NMR spectra of compound **13c**

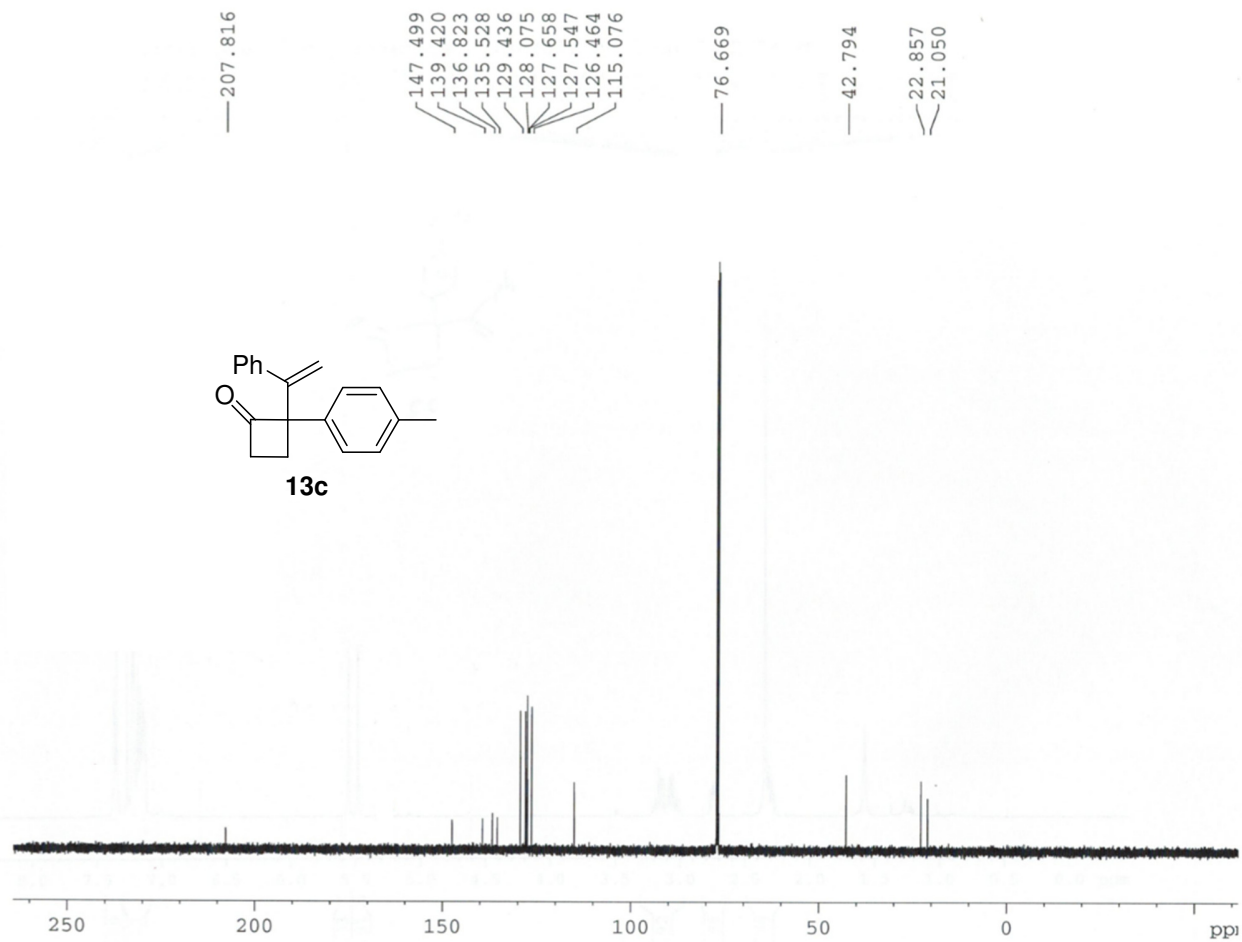

<sup>1</sup>H NMR spectra of compound **13d**

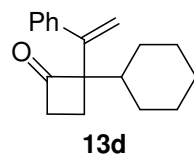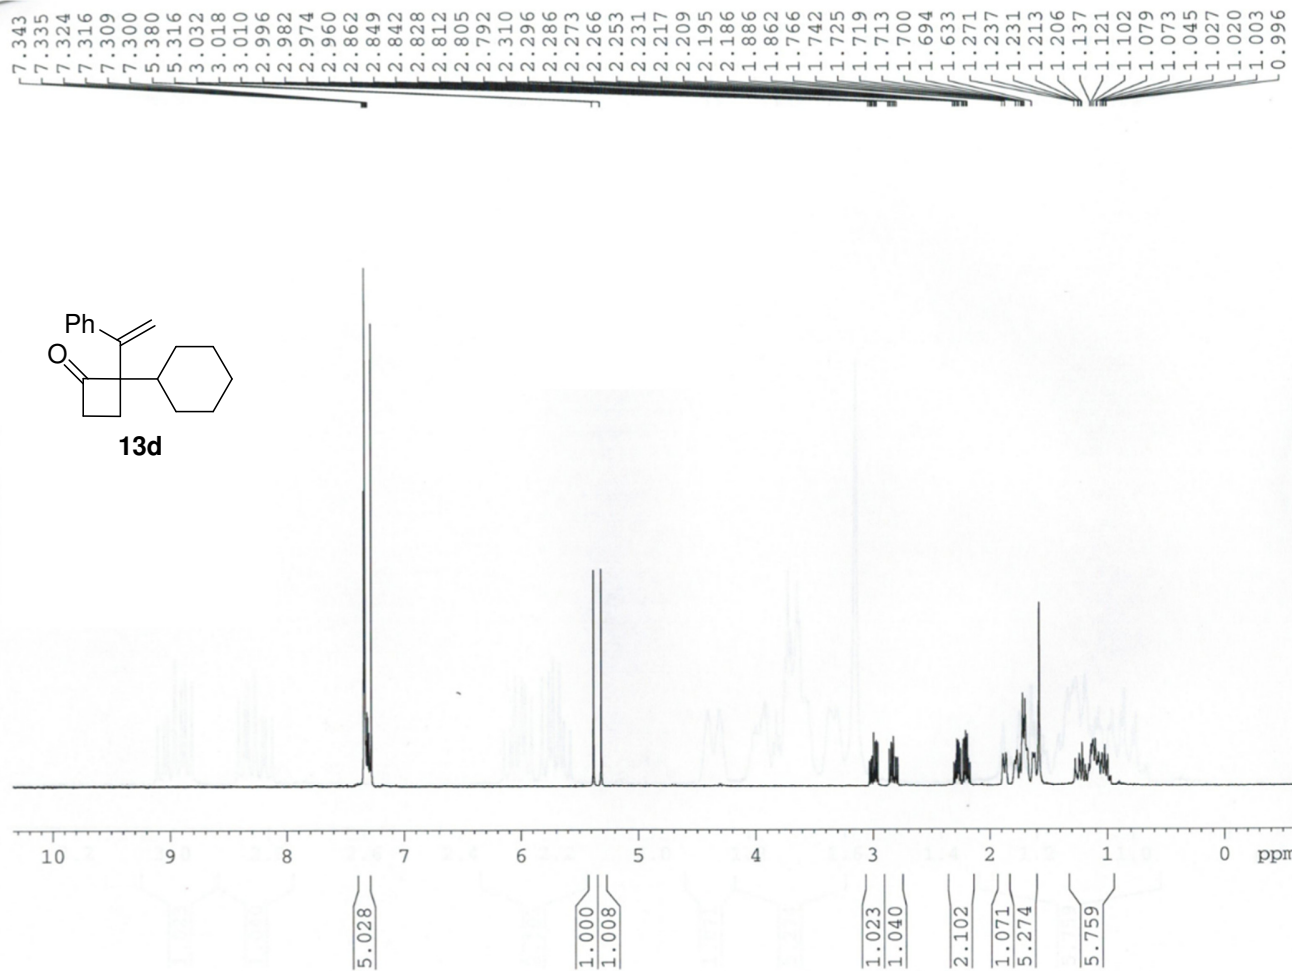

<sup>13</sup>C NMR spectra of compound **13d**

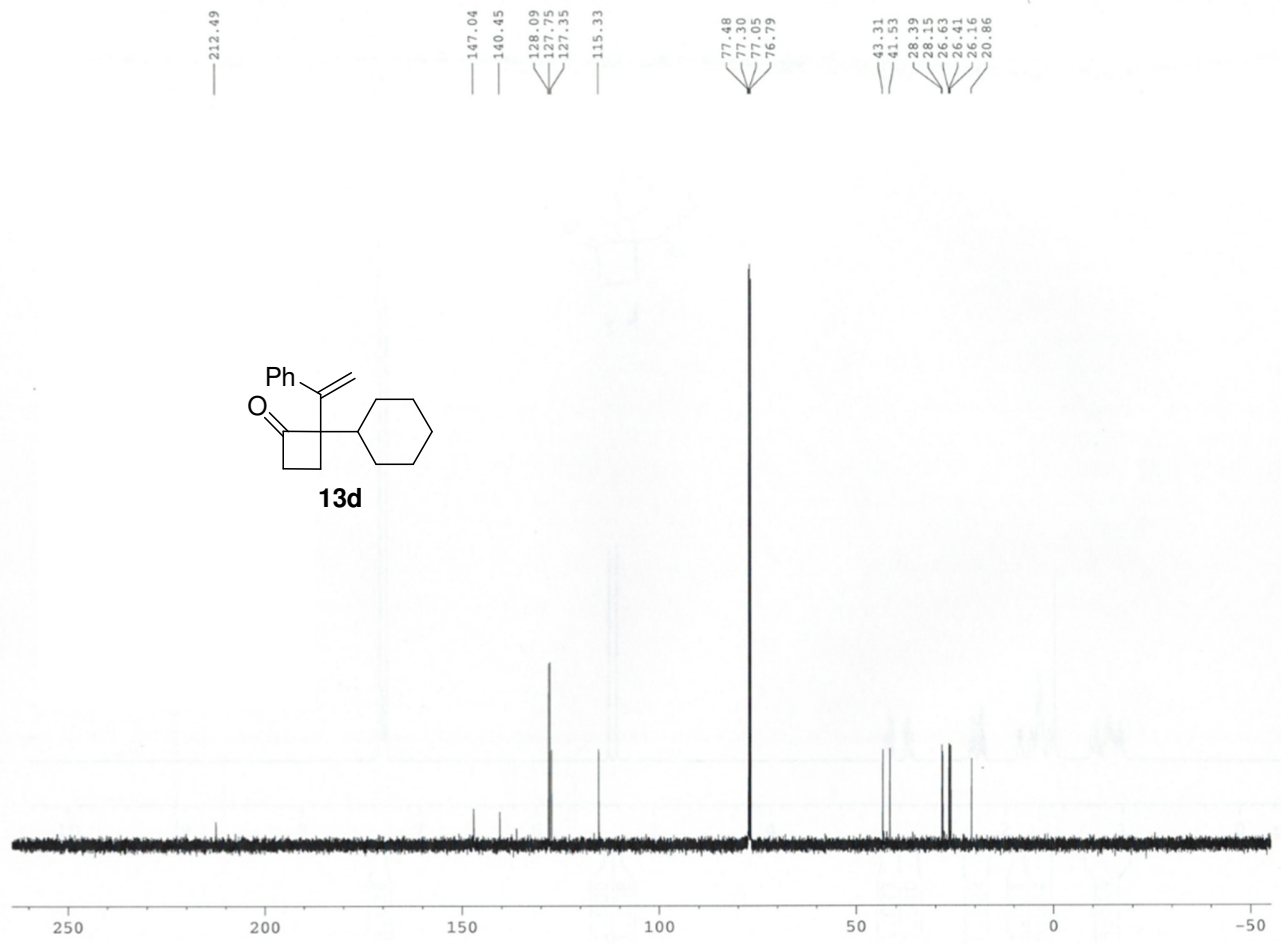

<sup>1</sup>H NMR spectra of compound **13e**

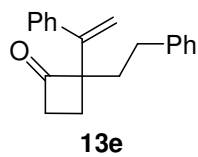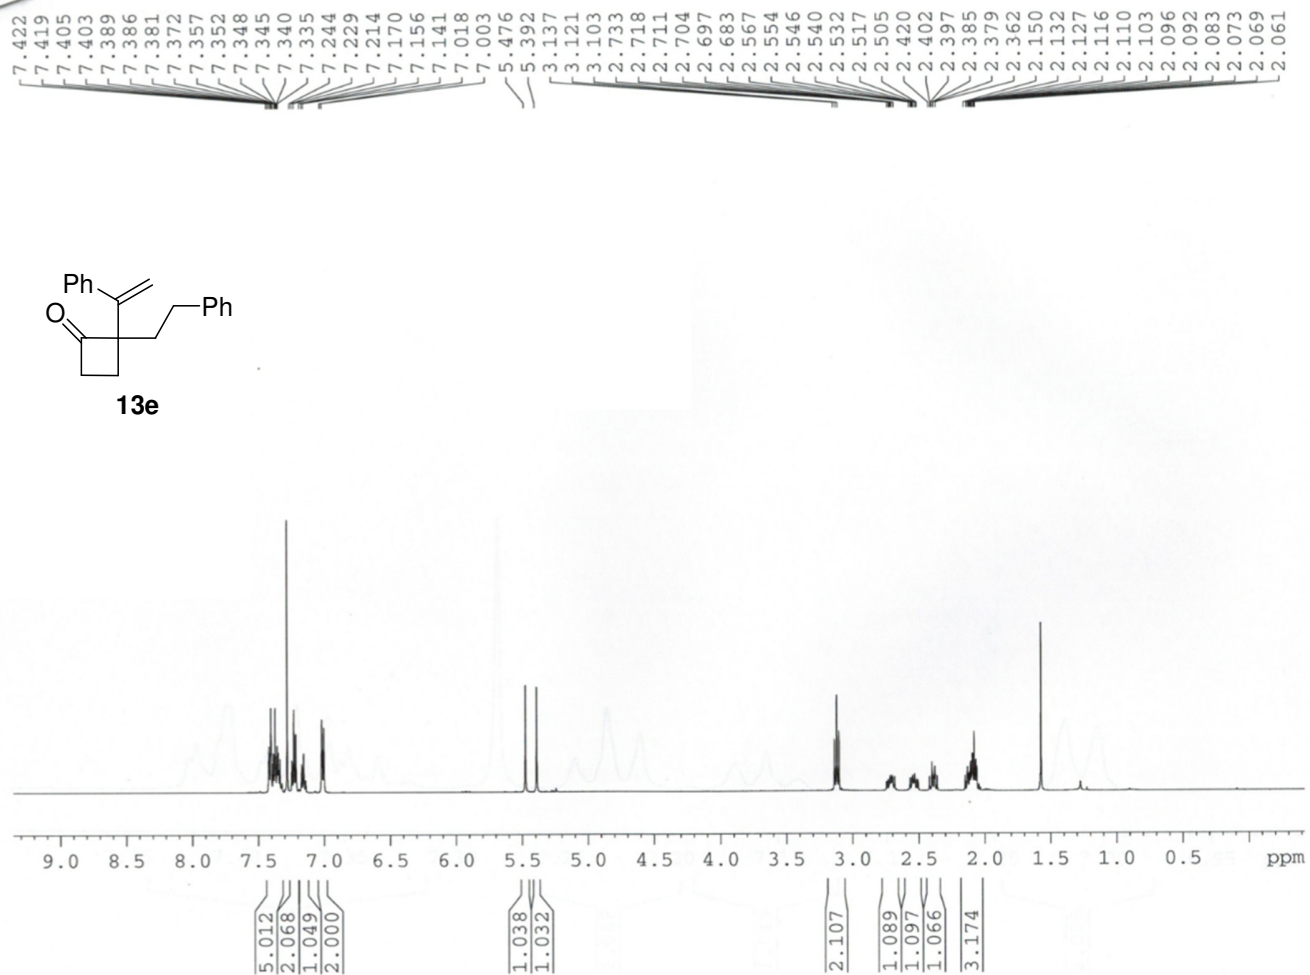

$^{13}\text{C}$  NMR spectra of compound **13e**

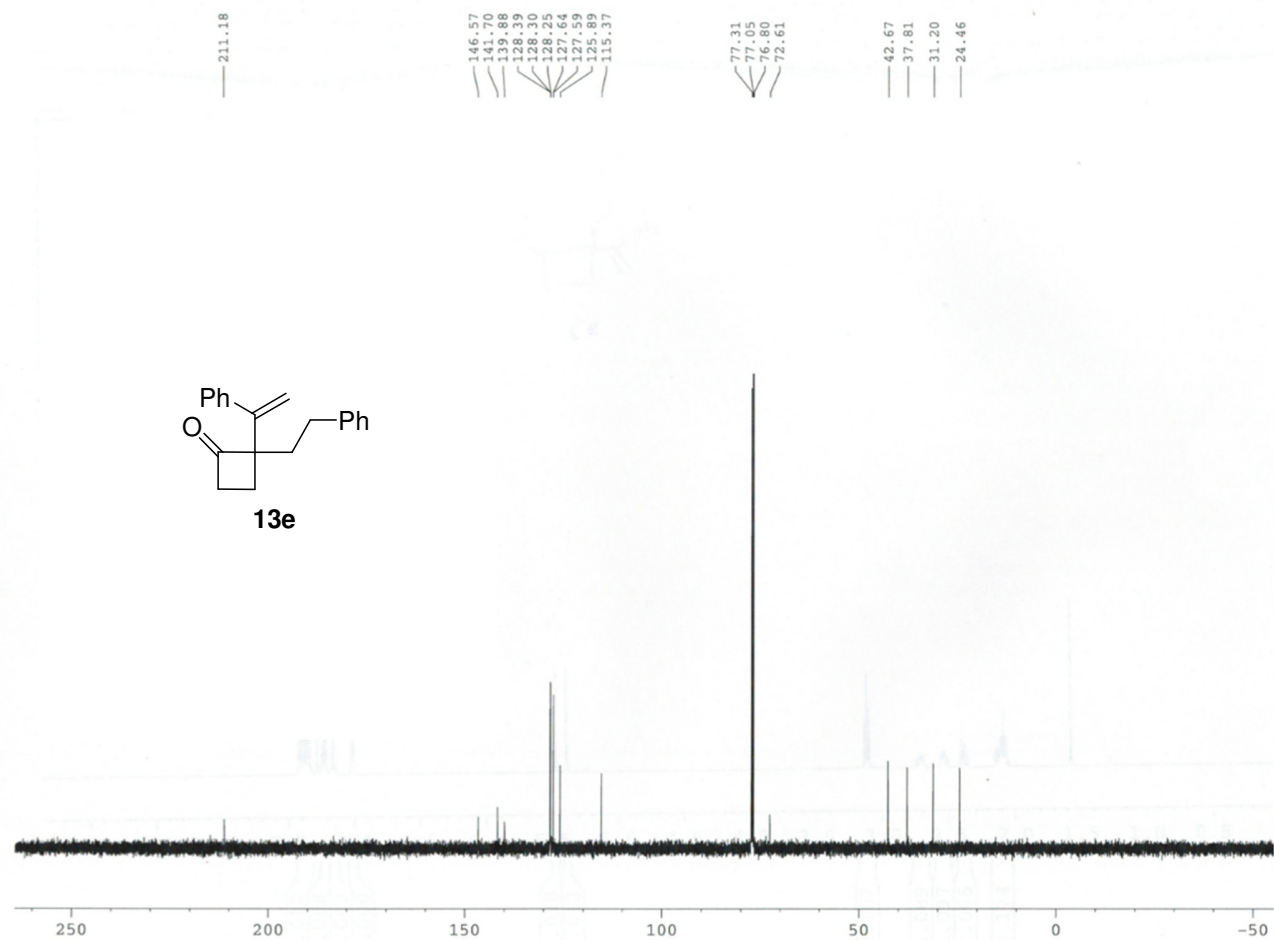

# <sup>1</sup>H NMR spectra of compound 6

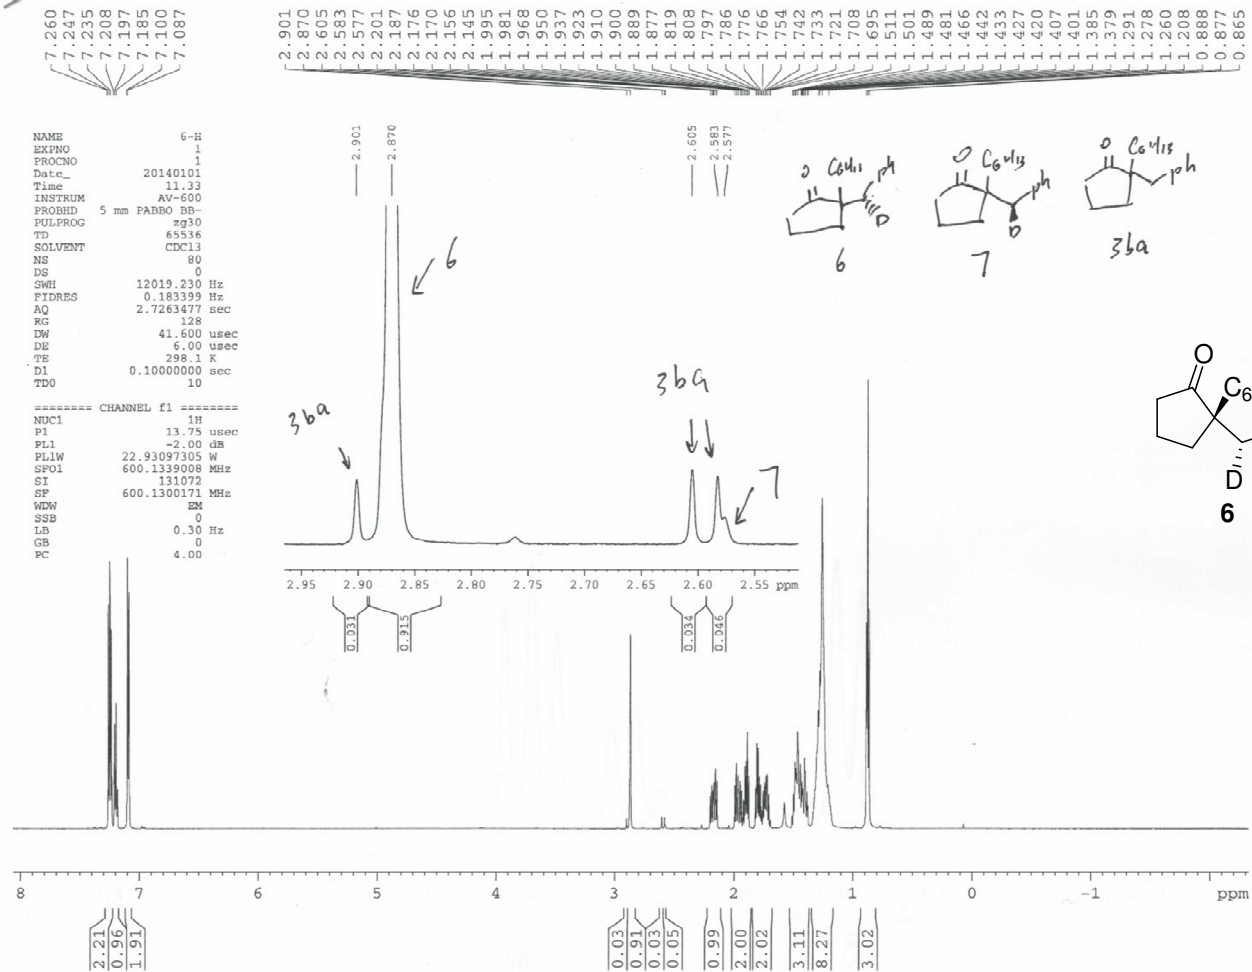



# <sup>13</sup>C NMR spectra of compound 6

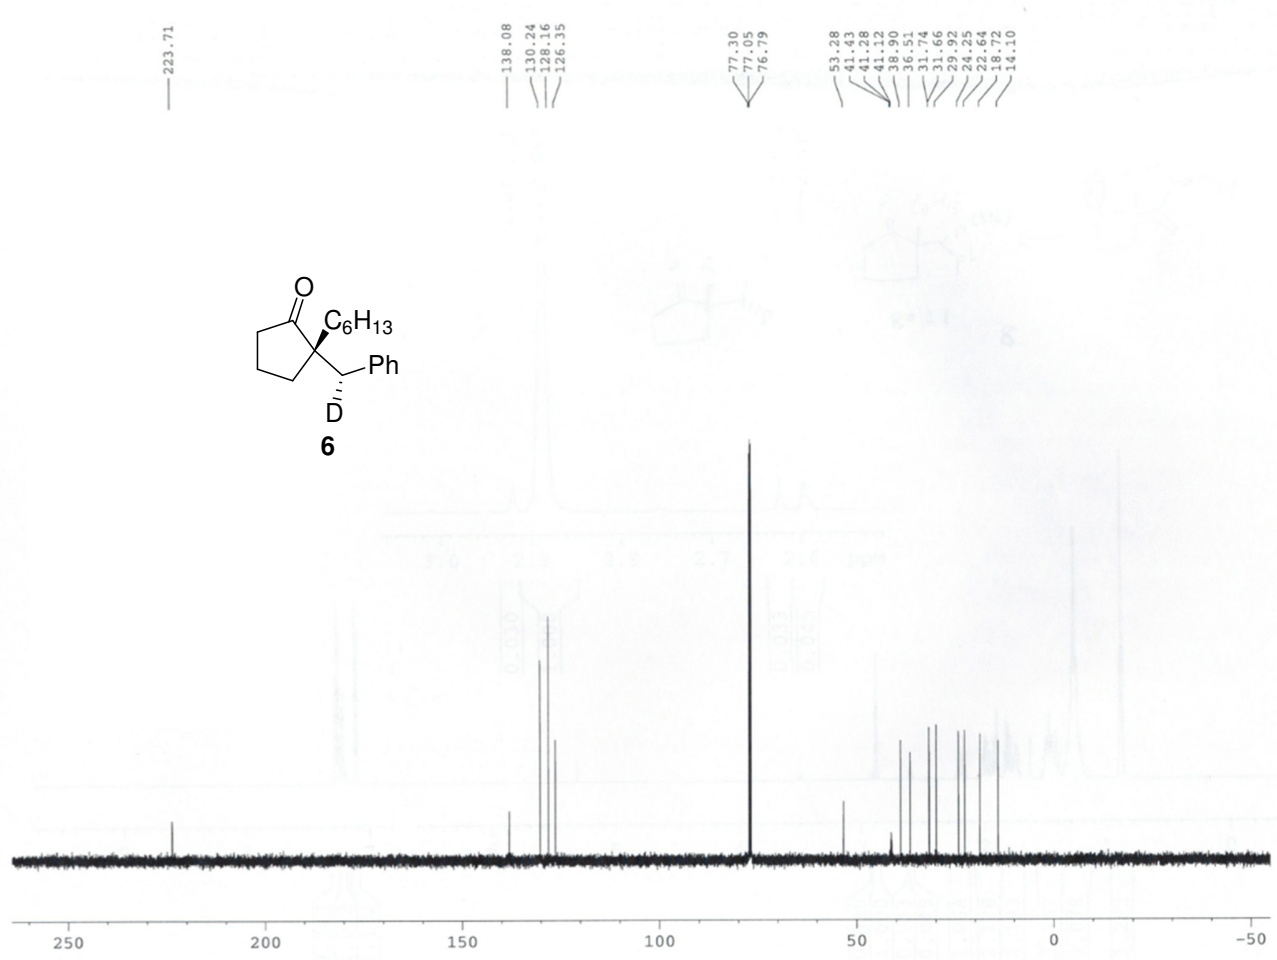

<sup>1</sup>H NMR spectra of compound **7**

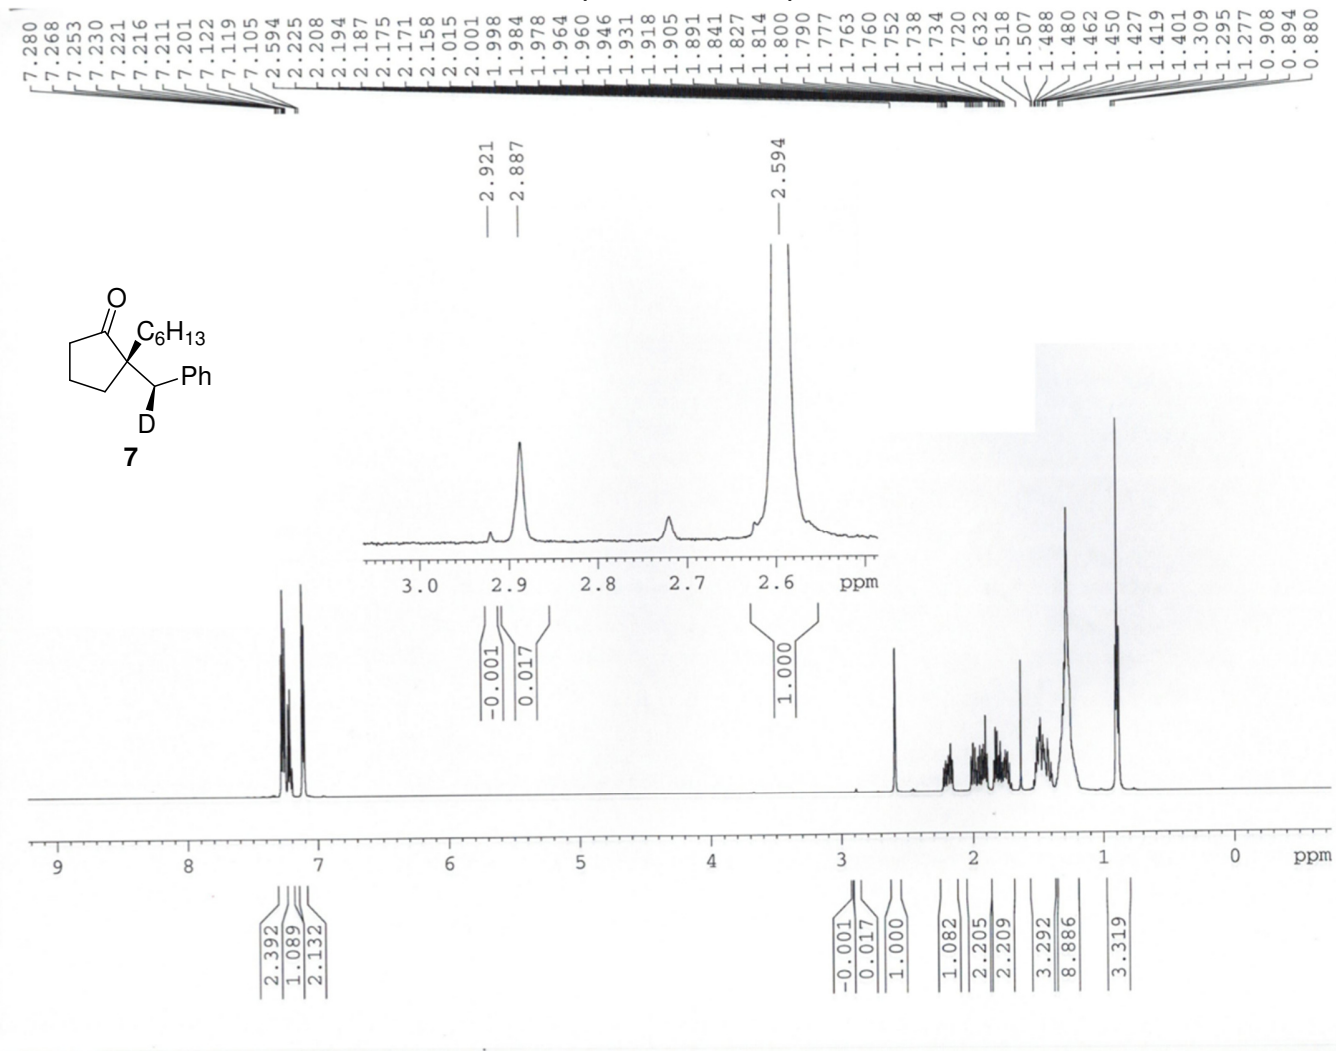

<sup>13</sup>C NMR spectra of compound **7**

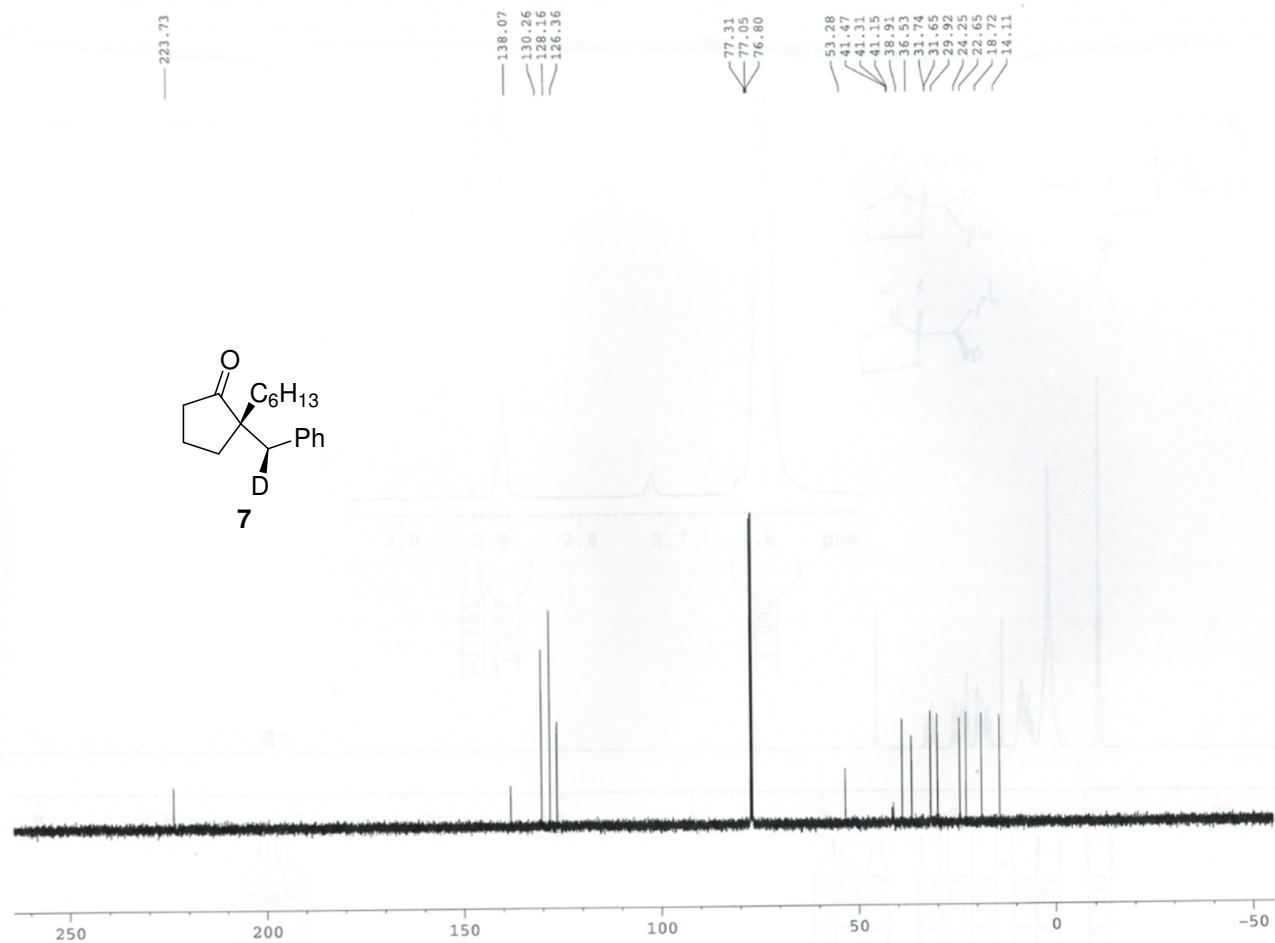

# <sup>1</sup>H NMR spectra of compound **3ba-2**

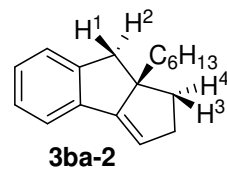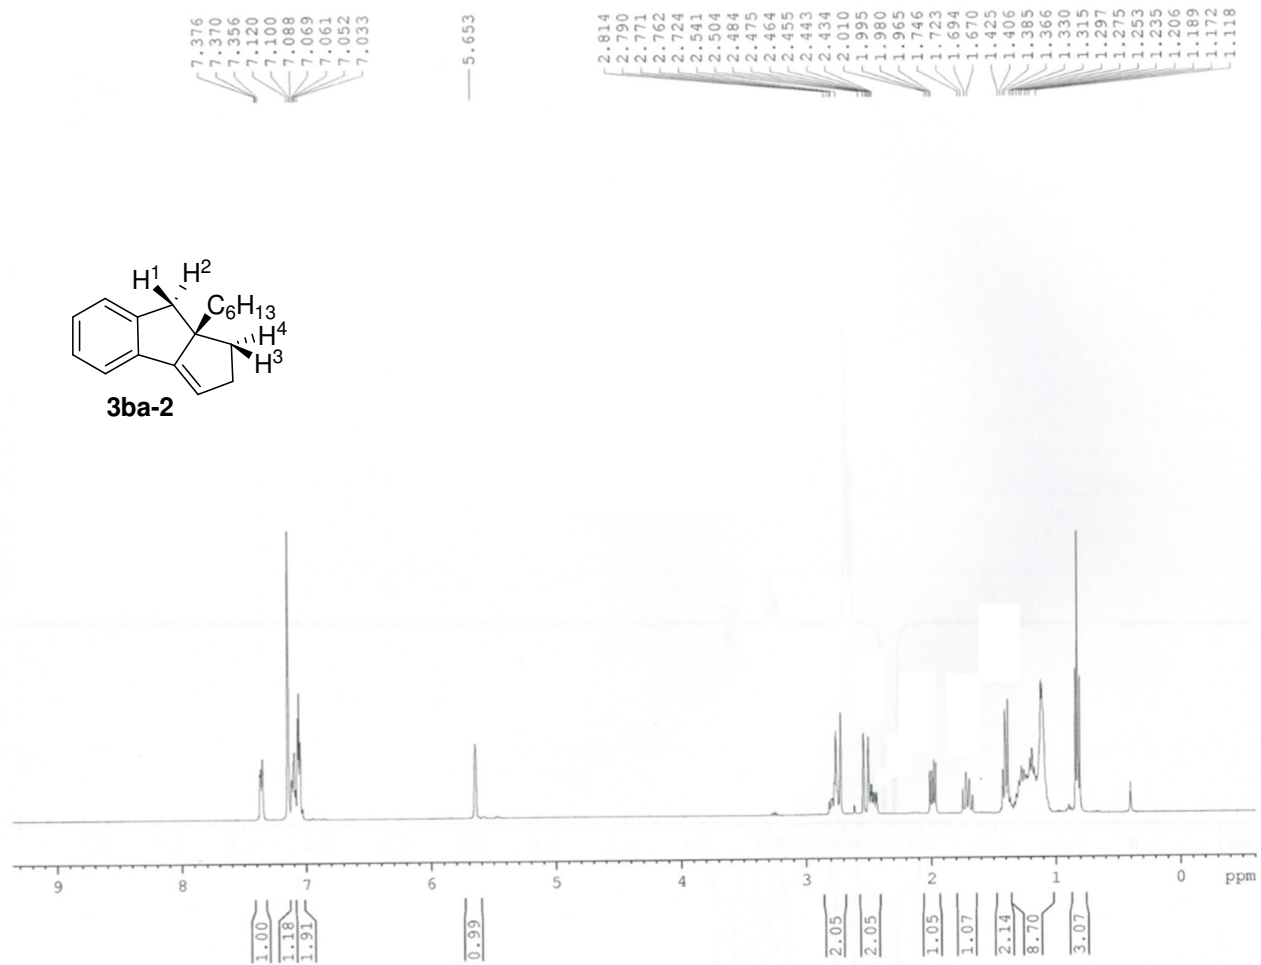

<sup>13</sup>C NMR spectra of compound **3ba-2**

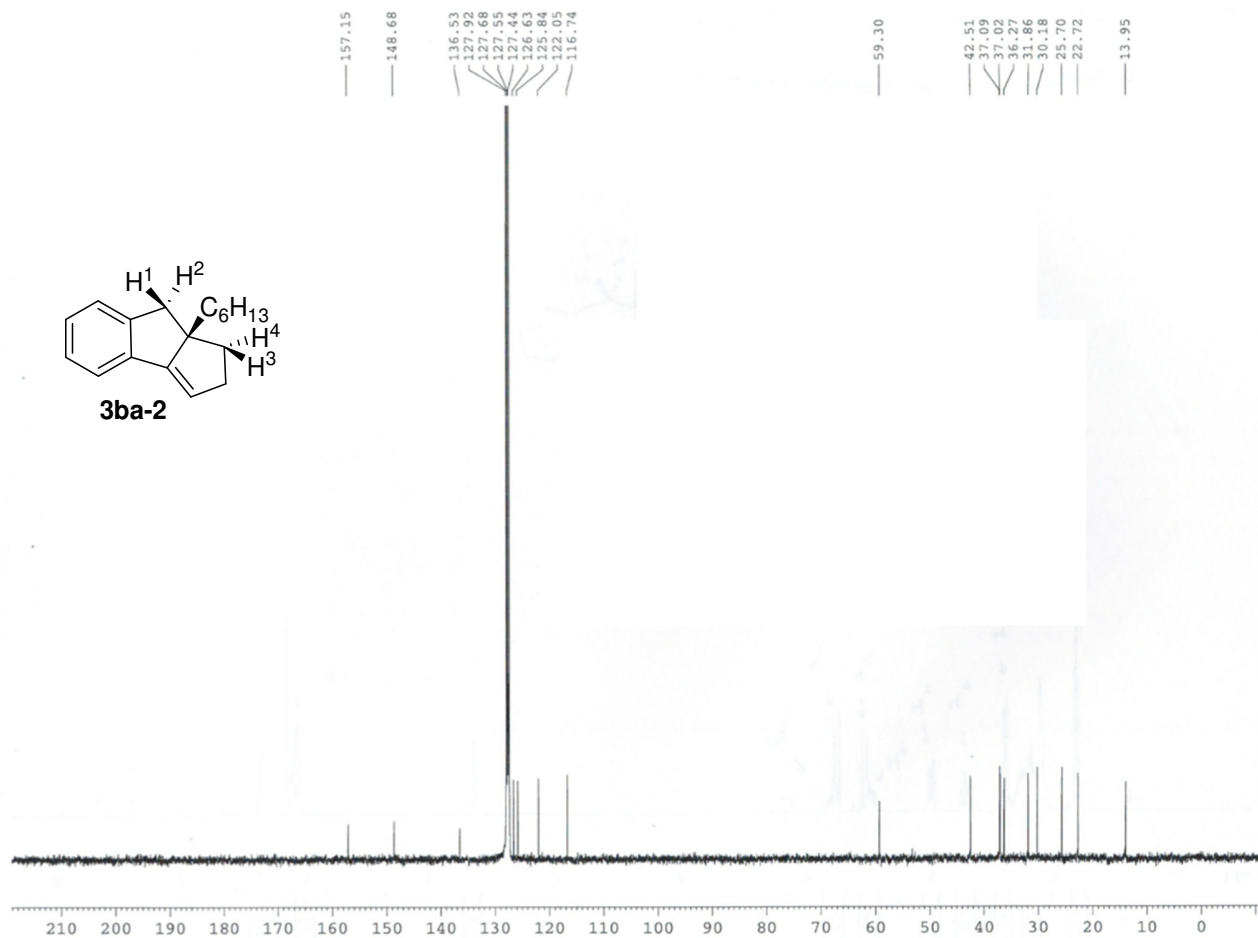

<sup>1</sup>H NMR spectra of compound **6-2**

7.414  
7.400  
7.245  
7.231  
7.216  
7.201  
7.190  
7.178  
7.164

5.744

2.872  
2.852  
2.831  
2.807  
2.630  
2.623  
2.613  
2.606  
2.597  
2.590  
2.580  
2.573  
2.573  
2.125  
2.112  
2.101  
2.089  
1.846  
1.827  
1.804  
1.784  
1.377  
1.365  
1.354  
1.332  
1.314  
1.302  
1.290  
1.280  
1.264  
1.232  
1.086  
0.872  
0.859

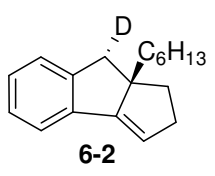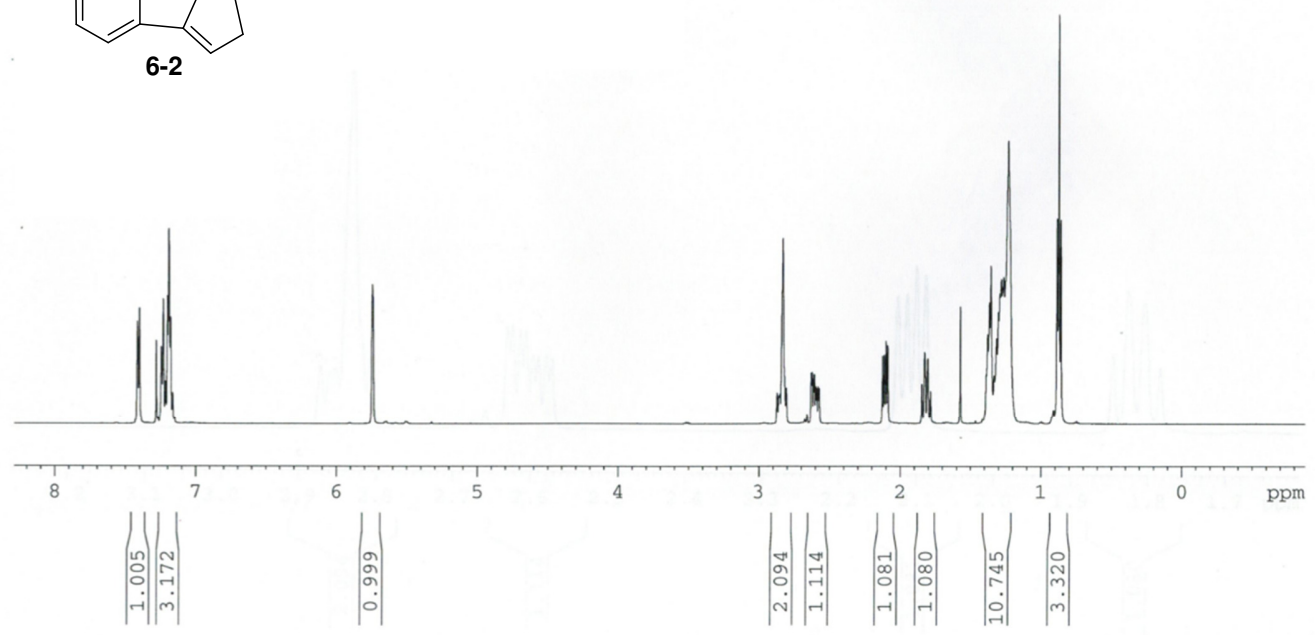

<sup>13</sup>C NMR spectra of compound **6-2**

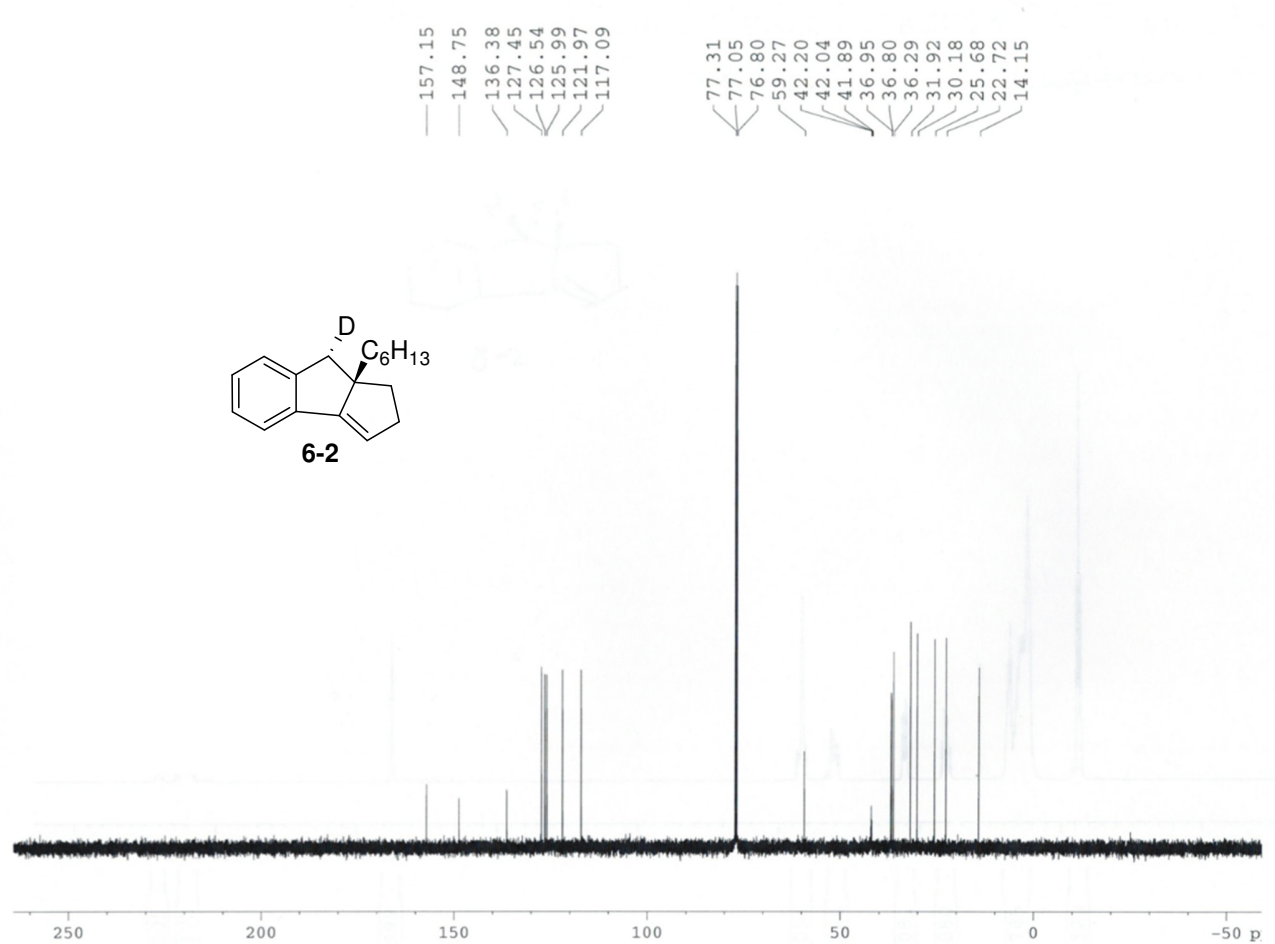

Supplement: ja500716j_si_002.pdf [file ja500716j_si_002.pdf]
